# Supplementary material
Source: publisher figshare collection journal article supplement (https://acs.figshare.com/ndownloader/files/9742483)
Supplement: Supplementary file 1 [file 9742483]

## Sheet: 1011_A10
MGPALGAGIERMGL
VGPQFSMNHYM
AHASSSNIGSFLEK
RDDLGSSFTSGYTK
MGPAIERMGLGM
AGPVMPLGGRHAGL
VGPELQEPLRVAL
STASALTKLLTK
FEDPKFEVVEKPQS
TGYVIDPIKGLK
SPELERLIIQSNGL
RSVSSEASSSKK
KGPSFDVQVGLHEL
SGPVLGGKRMVL
RSIEEAMNEIRAKK
GGKASQLGIFISK
SSPHFQVAERAL
LGPGLNKAGKFPSL
RGFWYDAEILRK
HSMQAGYLEKAQK
SPDVSSVSELTNK
AGPEVEAQLRNLGL
KSLLAHDLKLTRK
YTLVITDKEKAEK
RSLGSGHLQGKPWK
RTYPDDFNSNGK
RQVAITGFFQRK
SGPYLNKGRIAEL
SGPALLALHTSL
HGHGPSPFLRITL
NAPHLQLVHDGL
AGPLLSEEDKPQSL
NSSYFVEWIPNNVK
AAPLLSVARAAL
FTRILKHGAKDKDD
RNPKVLNPRGL
KGPQLPDFERESL
FGYGLWHSEEA
DGPDFLSEEDRGL
NSFRYNGLIHRK
SGPVLGGKRM
HSPGFSYNLETNSL
RALPMAGPEPMK
NSPGLQSKEPSSSL
KSPHFSAKMNSL
MGPELVKIADF
HSMVYPPSAAKM
RAFPLFTHR
SGPQFITNSEEVR
SNMEIGMKVALEGL
VGMNFKTPR
QPRIVKWDRDL
KAYPLADAHLTK
SGPDLDLNLKGPSL
RALSTGEKGFGYK
AAPELIQGKSYL
AGPIFMNHREQAL
RQLTQAQEFSHK
SGPQFITNSEEVRL
SGPDLSTAILHF
TSLDYIIGDVGITK
AKFTATASLGVIHK
SGPQLLPVRAL
KAIQGILGKSMPK
SGPHFSPEHKEL
KAYPLADAHLTKK
RAVDYMYMRKNTGK
SSYVLADAIDKGKK
YTMKLKNYL
SNPDLHLNRATL
TSVAVTSALPIIQK
MSMVANLLYEK
VNPHLLKDLTERGL
NGPELLPRVAML
VGPEFGKKRLGL
RALHGTGFLASK
NGPILDKVVTAL
NSFEFKSLTDSL
TSFFLGEVGNAAK
TSMLITQGLISK
SAQGSDVSLTVPKV
RALPKTYQQPK
NSSPELLRAVTL
ANTFLGAKATSGL
ESLEALKQQQMK
FSLGFDEPTEQPVR
RSLPVPNKSGPK
RNPEWGLRDTSL
HASSSNIGSFLEK
NGVKFTNSKLTSL
KSMESSLKYINK
MGVHISRIQSL
QSYVWNNMVSK
SNPALNDNLEKGL
RAITGASLADIMAK
VGPEFGKKRLG
SYSTTSSYSMEIEK
KSYSYMTEKM
DSPVLRNINDGL
TGPNMGGKSTL
QSHDYNWSFK
SAPELPQRHNSL
VSFELFADKVPK
AAFKELQSTFK
NGVVIHLPGL
MQKEITALAPSTMK
MGPGFVHNFQEMT
MGMEGIGFGINK
MSFLLPKLSSK
RALGQNPTNAEVLK
FSPAISPTHPGEGL
FAYKNVKFVLK
HGLPYVNKPILK
RAFLMQHDSANK
GSPSLQHSRDDSL
AASTNGSSITPAPK
SNPKFAEHGETL
HGLIIRVKGF
AGPHTSQAMEVDGL
KNFEWVAERVEL
SSPELQAQMEARGL
EGFSIHTRDSPK
RSFPFVSKTLGVDL
RTLTYMSHR
RGPGLSVQHTTL
ASIDILHSIVK
YGDYGEFDRKT
STPLLTVRGSEGL
HGYENPTYK
VGWEQLLTTIAR
RSFDTSLVRK
ATFDLSVQGSHK
SNPSFHVGAITSL
SNMALGKFRAAL
SAFGVILQTPK
RQPFFQKRS
SGPALPDGRFHL
RIFAPNHVVAK
STSGVILSPYKSL
KAIEMPSHQTY
MGPAIERMGL
YGAQFHPEVGL
KALETDGVSGVSK
SGPVLWASHL
KSPGFASSKADSL
AALDIGVPDVTLK
TSPELPDHPYYL
NSFNLKDMAPGL
NSMNIPALVSK
STVQFHILGM
VGPWIQTKM
SSLDLSELAKAAK
VNLALDDVRSSL
KGPKFKMPEM
KSFEVIKVIHGK
ENYAELLDDGFLK
RSGPFGQIFR
RSGPFGQLFR
KAFDSIISKGHK
SGPYLNKGRI
SSGPSFAGKVAGL
KGPKFKMPSM
KAFSIGKMSTAK
RSLPAPGPSPSDKK
TSFEINLKEKK
KSMNFDNPVYLK
KALSTDPAAPTLK
RSYSESEKQWK
SHLPMKLLRK
SSFLLKFIQK
LGPLFKSSPEPVAL
RGLDISHISQR
MSPTLTMRLAGL
SSMPQKFIGEK
GKASQLGIFISK
FTVTFNPKYDTL
TSGVILSPYKSL
VGIGFSNLSKTLK
NAPQFKANHAEL
TRILKHGAKDKDD
KSYSYMTEK
IGYDYKLEQIK
APSALLRPFWK
RTIATALEYVYK
RAISWTMKKK
AAPFFIVRHQL
NTLSLDIHENHSL
QQPHFPGLTRGL
ASYEQQLEAVK
LAYIAHPKLGK
AIIKFPLTTESAMK
SGMYHGDLTEK
ALTNGIYPHKVVF
GSSPFFERSGL
RIHFPLATY
VPPVQVSPLIKLG
HNMDPQLRLLL
MGLAAQAFHY
SSISYKTFLPK
ESGLYFIRPLK
RSFDTSLVRKT
RIMDPHYSHK
NNPLFQYKYLA
KGPKFKMPDI
ANLDYKVGWK
KSFQQELDARHDK
NGPEFEKMTM
RSPELALPRGM
SGPSLNKENFIGL
KGIDYNFPSLVK
HSFDVKKLSEK
ASLKNLETISNK
ADSSNFYITEK
YNPAFEDHQNL
RSMEAHNILSK
GLDALSSIISRQK
FALTNGIYPHK
SGLDLSGHAGMLTL
AVLKFIEGISEK
GSLFMDTEKSGK
YDIAFHQDGSL
HSQSGFYYK
LGPMFSGKSTEL
MNIKSATWK
KSVNFDMTSK
SGPYLNKGRIA
RSILYSAGEFQK
IHLPSPVTAQK
NGPNMHPGASM
TSLAYFEDRHGK
RGYDSDPVKAWK
HGVFLPPNMQGL
KGPKFKTPEM
RTMNIKSATWK
FNQEHLVIYK
HSLPFSLTKM
SDGSSLEDLVVK
STFDMDKLKSTL
KNTTFDTFKASL
RNPSLPNHTEL
WGPQNIRVNSL
FSNELISRDEGL
SSPELLRAVTL
ESPVLDLKRSVL
GVDEVTIVNILTNR
LAIRSPSLLQSGAK
HDLQLHWDS
RIILYDTSSKK
TASALTKLLTK
VMEETFSYLLGR
RVLDFDVKRK
SNTLFKKIQAL
VGPRLPWKSGHAAM
LGVRPSQGGEAPR
TSPMFMEKVSL
FGPLIGQQSHSM
SGPPFSDHEAL
RNLKLKLHSF
FGRGGAESHTFK
LSMPDVDFHVK
SSVYFRSVEGL
DVVFLIDGSEGVR
SSIENKQDWIK
KALDFIASKGVK
SVVSPSSFENVKEK
RVYWSTTDARK
HNPSIGEGSVGGL
SGPKLEDGRVTI
AGPGFGGARNPAL
LGVHFSKVRSL
SAADFDDRRGVL
TAPALSSSVRTKAL
DSSVYFRSVEGL
EAMEWVIHK
KGPKFKLPEM
RGPLLGHTDAVWGL
TGPIMPHSL
ASILMKFQELK
SGVAFTSAKENFSL
TSSGSVLLFVTK
KAYPNNYETMK
FAITAIKGVGR
VISDGSSLEDLVVK
HGPAWRKKYSL
KNIHLHAHSL
KNFDEAAKVLK
SPVLDLKRSVL
HSIIQDFTK
SAMYSRKALYK
RAPTFLLGGGAAL
ISDGSSLEDLVVK
AGPSFEERKKLGL
QTLTKQDTMLK
HSPLFPEMQSL
YGDYGEFDRKTK
RALPKSYQQPK
NTVTLKKLAESL
RAVEYNALFKK
ANMPWFKGWK
LGPSIDTHGETFL
ASYGDLHATNK
VSKEDEEIYK
KAPALPGSSTGL
SGPNFVSQSGTLTL
GPALGAGIERMGL
MNTVLSRANSL
KAIPVYKVATK
QSLPPGLAVKELK
KAVELNPKYVK
RSMELGGRISAL
RIMKKTSLY
IQRPPKIQVYS
IQRPPKIQVY
AGPSFLAHLQTL
AGPGLLPRKPPGL
RAYDYVKER
KGPTFSDKGGL
HNADLSRAVSL
RAVTIFIRGGNK
SSPYFRDHMSL
RSLEQFKAIYK
FSYAGFEMQPK
TGPVWREEAGL
RQPFFQKRSEL
GVHGGMINK
HGPLLKHEAL
HAIELNPSRTLL
YGPNPGHMPSL
ATIMGVRFK
SSFELIVQKL
FVLQLDDEHSL
ASPVVHIRGL
TTLAFKFR
STVDLGGPLHSL
RVVDSKDLTTK
RTIQAAFRGMK
RAPSLGSSHGSL
SGYQPPRLK
FGFAIGSQTTK
HPEFSADSAGSGL
RGPELPQKRL
STMNFKIGGM
MGPVMDRMATGL
MPHPASAPFGHK
KNLLLLGKTYL
PRIVKWDRDL
RIMELDPNDGSLK
NSPLLFGRLNGL
RSFVIDHQRL
TGVLLHPEWSL
ISPSMGHSLDVGL
SAIIDHIFASK
RSIEEAMNEIRAK
TSLAYFEDRHGKK
SGPELRPHSYL
FGPALSVKVM
RSFGSEEYTSGK
FSIENGLLTPTLK
RSSGSPKFAMK
ASLKDLYKSLK
VGIRYYETHNVK
HGVSLSKTTGL
KAFSAEMEKNK
RILQEDPTNTAARK
SSLPWVGKELYEK
RGFVTGGADKSVK
FGYGLWHSEEATL
KAFGASKTFGK
NGVEIHVDSV
KSIKMISSY
KTYTIKEGSMK
STPEFTVDLKGASL
ETIEFVRATQL
ASQEIAEKALK
YTVSVKAPNL
QSYDYGGSGGPYSK
SGPDLSTAILH
RAFMNDPAMNR
HGLELRVPFL
SYTITGLQPGTDYK
FAFEGILTKK
YDIAFHQDG
RQIPQAAASMK
RIYNMEMARK
ATVELIVQSHAGL
RQILLPFRK
RNPEWGLRDT
NAFRIIKEVQK
RSLVDYENANK
RVLELVSITANK
DAMMNEAPGPINF
LGPGIENRDSSNSL
KALDDMISTLK
HSLDMKFSY
RILDAWEMNEK
KGPKFKMPE
RGLVVSPKDYSTK
RGLEHPLFPK
YDGSALIRASGK
TSFYLPKDAVK
STPDFGFGGQKRQL
ESLKKKLGY
AAMPFRGY
KAYQIDPTLAK
RGVRFDVHDVTL
YSYPTKQAALK
GDSSLHIILKK
KSPYLPSAHRVSGL
KSLLIGVFKH
FSNKITPVQSKEAY
RIFEPPPPK
AAIGLAYDRKKVSK
KGLDFSDRIGK
SAFDTQITKK
RQFPGSHRVK
VGPRLDHERAKSL
RQIPYTMMK
EQPRIVKWDRDL
SAIEWDGKIYK
NDVEFREVTEL
TAILVGGMSTQK
VSPQMASHAGL
AGIDGEKEHAHAK
HTPLLPSTTGL
YNQDLSVRGK
SSFKDFAKSK
RSAHLNALKM
SGYYKVLGK
RAFNDPFIQK
RAMEDGGVKLLK
RSYQPLPETKK
RSLRYYYEKGIMQK
KSIQLFKETSK
VSPFLGISEDRGL
SSYKIITGR
KSFEDIHHY
HSIDGRVVEPK
VSLPVALASVTVK
RSLEGTEAQVFK
SGPLAGSREQAL
RSFENNLNTYK
FDIAVDGEPLGRVS
AITGASLADIMAK
GTMTGGGSKVMK
RSYLTIHKR
LGEYGFQNALIVR
HNMDVPNIK
KAYQALKATQAK
RAVQEFGLARFK
KVLKAQAQSQK
RTLGDLVRKL
VPPVQVSPLIK
VGPTLKATFTTL
RIHENGYNFK
HQLPLPHNVSSH
NGPRMGDADYL
ASLQIPHGATVK
RSIAWEKSVNK
TAFQGMLRKL
SSPLIDTERNLGL
GAYGYSNPKILK
RTLNPQMLQKK
SPVNPAVFPHL
RIAGQVAAANKKH
SNTVFRKNSSL
HGPEYLVRL
ESLPATHIRGK
RSFPFVSKTL
RSPDLRPWA
STPEFATRSMAAVL
SAFNLSELARK
KSITEGLLTQK
RSYLLKINGK
SETYSTYIFKVLK
SVAVTSALPIIQK
RAYETSKMYR
VAYQYWNTK
LHFFMPGFAPLTSR
DGSSLEDLVVK
KNPGFEIIHGL
RSFPFVSKTLGV
NGYGFINR
RAKPEYISKTYK
ASIQMNVAEVDK
SSFEATINKF
RQFQQGAAGNMK
AALPAATLWYK
FEENVLPPKK
RGGKASQLGIFISK
VNPRFQEADSPVL
TALAFSKNGRLAFK
ASLEISRKWEK
VAPTLTARLYSL
KILHPLAPKMM
RTLGYVDEAGTVK
RSTASALTKLLTK
FGWSVHAPSL
FNTKFKNRATL
SSMKFVQH
KSNNSMAQAMK
KTIDMELVKRK
SSPEFSKTLQL
AALKNPPINTK
ASLTSTSALEVAQK
RSVQLPDGGWGL
VAPLLGGQQREGL
SALFLGMAYGAK
SNPRLVDADGMTSL
GNVDLSKLEVSL
NNPKIHLAQSL
IGPVYSSKAARSGL
SNLPIWVSKL
EKAENSSLNLIGK
YAPEFHQRPGYL
SGVDFRSSERL
GTKSPWPPK
KAFAMIIDKL
HKSSQLEFLTK
KSVEMHHEAL
VGPELHDRLL
TGFPYKIFK
NNPLFQYKYL
LGPALQAAFKL
KAKPVPWVEK
SNPYFRNEGL
AGPEFKVSAQFL
RSIIHEGRQK
DVASALDFLHNK
YVDDTQFVRF
SHSMRYFLTA
TSFLEKKVKK
FGPFFRTEQL
FGPDFPGAHF
NGPELLPRVA
LMRALPMAGPEPM
HALEQQMQKL
KAFSQKQYVIK
FSFDLTPLTKK
DNPSFAQDHQL
NAPKFRLHSATL
VAVTSALPIIQK
KSYDQVHSGK
TTLPFKPIKK
TGPSIKIWDL
LGPVLGSLPAHSL
DNPALNAQAAL
AGLASGLLNQQSLK
LEQPRIVKWDRDL
NALDLMENKTFL
SSFQFSVQKL
KSFEMTVEKV
YGIAVDPRHLSL
LGPMFSGKST
ESFDTWANK
RSLFNNAERAK
QQLVQRVPKM
VGPVVGGNPQITL
RIMKNAIPQTGK
RGLDNTEFQGK
RAIEINPDSAQPYK
RILEMNNKYVK
KSLDTNEEGGRK
AGPSFEERKKL
YGPHMEAVRL
MTLPLWIGK
FTVTFNPKYDT
HTVRFKNEL
RAIKLWAKR
ESLQQVRQQLK
QNPGFPVNKDVTL
KAMARDEKNYY
RSITAAKYREK
FSINVRDFEGK
MSVPVFNTK
KVFTLPKVSAK
NGPTAKAHTGL
QSMVDELMVKK
ASYKWNVSR
RADDMKWAQK
HTYPDGIYK
KILTFPEKVNK
NSPLLSALKGL
HSLLTGSYAQK
KSFEDIHQY
FSMVIEDGIVK
FGPDVTKAFL
LQVLTKNRDNHNL
LSIKDLITTQK
AQKFPINTPK
ISMPDVDLNLK
RSFTWQDQHK
RQILLGPNTGL
MSPDLRPHAGL
QGPHLVTGKGL
AQGSDVSLTVPKV
VSPFLLGRAL
VSYQKLLKY
YAMEDVATRR
HSPELIRVQL
LGPDFQGARYL
KILDVLGHIPK
VAVVVDPIQSVK
RSMVLKLTLR
AAFPLEPKFAK
DSTLIMQLLR
RQLTEKFTAK
SSLKLHKMWK
SGPWLAHVI
KAFAMIIDK
RSLQKGTFDSK
TSFIPRFK
NSPEFQKLLGI
YGPGVAKTGL
MGLEVPVGK
QNPVIGSNGYFL
AGPVWREEAGL
EAIQAQKIWK
NNPALSGENLIGL
RALPEFFNGK
YPPPPPPPPPSRK
KVLEGMDVVRK
AGPGFINIHL
KQLIVGVNKM
RSIQVDGKTIK
YSPEVSSKAYL
RNPEWGLRDTS
PSASALIIKALK
PSASALILKALK
RSISQSISGQK
YAMKLLSKF
ISMPEIDLNLK
SAYQNIAHY
RGFEKIMKR
AGPLLRSNGQSL
MALKADLTSKK
TQLNMFQTLK
ISMPDVDLHLK
MTIKNKYATSK
SGYEFIHK
RAKASSLSEELK
LNKIFSGVFVK
HSPRFPAQYL
PKFEVVEKPQS
VGPEFGKKRL
NSPGLHVQHM
KSPEWSKFLGL
YNRSLNEYKAL
SSPHFQVAER
ESIDNPLHEAAK
RGPSWGPGGPNTVY
KSFEDPPNH
SSPHLINKL
HSPEIQHGSL
RIIEKVIYR
SNFPVVKK
VGFVVDAKTAGK
MGPWSGSRLVAL
AMPHIKTYL
KAPGFGDNRKNQL
KAYDKAVASFK
STPEVKPLKSL
FNPDFAEAH
YGPQITVKRI
NNPDFKAGVMAL
RSYESQMVIR
RAIVWLQNR
SSSFELIVQK
SSKTWLTGK
ISMPDFDLHLK
NKLSSLEGAHTK
MGVEVRQML
ATFPLSVQKF
KSYLMNKLAGK
RGINGGPSRMSPK
YTIYMGKDK
HGPSPFLRITL
QGPLVENARAL
YAPSLRFIHGL
GGPKITSKNF
RSLMTQTLEAVK
LGPALRIPADATAL
ATMAQWKKK
KSMESSLKY
RSFHPMLRY
LGATFHYIDSL
GNPGFEEERAL
SGFPGLPNVLK
ATIRVLESVQKK
MGIEFREGSL
ATPELSTAKSTL
AGLGLPTRGPGQAL
SNPALNVLQRL
HSVQFSHHVFL
YNVWLRAQL
LSPHFPHTAAL
SSPLFKGGQNSL
KAIGNTELENK
TVYQVMEESQK
KSAPSDSLTYK
RSFSDPTSKM
EGPGLSRTGVEL
IGPWIQTKM
INPAFADAHSNL
KSLDDKYVVGK
RSFGHFVARL
RSHYFEGVLK
GTMTGMLYK
RSLPAPGPSPSDK
STPALGRLTASQL
VGPDFQKGL
VQFHILGM
AVTSALPIIQK
ASYHISNLLEK
IGPALKAVGLSL
KGPKFKMPEI
RAYQNWVKK
GPGTSFEFALK
SGIKADVVSSTK
VNALWGRTTL
RIMQIHSRKM
QDPQFGWDHSL
RSYSDPPLKF
KTVVLHIDGL
LSYPVFKGIMK
YGMEFRLKTL
YSKEFFTKK
SVPVFNTKKAL
KGPYLLGVKAVL
DALSSIISRQK
EQMRANVGK
NGAVFRPEVPL
SNPLFRTSASISL
KTFTKWVNK
ATFPVAPRYAK
SGIVYPHPK
ISHIVTYYSGK
AAIQGLLKKH
ASALTKLLTK
NSLLFDVHTTLK
SSFLIKRNK
MSPPIGTVTPAL
RAKSFFDVALK
DSPYIRALGF
SAIDRPVVYK
YGLGMSNEIGAIEK
QAPTLPSGAHL
TAFKNFIEK
LSYPVFKGIMKK
HVIETLIGK
NTFHVITK
IAMDMILKM
SSLKDLITKM
STPELRKTWL
AGINIGPVHKK
VTYVPVTTFKNL
TGFPAAQTHLK
RAVHNPMIQK
STIGAGAYAYK
KNPEFNKMVL
NGTEFSVKVSL
STVRLLKDSSL
VPPSGPVVVVSSL
AQLGLGRGASAFK
SSLSLVEIYK
SAVGGGIGHQK
AQFFLGTTNK
TGGTFVVKGL
AQFHFTGIKK
ASMDPKRFYKK
KTTFFNVSSSTL
TQPALKTQFL
SVLIQKQIFK
DVSGLRDVKMVK
SNKEGTRWFGK
FDITLNHNSAL
QAVPYDFHAY
PSLLYKHIVGK
RAVEMDKKYIK
GAYREHPYGRY
IAMRPGLEGY
SGVILSPYKSL
IIEPSLRQLAQK
NGPILDKVVT
RIIFPGTGY
KALETLVKGVK
KSFYWARKK
SGPKVDIEGPDVSL
GKFMKPGKVVLVL
RAIILRDEAAMK
SPYFRDHMSL
RILSGPFVRK
IAIDWEPEMKK
NGLQIKGQAM
AAIATIKTK
SGPHFFSDPVS
TGASLADIMAK
TTPTYGDLNHL
EGPMAASREGL
RSFFLGVPRL
DGPMLRLEEL
KAILNGIDSINK
YAYKTIKDDKK
ANLQYDDGSGMK
SNPRLNILDTL
RAPTFLLGGGAA
TSMEWDTQVVK
SSMEVKEDK
HVYSFPNK
SAYTIYMGK
YNPKFSKDM
RAMELLKVSK
TTTTLERTEGL
SSMKNSFGLK
TNMKWIEAK
KGPFIQGKML
MAFSQKNPK
STIHFYNLQEGL
RTLEKALEKM
RALAEQKATEK
ANAPQPIFK
AAYLGSRQYK
VVSPSSFENVKEK
FSPVVDVKKTAL
STVFWKSGNAL
LSSFIDPKKQPAT
AAFEKMQEK
KAIEENNNFSK
NVPMFRNVSL
KALEENNNFSK
RTFSYIKNK
FSPFLRASTQSL
KAKEPPFVRK
QAPMFRPDTTHL
ESFKEKFIRK
YAIDNPLHYQK
YGINTDPPK
FNPDFAEAHYL
VNPQFKIRL
SALRFLVVTQK
VGVGWRVDYTL
SVYVYKVLK
KTIKIWDTTNK
KGVTLGFRYK
AAMLDTVVFK
HPAFSHLRVL
FNPVLQRGVEL
RSLPHFEKH
SSPFFREAL
TSLSWKRVK
KSAIGEGMTRK
ASHIASNPK
KSYSFIARMK
TGPPLKPAVTL
TAMDVVYALK
AGPELLLDSNIRL
YGSQMMGGMGL
YGSQMMGGMGI
AAISETKVKK
YTVDLKTYI
NGPEIISKF
VGPGLGSGVRARVL
ATLDVSKLTPL
SSPKLPVSSLGL
NGPELLPRVAM
SDVSLTVPKV
LGPDWHEGLDL
ATHILWPPK
KQFAEMYVAK
KGLDIESTSK
SALFAGKLHK
HIYSWPKNK
ATIRVLESVQK
ENPQLKQIEGL
MGPGTSLRHLFL
RQFGKLHTDK
KSLGLLTTKF
FGPEVDHQL
QGIKMVVPGL
ATMATSGSARK
YNVSWNRNGSL
HDLFFKAVSL
SSPSLGEKQYFL
MSFPTADLTLK
KALQQEKQALK
SAFEMKVYY
SALQMPLHIAAR
ASLSLAPVNIFK
RILFDNAVKK
LNTAITRAQSL
RGMKSLVNKM
AALDWVTKK
LGLELGKVVTK
VGPELHEKLL
YNELRVAPEEHPVL
NTVNLLHEASL
RSISLTRPGSSSL
LGPPPPSFHL
KGPGPGVKFSAEAL
TTFTKIVNK
RTLHLPVSTTL
RSFDQADRAK
TSLQNGRMSIK
YTIKEGSMK
SSPFFERSGL
QGYPHDPPK
TNRENYIHR
YGPATQVRWL
LGPLLQHSPGGL
FNPSLSKAMVL
NSFVTDTFEKL
KALETNTHVK
TNQFFAIKAL
SGPELRPLL
RTFSWASVTSK
KSVEMWQVKL
RALQAWPLIEK
EAFYIKDPK
KSMNANTITK
RSAVGGGIGHQK
RALGVRDLSYR
ASYEKNLPK
FTLKLTRKQVMGL
RNPALLKSVSL
SGPDLQRRTHL
TSIAIDTIINQK
KIINSAKTGSFK
YSPQMALKLAL
FKPSFDVKDAL
FGPVYEGKDLI
AAMLMPHQK
MSMPIVSSR
ETIEGSSLFPGHVK
YSLEMYQKM
YSFTHIVPY
NGPFINREQL
STPYVAKISAL
RSLAAHTPTVLK
LAYEQVAKALK
RSFSEFPSRK
NAYKDLAWK
FGPDFPGAHFL
DSSSLPALLFK
SSPYFKVQL
FGIDGESFELK
ASYTKIVVK
GGTILGTRNLKGL
ISYSNTGDGAPK
ATLSLAEIQKL
RSLLTDYEQKK
RNLNLIKRTVL
YNALLKVYL
RSSEMLVKKL
ATLDLNAVKAL
AAFGPWIQK
SSFRVLVVSAK
HTYNLVQVGDSL
TAPIFEKTDSL
HSMQAGYLEK
NSFVVIPK
SALKDKITFK
TAMPLPIGR
RSPHMKADPGL
SSPEFKIKIPRHEL
STLEFQREAI
WSPVFRNYI
KSMEMLVEH
STIEFQREAL
ISVYYNEATGGK
YNTIVGERGATL
RGAPPPSGPVVPVL
VGPELSRRIYL
VSMPDVELNLK
ISMPDIDLNLK
KSLGHGLINKK
NKELDPVQKL
NTITLGVKLEDAL
AGPGLFHSQTEL
GLAFTDVDVDSIK
MSLKDWFAK
LEQPRIVKWDR
NDPALRGGGL
VSLIEKRLFK
RAFSFSKTPK
RNKDVLAWVKK
SGPHFFSDPVSL
RAFVPQLRSGK
QTFLLQTTKL
HALPPGFVLK
STTTGHLIYK
EITALAPSTMK
SAFGALLGGAK
RAIRDFFWKTGNK
FGPDTEHLVL
KAFQATQQK
QSPDLHTRHGAVL
KALDTKIGRYK
KAFEDEMKKL
RGMSWEEATK
QALDIILEKM
HIIDNFFVK
RNSNTVVFVK
RAANMFKMAK
RVLDPSKFLK
IAMQYLELTK
GSSPEFNSQFGL
FDPELRIMAI
KSPHFSAKMN
GAPSFPKDMGL
TNNPRFDKM
NGPGLSRVRESL
KAKKDDQMLK
RQMEMKILRA
AGPELQRTGRL
KAIMPYGVYK
RIYSKFHQK
AALIQQATTVK
SIYRPFVDKALK
RNLPWVEKY
LNVDLTEFQTNL
QNPSFSQINQL
FQMNVGPPK
RQIYIYNEK
YGPYLSSGDIADAL
VAHKLFNSLK
YNHPQLIKY
YILSVQAEQQK
SAYTIYMGKDK
AIIQIQIKDSAK
SGPIYPGHGM
RGMDLRPGNAL
RAIEVVESDVK
SIGDSSLHIILK
RAFPNKQGY
TSPQFQQALGM
SSVRFDSVGGL
AALSYGHRPLSK
HILPFDSVRK
TSALPIIQK
PQFGWDHSL
TGAAFGAMNGL
LGPILGQRGVSI
SQMEQFPVK
QGILGKSMPK
RVLTAVEMGMK
YSHLFTIK
VGPEQKVKAL
GAPMLAPEHTL
RTLQKWHDK
QTPGFGNGDHYSL
VNMKKFFPK
RNITIKLGY
KTIDYNPSVIK
STMGYMMAK
VGLLIGPRGNTL
IGLRLYDGLFK
RGPRLSLRFL
AAYAARWVAK
ASDELKEMR
EGYIMGFISK
MKFNPFVTSD
FSLEMSKTEAL
VSLQVNVSSVK
ISFVNSIATSK
SAMLPFATEK
TGMRGAFGK
KVLENIELNKK
KGVSLGSYLEGL
MAIPFFTGR
RAYHYFQRR
VTYVPVTTFKNLQT
HSILGLLERK
KNPSIGESSIEGL
KAINPINTFTK
GQLEFPLPAAGH
VNTMFVSKTL
RTITVGVYEAAK
SGATIRVFK
TGYVIDPIKG
DDSTLRFVDK
ASLMRLVPK
QAFEADIAAGK
YGMELRKGSL
HSLSPGPSK
AAPDFPKNDSL
SVLPFDGDFARK
ATLLWRTAEGL
LISQIVSSITASLR
HYQINQQWER
RAIGYYSATSK
RSILNNKLISK
ASIFVKDNVTK
LGPLFRNSQL
MLMPKKNRIAIYE
RGYSDENSNAK
RSLPQRFKM
SGPALTGLRNL
IIYKDMVTKM
ATISNDGATILK
KGIEALKQVTK
TAPHFSFHL
VGDTYERPK
RKFSSIQMQLK
ISMALGHLHQK
SSPDMNETHSL
ALLQAILQTEDMLK
SSFLPWIKK
DSSLHIILKK
QAFYLHTTKL
QQPDLAANEAQL
KKPVFDLKASL
HGLKLHQSL
SSIVMPEAVVK
KSFVKVYNY
YSYNIRHSY
NGIILVHDL
SAADFFSHY
KILHPLAPKM
TTIHYDRITSL
QSLEHSWIK
TSMSKMFVK
FTFKDLHFK
SSLLPAELALK
VGPEFKDKL
ASYDGTFLWK
ISMPEVDLNLK
TNLDLRHALL
HAILNILEK
FGSESGDNVR
IAINVNDPEASK
GAPALTSRGFL
SGLRGDEDMALK
YDPNFAIRGL
RQFDNFKRVFK
TSPMFMEKVS
LAVNMVPFPR
VNPDLQYVKI
KSMSFPTGKSDR
RSLEESPGGSRK
TAMLPHHWK
AGPIFRTNEM
FGIDLDTRVAL
QSIDMKLFPK
KSFNLKAGVSK
YSVTVKWGK
NDSSQLTFQNK
ISMKVKYQSLK
RSWAIHTGRYK
RVFAWHPHTNK
FTFKDLYFK
RVFVVGVGMTK
KGYTIPLDK
LSIERIYQK
KAFNQGKIFK
KGYTLPIDK
YGMKFLSENL
ANSAFVERVRK
KSLAFEKAKLK
MSPLLQAHHAM
VGPEFKDKLL
SAPILKRAL
LSFDYKLVQK
IATTGKMSEMELK
TGVQFTTKVRL
EGPGWAHPDNVAL
GALKAQTWK
ASMDPKRFYK
SQPVLHILTTL
KAIEYVHGY
KSFEDRVGTIK
RSVSFSHDGL
NNPTLERSIAL
VNLYIQDKEGL
RALKEDFGFK
YQPFFRAHAHL
TSLPMFRSK
IGDSSLHIILKK
HNQSPRNMY
TALKDQLLAAK
KGFPFWPAK
QAYGYAVENAK
SSAHWPIFK
VSMLNVFLK
KALEGMFRKL
DIAVDGEPLGRVSF
KFTATASIGVIHK
TAFQGMLRK
KFTATASLGVIHK
MAIHIIDRALK
RSPAMGTLGGDFL
KSMSFPTGK
QGPSVLKEKHTSL
QSMDISLTKL
GSYLKFPTY
YTVPPMEK
GMNFKTPR
RTMLFNIHSL
FTVTFNPKYD
SNTKLDADYPL
GNSTAIQELFK
EAMRWFQQK
GSSFSGLLRK
VTPSLLHQDLAAL
SSPRMQQRAVL
RQIEIPKVAK
TSLPWQGLKAATK
AQVDLRNASGL
SGVGLRLTTSL
STVTLEHEHSL
ESFRIGEKQNK
TQMMIHSKSL
KAIVTEPKTEK
RTPALPSAVNL
AGPSFLAHLQ
KAPTLGGGFHVSL
LAPHLPQITTL
LALAIGAKTYK
AGPELQNKAVL
ISFHLPVNSRK
KALPNSEDLAK
QAAQLYQENK
YGLPDDIVIEK
KAPIYFSTGL
SSFTGPVPR
KGISPSSLAAK
SSLEIMREKL
GPELHHKL
TGPSHSKGSL
NGVHLKTEL
ATDKSFVEK
RPKHPIKHQ
YPLEIVIPK
YTLQINPNSGL
FGVEETAIGK
SGMPDFLEK
TKILPWYPK
EAFWLGNLK
KSLKDGPKFLSK
YGVSINGHL
YQMHLGVMGSAL
YTLDDMFVSK
SNPSFHVGAIT
VNKKFSNQY
YNKYKYNSY
VSMFVEVHKAIK
RAAPGAEFAPNK
ASPNLIGTTGANSL
FSIHTRDSPK
SGPQISVPDVDL
VVLPYLVPK
AAYAHELPK
RGFTDSPHY
ASSSNIGSFLEK
VGPELHDRL
RQLEDFRSK
STLGFRIEGI
SAFFPFHEY
ESPFMGGPRGHAL
YGFSLRSPEL
SQPIFAQQDNWGL
LQPHFIKADSL
QPTFTPMRVAL
AALEGMNGIQK
RSMYWPVRR
SALQILFSEDSTK
ISFQYPGVNQK
STMAIIVNKL
MGTTKVTAPLIFA
FPIAMVRPK
YSYIMETK
RIWNKLRPK
TSPTFRRPKTL
KGPKFKMPD
SALLRPFWK
IGDSSLHIILK
GSIETSDFTK
AGVILEHLEGL
VAFQFPTKKL
MILAMNEKDKK
QSMDSKLSGRY
STPEFATRSM
KSINNAEKRGK
KSLHLPKNNSL
SGVTFRIEEI
AAFDGGFTVK
HGIMSPLAK
MGGKFMKSQGL
MGMNMISK
SAPALRSLGQLGL
ISFNVLMVHK
GGSSGAKFRISL
FSPLMRDDGTTL
RSAMYSRKALYK
AAIKMQTK
SSPELRIQSF
HSLDLDLRALK
FTYDPWIGK
KSLIGKKGQQK
LSMVWANH
LGPRFTLKLRSL
ISIPDVDLHLK
SQQELRAPGL
QGFYNGPVSK
HQTEMIITK
YNPQFITKL
VPPVQVSPLIKL
FQTFLETKEGL
YQLELHGMEL
ASLLDTDKRYSGK
AAPFFIVRHQLLKK
EGLYITEEIYK
VAPDLGERITL
GSPELLIRSL
GNYLIVITK
KAIELNPANAVY
NSPLLFGRL
ISGPKLEGGEL
RAFDIIDRLK
RVPELNVQNGVL
SADTLWGIQK
MALKWITK
QTLKLSLSFK
MVHMASKE
KSLEETIIQK
KGLDFALLQK
QALVLPTPR
VSIPDVNVSLK
ASIELRVTSL
RILMGSTLRK
QGIDMKQEMEK
SALNHETAKK
SSSLPALLFK
LALALDHLHSL
RMFSAENGK
YALPHAILRL
ASLLVSVTSK
SNPILTAKESL
RSASSLINPLTK
ASLILGVSPSASK
TGIQLNPNNHL
QIHYPFENK
SSLDLGRSDGL
AAPSFSPAAGQL
TGVVLDLDKSIK
SAFTQDSRALK
GEFQLLLDALDK
TGIDLGTTGRLQL
AALGGNSSPSAK
GGAESHTFK
IAMAIIEQKM
ATAQFRINK
RIHVPWTKL
SAPNFRPTFNL
EIGSSPFFERSGL
RSLLNWRTKL
KGIEMLLEKL
MSIDKAVTKL
HTLQVIVDGL
FRDGDILGKYVD
TQLLKLAHK
SSPTLGRANRFL
RGIDLLKKDKSRK
HSHLLKTPL
ENPVFKIPL
YGPPRPGAHL
VAPTLTARLYS
DSPQWSQGLTL
SPSSFENVKEK
HSSPSFNLDTL
RSILAETEAMLK
GSFKLNRKKL
ASIAAAVAPK
RSLLPPKKIIGK
HSGPGIGPRSGL
SAPHMHAYAL
TTYKYEMINK
RSANQMGVSAK
VSIEPNFH
TALDEFATKL
DGPLIKQGVL
HSISDLLGK
RSPDLRPWAS
VTAQILLKAL
KSILYDERSVHK
NSIGAVDEMLK
SSLPALLFK
HGLELRVPF
KSIMPGTRKM
QTLRHYGY
LSLAPVNIFK
DVDIRKDLYANTVL
SALKAWGGK
RVFTTVGSAEK
QSEKTFMPK
SNNFVRFFK
TSLQSLIDMAK
IAIADVDLEDK
SSPKLPVSSL
KGPVAPAHSL
FGMAEFLDK
RAWNPFRSK
KIMGDYGIKK
GSFPRSGFSFK
ISKKWGFTK
RNIENADKAIK
INIYLSDRISL
AVASSFGNMIYK
IGFKQHPK
KSLQAPSVKDFLK
MSKDPTTQKL
RSPDLRPWASL
RALELDGQSVK
SSLSLFFRK
STIKFQMK
NGPLLVNPEAL
SGPDLLTRGL
DLPASYKFHKK
QQPVFDALRDEL
YSIEDTYTQKL
HSPFFKVL
TGIKMGQHISL
RVHWGTSSK
SGFSFKKNK
ISIEELDIIYK
YGLPVVVKL
FSQALQHAL
RVLESVQKKL
KTIAPALVSK
NSFTSSDTAIK
LGSSPEFNSQFGL
QNPSLHHPRATFL
NGISLNLRHL
GSMRIFTKKL
YDISLRRGHSL
ASGAFLHIK
RSHDFLVVNK
FNAEYDEYRAL
VTPAFTEKSSGTFL
YGYSNPKILK
MNRSTNEWK
RGLRYYYDKNIIHK
AAIVERASGYK
RALVQIVKGLK
ISRDNWHKR
SHSMRYFLT
YGYEGIDAVK
LGPEWHGML
SSISPEEKMMK
YSIKDLLNH
NSYWVGEDSTYK
ASLNSSTWGSLK
NGIRLGTYGL
QSHLSFQPK
KNMSIKKLWK
VIINFPDPAQK
KSMESVMVK
KSPVLPSGHHL
HQPFLHETL
KSFEMTVEK
QAFAQVFNK
VGPELHEKL
KAFKQVAPKL
RSMQETVNKL
RTNWPNTGK
TGFSFNTK
STFNQVVLK
SQPGFRKHLGL
DTYKFISK
AGYDYLALK
RALEIYQTKL
SAQSFFENK
TATASIGVIHK
TATASLGVIHK
TSLDKFYRK
RSISKIKRY
RVYNWDVKR
ATPALMGVGTL
ESYSVYVYK
ASMPWNKRPPK
SIFKQPVTK
RSPVFNHSL
HTLKLIHPKL
YAIKIMNMIK
RVLEAIQKKL
GSPAFGSLAGGSIL
IKGVTLGFRYK
VGPEFPKSL
QQLLLIPKM
GSMEIIRGWAEK
TALNLFFK
HGPAWRKKY
VAYWRQAGLSY
KGIYPHEPK
KAFGQSSDLLK
EAIQKNPPK
TAMKQKIIKK
AQIAIDIKSAK
VGPELHHKL
HSFSLQITK
KSLVSKGTLVQTK
KSLQNAQKHYK
ATLALELERSAL
TALELHTEL
NAFDLLLPK
TQFLPRIVTL
AQPVMQTKRTAL
ATLGFRIEGI
VADRLYGVYK
IQVRLPDGTSL
VGPEITKTDL
LRVAPEEHPVL
GSSLEDLVVK
KGYHHRTEINK
KGYHHRTELNK
PFFDVQKRL
RAFHFTAMPK
NTIYVGRVKSFAL
ESFRFQQENLK
HGLELGHAL
YTKAWEEYY
ATYETKESK
SGAKFRISL
ISFENVDTAKK
SSYTVPLEK
SGPSVLRSTL
RALEIYATRL
RSLESALKDLK
GSGEFGSVFK
ISMPDVDLDLK
KGPLPGPAAGL
RQMEMKILR
KTLDQAKAVLK
ESPRLPDGSSGL
YSTEPNNLK
WSIEHVEQY
HPEYGSRIQAL
TTPYVQAFDSL
TFYQIGDSWEK
RSIGTGGIQDLK
SQLKLDHYRAAL
RSPHIETYL
RSPDFASSFK
VTDVKFAPK
RTVSFKLGDL
RVLDLQQIKGMK
YNMELGDMSL
FGPALSVKV
KAVSKLWGK
YSIQKVIGF
FGFELVKK
RQPSIELPSM
KGLELIAEHL
RGPDFVRTL
KALEHLHSKL
PTPAFHSSRTSL
RGLHHKLVYK
QAVPWNAVK
SSPTFLRALM
KVFVGRFK
KNLSASQKALK
EMPFPKYPVEP
SSPYFKVQLY
SSFEGKSIIK
RVLPQMGRLK
KSIKVENPAEK
SSFELIVQK
ATVGISGRLEGL
ANLKNTAEK
SSLEGFLGVTK
SGMNFLEK
VSPVVRVAV
QSLTDLQVQKL
LGPEHPLASL
MAAAAFVEK
RNIKLEHLKGL
WSPAMKEPL
GSPLLDKELSL
TSFSFQKEK
KSFLSKGQVLK
EGPVFSSGHDL
QSLELPLRIHGL
TSLKIGIVGL
GQPAFLQSREL
VSNMVHTAK
SSVAFTPLQGL
AALPAGTAAENK
YTIKKPVGK
KSLLIQELSK
ATYAPVISAEK
KINGNMGLAMK
HSPPLKSFL
NSPLLERASL
ITGASLADIMAK
AVVEFQRAQSL
NGVQIKANGL
YTVKVTAINSL
VSGASSQPTFHSSL
SSLPSDVVSALK
GSYRDALRYK
RGLGAKKFYGK
NALWEPKPK
RSGPRFKEAL
RAMQWISSKL
GTLNQPVTKL
LGPALKDAVLEL
HPTLPAGRYYL
RGLVLPVGGIK
TGPAWSPAQSI
IGVKFVGHGL
RSKEHERPR
SGASSQPTFHSSL
NTMRLGSIFGL
VSIPQQSQSVK
SGSVLLFVTK
SLTSTSALEVAQK
GTMEWIMIK
RSLQADLRVTR
AAMSPGEMEK
RIFPKEMLK
RSFQDNLHNRK
SGPLILTHI
TNPFFIKTL
AGFLIGDGAGVGK
GSFQGPRKK
RTLLQQDVKK
KAEEILEKGLK
YAIDNPLHY
ASIAAPFTSKL
KSLAFEKAK
KRSSGMSSLLGK
RSIMSFFQPK
YTVEITQQPGL
ATIRIGLATKK
YNPHLLLNTL
RAPSLRSLYSL
RPASSSNTKLIEK
VAITGFFQRK
NGPEFEARI
RIFYDMKVRK
TSLPKGILKM
RSFSGLIKRK
VTSALPIIQK
SGPELRRSLFSL
MSLYNVSINLK
VGIIVNKQVK
RAPRLPITGL
TGPSIKIWD
HGPLITFHL
HGPLLTFHL
HGVKLVLPSL
VSPVLFQEAL
AAFEYIITAK
TSLPWQGLK
TGYTYILPK
AIMDAGIFIAK
LSFETTDESLR
RSMMSSYER
GNPLLHAQL
SGLNFKDVLK
QGPYFHINQ
QVIMSIRTK
KALEAVFGK
AGFEMQPK
AAFPLEPKF
NTVDLVNTHHL
RAMQQQVQKL
SALPIIQKL
VAMRALGFEPK
SSPSLPIHGL
KAYHDPMLKL
KSIPLSIKNLK
STVDLGGPLH
RAFDGFLER
QSFLDPSVTRK
YDPFMHLESL
ISMPDVDLHVK
SSPELFNSTSL
MGPTLRVAASTL
AIFKVLNEK
MYSGELKFEK
TAPNYRLKSL
TNTVYVFAK
KSIDFPLTKV
QAIKGMHIR
VSLGLDENVSK
FDPELRIMA
SVLNLVIVK
ATLPMPDDSVEK
GPFVHHGL
TVYEEMMAK
SIGDSSLHIILKK
YGPGPLDTDMQQL
RTIFPLFMK
RGLLAGLLQRK
KVLGQGKWNLK
RSMMSAYER
VGPDFSASVIQM
RPLEMIEPR
RSLLNWRTK
GSIDRMFDK
LSMDTKMILK
YGPVVKVVF
KSLLGVKENNK
TNPRFEAPL
SGPQLLPVR
VAFQDLPTRHK
NNPQLKEGL
SGPELRPLLL
AAITMDKEYQQK
YSVIIKTLL
KSFKLSGFSFK
AAKQHLTPK
KSFEWLSQM
SLDLDSIIAEVK
IALGIPLPEIK
ISYQGIEPKL
SILEDYANYK
KAFDLIEHY
KALKGKEPPK
ESIKNQMTVK
GAYGYSNPK
LGPVLVKQEL
KNYYQDTPK
FGPSVIRGLL
KDAYPKKRKSVVQD
AGPPPPSTSSL
YSYGDFLLGK
KQYTGINAISK
KGFEYILAK
SQPLLVANAM
KGPKLKGDVDVSL
ASIFWLKK
HAVGIIVNK
TVIHFNNPK
AAPGIAVHAL
SAFKVPAPK
FTVQIKDEEGL
VQMQLRTSL
SGVGLRLTT
ISMDGSRSYKL
AAIPLPLVK
AAPGLLAGHGL
KSINEFWNK
KILSSNNDARK
RNPQLRSVAL
ISLQHLITKL
SAYRNKFTQK
SMLDLRQLETL
QSMDISLTK
ASHISKLPK
VGPELKNEVL
HPELVSGTFL
RSLFIDRTIVK
MSMENKPLY
AGPLLRPSVAL
TSMYLVSGGL
KAMEGIFMK
KSLGHGLINK
YGIPFIETSAK
ATYHPWIIR
TPMDMGTIKK
KQLADIGYK
HNPSLLGNQTL
EAQRFFAQK
AALVMTHLILK
VALDSSNLTNK
NAMKIRDVTK
LSIFSQEYQKHIK
SSPNMANTVNAAL
KSLELAIGRF
GTMPLRNIFK
QALNQLFEK
KGFGFWPAK
NGPEIMSKL
LTVVFVNSKSL
AIIPSKKLRNK
HAIPIETAK
RTIIGGEGEKK
ASLLLHNKF
KSIDFPLTK
VTILMRAVNSL
SSLEFKLHRL
YALPLGRKK
VGPGLGRDDALL
KAKVFEHIGK
MVPPVQVSPLIK
LGPDALTVHL
RTFPYPGVGK
FSFDLTPLTK
KGFGRGGAESHTFK
SVYVLVRQK
FSLKTPPAK
SNFEKLISK
TSYDDLIRK
RSIKIPVKKF
VGPETLLRSL
AGFDATNILNK
WTPTLQHYL
VSFDTDTGLK
SGLIALLSTGSK
GDSSLHIILK
QALPWVRY
KGLDFLHSKK
TAIKNKYASSK
NNPKLRIISL
SAMPPPPPQGVK
AGPAPGRRLVAL
RSLNEYKALK
NNPFLPQTSRL
TAFDPFLGGK
RSKVELTRY
MPIANPFPK
HGPAMQHFL
VVVAVWPTK
ISDRLIGIYK
AGFRQKNQTSK
QGTKIASDGL
HPSFQVKEL
RAIYQATYR
ASQLGIFISK
RSSLLVGNLKK
KTPYLYSHSI
KNFEFNKQK
RALAAFLKKSGK
RSFILKKPKL
SSLFELAKK
KSAPATGGVKK
ASKAGLVIGK
VAFPTGKFTVK
RIHPVSTMVK
QSIALQIQKL
SGQGLHVTAL
YSILIGTNK
NRAATLMMLGK
QAFTDSLQK
AAFGPWIQKY
RSLKEEGVQR
RSFPFVSK
AIIKMHIQKL
FEFKSLTDSL
STMNFKIG
LSFETTEESLR
VAFQFPTKK
FVQMMTAK
KGPEFLENGITL
LAVQIYEEARK
VAISLGFLGGAK
KGLPAEVYK
MGIEFREG
TSYEEFTHK
FQMEQYIYK
VKPSFDPNLSEL
VSKKPNAPK
YGFQIHTK
HNALRILTF
SAFFLGLTAR
EALPLTTAEGAAK
AAKKFGPKSSK
TVTEIGKDVIGL
RTMPWGSFPAEK
RNYLSIFRK
QSMENGLNYM
KSIEPYLKKK
MGLAIHQVL
QGLLMPVVK
SSIQGQWPK
HGPEYLVR
FSIRSFVSKM
YALTGDEVKK
SEGLAQTVPK
TQLNKFYTK
GGPAVGPRGNL
YSLDEIRRY
KGPSFKASSL
SNPELSTAASLAL
AVLVMGVSGSGK
SSMVDNHTK
SAVELGGKVSL
RAMIENFNAK
LSLAIRSPSL
SNVELRQYL
ANLKLWFK
FAQPNFKVDGI
VKPYFDDKEL
INEGKLWKHIK
KTIKLWNTL
ATASIGVIHK
HSPLFPEMQ
ATASLGVIHK
SNNELVRTK
SVLNMVVSR
KQLSSTVFK
LSPNFREAVTL
KNPALKAQSGL
ATLPIKLPRL
FNPYLGPVSPSL
GNISLRHYL
AAVEVTSTSVK
RIVYLYTKK
YSLDLPPFVTK
SSVESIISPK
YSISVPIFK
ASSQALGTIPK
DSPFLKEVL
TSLMLSLNHPL
INPLMSPKLAL
FGMDLKRGML
IILVHDLTNKK
SGPRLKMPSL
RGPQLQGRAVL
YGLPVVVK
EGFEIMIGK
DPLEFVGK
ENPRLIASSL
NNPDFKAGVM
RAIVWLAGY
RVLPEFKKK
LQPTFTPMRVAL
KSYSQSSNLFR
ISQEPFVPK
KSFHTYDVQK
AGPYFVSEDNM
FAFEGILTK
GAFLVLPLGK
TALRLITAL
AAIEAAAKKL
TSLALGRGAFL
KAQIMKEIRK
SIFQMFQRVTK
GQPEMGDKNRHAL
ISYPLHHPK
RQIEGLKLLQK
GPELHEKL
AQPLIRAKFF
MGPLMKTASI
SSPQIRVNL
YGYAVENAK
YGPGIRVDEV
YSITVKELKL
AGPRLPLVMKL
RVFQTLRDK
SSLHIILKK
TAFGYKGLK
SNPLFRTSASI
KTFEGNLTTK
LSLKISIGNVVK
FGFEIIETK
YDPNFAIR
HTVGFTPPTSL
SSPELMGVGSL
KSTELLIRKL
TSYQWKAER
AALGRPLDK
TQFPFKLSEK
LGPVLRKLTEL
TAFRNKSLLYK
SQLRLHLRQK
FALPYIRDVSK
RSFPFVSKT
STPELRRTWL
QAPHLAGPHLGL
LLVVYPWTQR
KPVFHVGFL
KSYFSGMSK
STVILHSIYL
KSMFQRTTY
AGPAWAKAL
LSPDLSLGNATVL
SAPQVHIFSL
QQLSFPVRAYK
GGMQIFVKTL
FSAPTPIQAL
RALRYYYQR
GQLNHLPLK
WAIHTGRYK
FAIQPNTTGK
RNLPSGPSLK
VILDLPEHSEK
GGVYLQFEEGL
RSFDFEIETK
RTATLQEAMK
RGYQRPYNY
FNTILDDSHVL
VGVGWRVDY
NGIDLKAFL
SASSLINPLTK
RGFGIGSEILK
SAIASTKVMK
RIMKIDIEKF
NGPAFMETASF
ASLADIMAK
NSPVVRAENL
KAHVIWKK
QQLPMTFGNK
ESWPVLVGK
RSLEVLIGSGY
SNPKLLQML
KNFQIEVQK
STVDLRAVL
RALRMLPSTSR
SSMVGVNLPK
[truncated: 5,132 more rows]

## Sheet: 500004_A10
MGPALGAGIERMGL
AGPVMPLGGRHAGL
KGPSFDVQVGLHEL
RGFVTGGADKSVK
RSLGSGHLQGKPWK
KSYSYMTEKM
MGPAIERMGLGM
STASALTKLLTK
RSFGSEEYTSGK
RSILYSAGEFQKAK
RALGQNPTNAEVLK
AGPGMNLSHSASSL
VGPELQEPLRVAL
HGHGPSPFLRITL
RNPSLPNHTEL
KAIQGILGKSMPK
AHASSSNIGSFLEK
KGPQLPDFERESL
KSPHFSAKMNSL
REHSAFQAPAVK
TSMLITQGLISK
KSFEDPPNH
KSFTYEYEDSK
HGVDLSHIYGESL
SGPYLNKGRIAEL
DGPDFLSEEDRGL
AAITMDKEYQQK
MGPVMDRMATGL
TSVAVTSALPIIQK
RAYEVLKDEDLRKK
VGPQFSMNHYM
EGFSIHTRDSPK
RALTQTGGPHVK
HSMVYPPSAAKM
MGPAIERMGL
KSFGASGGYIGGKK
TAFQGMLRKL
VGPQVAGDTHGGSL
SGPVLGGKRMVL
KAMARDEKNYY
SGPDLDLNLKGPSL
RNPKVLNPRGL
YTLVITDKEKAEK
KAYPNNYETMK
YSALFLGMAYGAK
RQFAKFLQR
SNMEIGMKVALEGL
HSYMNAAGVPK
RQMEMKILRA
RAFMNDPAMNR
AGPIFMNHREQAL
RSLPAPGPSPSDKK
LTPLLGLGPNPGL
KAYPLADAHLTK
MGPWSGSRLVAL
SSPHFQVAERAL
RILQEDPTNTAARK
RVLEPGPLPRTK
LGVHFSKVRSL
NALDLMENKTFL
SAQGSDVSLTVPKV
LSFEMHPDELIEK
TAILVGGMSTQK
AGPEVEAQLRNLGL
KGPKLKMPDM
RVYWSTTDARK
MQKEITALAPSTMK
SGPHFSPEHKEL
STSGVILSPYKSL
SGPQFITNSEEVRL
KSFEDIHHY
STMEWPIDGGTSL
IGPVYSSKAARSGL
RIFAPNHVVAK
RVFVVGVGMTK
HGIQPDGQMPSDK
NGPELLPRVAML
RSVSSEASSSKK
TGYVIDPIKGLK
SVAVTSALPIIQK
TGPNMGGKSTL
RTYPDDFNSNGK
YGPHMEAVRL
RGYDSDPVKAWK
HGLIIRVKGF
HALEQQMQKL
SQPIFAQQDNWGL
LGPLFKSSPEPVAL
NSFEFKSLTDSL
KSYVFDSDVASAK
RILEMNNKYVK
SGPEIKGDLKGSGI
RTLTYMSHR
RIHENGYNFK
SGPVLGGKRM
RSMMYSGELKFEK
EAMEWVIHK
SGPWLAHVI
RSMMSPMAER
SSAFFEEERSAL
TSFFLGEVGNAAK
VGPEFGKKRLGL
RSTASALTKLLTK
SNMALGKFRAAL
RAFLIEEQKIVVK
KAYPLADAHLTKK
KALETDGVSGVSK
AGMGMEGIGFGINK
KVFPIAGEPLQK
FDPFLGGKNFDAKL
KAFSAEMEKNK
NPAVFPHLTVVL
RVITYLDHSTQK
RHYWEVDVSKK
YGAQFHPEVGL
RSYESQMVIR
RAVQEFGLARFK
SNPDLHLNRATL
KSYLMNKLAGK
RSPELALPRGM
MSPALHTRNKEAL
SAIKQESEEPPMK
RAFNDPFIQK
KSLLAHDLKLTRK
MSMAFSQKNPK
NAPHLQLVHDGL
QSYDYGGSGGPYSK
LSYPVNPEDIVNK
SSFFVNGLTLGGQK
NGVVIHLPGL
NSPLLFGRLNGL
SNPALNDNLEKGL
FAYKNVKFVLK
SGPNFVSQSGTLTL
PVNPAVFPHLTVVL
RSYSESEKQWK
AAPELIQGKSYL
KSMESSLKYINK
RTIATALEYVYK
NAPQFKANHAEL
RALPEFFNGK
TASALTKLLTK
RALPKSYQQPK
FVLQLDDEHSL
VGPTILNKMEAAL
GLDALSSIISRQK
AGPELLLDSNIRL
HNVEATSMFHL
RAMQWISSKL
YSLVIIPKNW
PRIVKWDRDL
HSQSGFYYK
DNPSFAQDHQL
GSLFMDTEKSGK
NNPLFQYKYLAL
MGVHISRIQSL
SSMPQKFIGEK
SNPSFHVGAITSL
GVHGGMINK
GSPSLQHSRDDSL
AAFKELQSTFK
RSFDTSLVRKT
RVQEAVDSMVK
KGVWSTLPVNEK
IQRPPKIQVYSRH
QNPVIGSNGYFL
RAFDDDSALLK
AAPFFIVRHQLLKK
AGPLLSEEDKPQSL
QSHDYNWSFK
VSGASSQPTFHSSL
RQLTQAQEFSHK
KSVAVNFLLTAK
KNPGFEIIHGL
RTFSWASVTSK
RALSTGEKGFGYK
NSFRYNGLIHRK
LAIRSPSLLQSGAK
FNAEYDEYRAL
AAPFFIVRHQL
NSPGLQSKEPSSSL
RSMIPHLESGMK
KGPKFKMPEM
KAIETDKEYY
FGYGLWHSEEATL
KSFEVIKVIHGK
STMGYMMAK
SAMKIFVTTK
SGPDLSTAILHF
VGPRLDHERAKSL
TDPELGGAVQLMGL
FGWSVHAPSL
ISHIVTYYSGK
AAFQDSLFTRK
MSMVANLLYEK
AGPSFLAHLQTL
RSFVIDHQRL
SGPQLLPVRAL
RSFHPMLRY
KEITALAPSTMK
TAPALSSSVRTKAL
KSLELIQGEPLNK
KSIQLFKETSK
RSLMTQTLEAVK
RSFTTTIHKV
KAVELNPKYVK
RGFEKIMKR
GDSSLHIILKK
MNASSGIRHAM
FSNKITPVQSKEAY
KAFSIGKMSTAK
GSPAFGSLAGGSIL
HSPGFSYNLETNSL
RIHFPLATY
HSLPFSLTKM
NGPILDKVVTAL
KALIDYENSNK
RSFDTSLVRK
MSFLLPKLSSK
KGPKFKMPDI
FGMDFSRSGLGL
ATFDLSVQGSHK
SNMEIGMKVAL
RVLELVSITANK
SAYTIYMGKDK
RGGSSGAKFRISL
RILSVETEFHAK
KSMNFDNPVYLK
KAIETDKEYYTVK
NSFNLKDMAPGL
SDGSSLEDLVVK
HSPLFPEMQSL
EGSYVGQHSQGL
FNPYLGPVSPSL
RSMEAHNILSK
SNPKFAEHGETL
RSAHLNALKM
NGPEFEKMTM
KALAAAGYDVEK
RSMVEKMMY
RAFPLFTHR
KAIEYVHGYF
YTLDVTTGQRK
AQPVMQTKRTAL
VGMNFKTPR
SGMYHGDLTEK
RNPALLKSVSL
AGPHTSQAMEVDGL
RSMELGGRISAL
KSIYYITGESK
LLGSSPEFNSQFGL
RQPFFQKRSEL
RQMEMKILR
MGMEGIGFGINK
TSPTLMNSQNQSL
RQLTHIYHY
KSYSYMTEK
AALKNPPINTK
RTMNIKSATWK
SAFGVILQTPK
YDIAFHQDGSL
DNPYFGAGFGL
TSGVILSPYKSL
TSFYLPKDAVK
HNFAWPLENTL
YSLEMYQKM
QNPSLHHPRATFL
RDITLPTKVRL
NNPALSGENLIGL
RAMVVAKLLEK
FSPAISPTHPGEGL
TSLAYFEDRHGK
KALDWALPQQR
KALSTDPAAPTLK
IQRPPKIQVY
AGPGFGGARNPAL
TSPELPDHPYYL
QPRIVKWDRDL
VGPWIQTKM
RAIEINPDSAQPYK
RSLDLTNQGDAREK
RALPKTYQQPK
RSIAWEKSVNK
RQIGLKNEASLK
YEFDLSPLKSL
RGPGLSVQHTTL
NNPKIHLAQSL
ASMDKYAVFK
KALDFIASKGVK
VAYNTQGPNGPTGK
YDIAFHQDG
YAPEFHQRPGYL
GAWTYNTTSAVTVK
AAIGLAYDRKKVSK
HSMDYVAYR
HSLDMKFSY
RALRYYYDKNIMTK
RIIEKVIYR
ASPVVHIRGL
SGPTYNENNAAL
SGLPADAQTRATFK
KGPKFKMPE
RGLDISHISQR
FGPDFPGAHFL
SHSMRYFLTA
SNLPIWVSKL
KEDSSSTEFVEK
LGPMFSGKSTEL
SSLPGDMENPK
RIIDLVLQKH
DWVPYINGKFKKDD
SVVSPSSFENVKEK
RSMVLKLTLR
RNPEWGLRDTSL
RAFSFSKTPK
SAADFDDRRGVL
AGYEAQGARPK
RQIPYTMMK
SSPKLPVSSLGL
HNMDVPNIK
VSQAGTGFSFNTK
RAILMELERVK
SAMTLPLWIGK
ATVELIVQSHAGL
FTVTFNPKYDTL
NAPKFRLHSATL
SAPELPQRHNSL
HGYIPSKFPNK
HSIIQDFTK
KSPEWSKFLGL
RNPEWGLRDT
SSMSLQMGY
RAAPGAEFAPNK
YPMAVGLNK
FSADAARFQIGK
SGMVQTEAQYK
KQINLWKIYK
AQPWLSTSTEGL
DSPQWSQGLTL
KSAEFLLHMLK
NGPRMGDADYL
LGPGLNKAGKFPSL
FGFAIGSQTTKK
RQPFFQKRS
MNTVLSRANSL
RSLPAPGPSPSDK
AALDIGVPDVTLK
KSFEMTVEKV
RSGPFGQIFR
RSGPFGQLFR
KAIPVYKVATK
ANLDYKVGWK
KSLDVNQDSELK
MTIKNKYATSK
FTIQYILDTSDK
AALPNHKPKGTFK
ATFPLSVQKF
SGPDLQEFISGNL
RGLVVSPKDYSTK
KGIEVDTAHYK
ASLKNLETISNK
KAFDSIISKGHK
RTIFPLFMK
HVMEVYSWK
RILDIVMQR
TTIHYDRITSL
HSMDMKFTY
TSPMFMEKVSL
YSFFMPAAKL
SSFQFSVQKL
SSPYFRDHMSL
SAPFLQPPLAL
GGSSGAKFRISL
TGVLLHPEWSL
LSPYYKVFEEDAL
KALPNSEDLAK
NKLSSLEGAHTK
PGPVFGSKDNFHGL
RVVDSKDLTTK
SGPKLEDGRVTI
DGPYYDLDAVL
RAYDYVKER
SGIKADVVSSTK
KGPKFKMPSM
GPALGAGIERMGL
RQYMFPSLK
STPDFGFGGQKRQL
FGPALSVKVM
QQPHFPGLTRGL
KGPKFKTPEM
KAIEYVHGY
ASLTSTSALEVAQK
VISDGSSLEDLVVK
KAMEGMLEKNDL
SALFLGMAYGAK
RALEEAMEQK
RIMKNAIPQTGK
QSLELPLRIHGL
HSLEIIHGNVK
HGPAMQHFL
VGPFLGKFPEL
GSSPFFERSGL
RSLPELAQHK
RQFPGSHRVK
YNPGLLVHPDLAYL
RSLPVPNKSGPK
TYSLGSALRPTTSR
HSLLDDKTQK
KAIEENNNFSK
KALEENNNFSK
MSPTLTMRLAGL
NAFRIIKEVQK
RVLKYVDTNLQK
SGMELLVNNKIISL
RALHGTGFLASK
RNLKLKLHSF
KTYTIKEGSMK
QGFMAPKQK
ESPVLDLKRSVL
YGPNPGHMPSL
KGPKFKMPD
RSFPFVSKTL
SNYNLPMHK
HGLELRVPFL
RAMEDGGVKLLK
NGVKFTNSKLTSL
SNMHFTSSSTGGL
SAFQAPAVKK
RSISQSISGQK
KALESSLSLINQK
FSYGLQTQAGGPK
ASYHISNLLEK
MSPPIGTVTPAL
FNTKFKNRATL
RSLEGTEAQVFK
KGLDYLHSEKK
MGPGTSLRHLFL
KSPGFASSKADSL
RAITSDGRYM
GSYRDALRYK
KNFEWVAERVEL
VGPVVGGNPQITL
NGMELLRLPGL
KSLLIGVFKH
RSSGSPKFAMK
STMAIIVNKL
KSFQQELDARHDK
KSYENELDPLK
RSFYPMLRY
KSVEMHHEAL
KAFAMIIDKL
FDITLNHNSAL
DALSSIISRQK
KTIKIWDTTNK
SSPSLGEKQYFL
YDGSALIRASGK
TGPAWSPAQSI
GTMTGMLYK
RAKSFFDVALK
HVLEAQDLIAK
MTLPLWIGK
SGPLFNTDYDIL
KSNNSMAQAMK
ESIDNPLHEAAK
SGPHFFSDPVSL
PSLLYKHIVGK
AAPLLSVARAAL
RSLAAHTPTVLK
HSMQAGYLEK
KQLIVGVNKM
SSFLLKFIQK
QQLVQRVPKM
SSLEFKLHRL
KAIEMPSHQTY
AKGVWSTLPVNEK
KGPKFKLPEM
RQIPQAAASMK
SSPDLFGSIHEDF
SSPSLKGKLKSQL
KQFAEMYVAK
RNFVGPPHFK
ANMPWFKGWK
ISPSMGHSLDVGL
RALNILTGKDWK
AALPAATLWYK
PAVFPHLTVVL
TNQFFAIKAL
LSFDYKLVQK
WAPDLGAALGRAL
KSMKMVAAAKY
RTLNPQMLQKK
SGPIYPGHGM
KINGNMGLAMK
RQLLDDEERLTAK
ASYEQQLEAVK
MGPGLRPLLPL
HGPLLKHEAL
HNPSIGEGSVGGL
KSVNFDMTSK
STVQFHILGM
QTLTKQDTMLK
RALPMAGPEPMK
STPEFTVDLKGASL
SSPYFKVQLYEL
RSMYWPVRR
KSSTITLDQMK
GSLVFVVGKM
GSYNKVFLAK
RTIGISVDPRRRNK
RGPLLGHTDAVWGL
SPTSSQPVFDLHSL
TTFVLGSRANK
SGPWLAHVIQTL
QNPGFPVNKDVTL
AGPEFKVSAQFL
KSLDGDLIRTQK
RGLDNTEFQGK
KSYSFIARMK
STVLFGIVRSL
QSLPPGLAVKELK
DSSVYFRSVEGL
LGPDWHEGLDL
RAISWTMKKK
MGVEVRQML
RAFLMQHDSANK
KSIDLQEPLQK
KSMESSLKY
NSPLLSALKGL
HAFKISKKYK
VQFHILGM
QNQLVIWKY
FSNELISRDEGL
MNIKSATWK
ASIFVKDNVTK
ISMPDVDLHVK
RGMSWEEATK
YGINTDPPK
NTPIFFIRDAL
YIMEGVKATTK
RIILYDTSSKK
KGAGLGAKGSAYGL
SGPALVTPFM
RIIQHLMDK
NSPEFQKLLGI
RTLGYVDEAGTVK
STVVLANKVSSL
EAYEVLSDAKK
FAFEGILTKK
KQYDSFTHK
KAPALPGSSTGL
RSFFLGVPRL
EIGSSPFFERSGL
MILAMNEKDKK
KQPSYIGGHEGL
TGPAFARGWWL
ASFPMYGR
SAMYSRKALYK
LGPDFQGARYL
RAKASSLSEELK
GKNWKGLTGNL
STIHFYNLQEGL
SAFNLSELARK
SSIENKQDWIK
IALYMASQPRNK
HSMVIWHLK
SGPSLNKENFIGL
SSPELLRAVTL
QAPMFRPDTTHL
KAYQIDPTLAK
ASYKWNVSR
FGPLIGQQSHSM
KSYSQSSNLFR
ISMPDVDLNLK
KILTFPEKVNK
VGPEFGKKRL
KSPYLYPLYG
MSFQAAAALLK
ATVDMSHNQISL
RQLQLAQEAAQK
RDGASSLESKLK
RALPEVHYR
SGPYLNKGRI
EQPRIVKWDRDL
HQLPLPHNVSSH
RYSALFLGMAYGAK
VNLALDDVRSSL
ASLEISRKWEK
RSPHMKADPGL
KAFGASKTFGK
RSFSDPTSKM
STVEFLLSKGATL
SSFKDFAKSK
KSLEDKAAEVVK
TSFRTGNPTGTY
VAPTLTARLYSL
YSYPTKQAALK
VGTVWINAHGL
RSILYSAGEFQK
ATIMGVRFK
ANAPQPIFK
KTLPYFIRNK
KAYEQAGMMLK
RGINGGPSRMSPK
STVFWKSGNAL
KTYQDIQNTIK
KNFQLNQDKM
NAPQMPPGPGPHL
RQLTEKFTAK
TGAAFGAMNGL
HQPFLHETL
FNPYFPGQAIGM
STVTLEHEHSL
SSIASSASMPYK
FDVSFGDRVLL
YAYKTIKDDKK
SNPYFRNEGL
TSSGSVLLFVTK
RGVRFDVHDVTL
SALQILFSEDSTK
LSMPDVDFHVK
SSMPQKFVGDK
MGLEVPVGK
QSMDSKLSGRY
HTPLLPSTTGL
RSFEGLLGRAK
VGPSLRMFF
STPLLTVRGSEGL
RGIDLLKKDKSRK
YGMEFRLKTL
RSLVDYENANK
SGYKIYPGHGRR
SSPEFKIKIPRHEL
KSFEDIHQY
KIISIFSSTEK
KSMSFPTGKSDR
HSPELIRVQL
NNPKLRIISL
SSFELIVQKL
YSPEVSSKAYL
RSLFNNAERAK
TSPQFQQALGM
NGPGLSRVRESL
RSFPFVSKT
VAMSMVQNR
DGSSLEDLVVK
SNPEFLYVEGL
NDPALRHTGL
RILFDNAVKK
AQKFPINTPK
KSPYLYPLYGL
KALEAVFGKY
AALEGMNGIQK
RAPDFHDKYGNAVL
SAYTIYMGK
TSLAYFEDRHGKK
RIYNMEMARK
MGLAAQAFHY
HSLEEMASKL
FGFAIGSQTTK
AQFHFTGIKK
GKASQLGIFISK
RAPSWSERWPL
SNMEFLFNK
GNVDLSKLEVSL
RVLDFDVKRK
AGPLLRSNGQSL
KVQEMNYIQK
SGPQISVPDVDLSL
YNPAFEDHQNL
STVDLGGPLHSL
EKAENSSLNLIGK
YTLEDQKATEK
EGPAIWKTRL
LGPSIDTHGETFL
ASILMKFQELK
SAFFPFHEY
AQFFLGTTNK
QDPQFGWDHSL
TVLKLQGQASTK
KNFITIKDALK
FGPEVGQASFF
AALRDYETVVK
FSLADAINTEFK
RALDDFVLGSAR
SSFEATINKF
HSFSLQITK
VSPVLFQEAL
NGYGFINR
RSVTWTSDQSGR
KSFVKVYNY
RNLPWVEKY
KTFEGNLTTK
RILDAWEMNEK
KALDDMISTLK
ISVYYNEATGGK
NDVEFREVTEL
RILSGPFVRK
EAFYIKDPK
RIMQIHSRKM
RTATLQEAMK
NGAVFRPEVPL
RAMELLKVSK
AAMLMPHQK
HGPAWRKKYSL
RNMTMQRTMK
ETIEFVRATQL
ASPSIRLPASL
KSFYQFQHY
RSIPDGSEKGDFI
VSPVVHVRGL
KGPTFSDKGGL
KSVEMWQVKL
MALNSAEKITK
RGMDLRPGNAL
SGASSQPTFHSSL
RSHYFEGVLK
TSALPIIQK
RSKKTSFFR
TAYLPMLEK
KNTTFDTFKASL
RSFTWQDQHK
KSLDTNEEGGRK
RQYDIDEAIAK
RALDDDIRHQM
QTVQLLIKKNQTL
RMFLSFPTTK
SVLHGMVFK
YTIYMGKDK
ASPNLIGTTGANSL
IAMDMILKM
RSYQPLPETKK
RAMQQQVQKL
FSPVVDVKKTAL
FGPFFRTEQL
SSVAFTPLQGL
KSIDLQEPLQKK
HSPGLHPYTAL
KNPEFNKMVL
KAYQALKATQAK
IGDSSLHIILKK
RSIQVDGKTIK
AAINWIEGRGK
VGPELHDRLL
RSYSDPPLKF
KIINSAKTGSFK
VNFPFLVR
HSIDGRVVEPK
NNPLFQYKYL
SSPFFERSGL
KAFAMIIDK
FTYDPWIGK
RTLHLPVSTTL
ESLKKKLGY
SSPEFSKTLQL
EGPKVKGSL
DAPVFLSHAEL
RSLFQKNPMGK
VAITGFFQRK
RTFSYIKNK
NTVDLVNTHHL
WSPVFRNYI
KNVFFQTSGL
YSKEFFTKK
RILSGVVTKMK
KSMEMLVEH
HAPDLLDQGDWSL
VAVTSALPIIQK
RALEIYQTKL
KIIEESEETLK
VSMPDVELNLK
DQIVLQWERVTL
VTPDMPNSPTL
RSLSVHSGSTGSLK
HGVKLVLPSL
TAMPLPIGR
AAMPFRGY
AGPVFRTHEM
VNPQLPSKQSM
SSPELFNSTSL
YNRSLNEYKAL
KAMEEMNGKDL
YTLDDMFVSK
AITGASLADIMAK
SGPQISVPDVDL
RSMQETVNKL
TSPEFQEMSLL
TVYEEMMAK
RVYNWDVKR
SSYKIITGR
KGLDFSDRIGKTK
RQYDKFLTH
KAYHDPMLKL
RAIVWLAGY
AAMLDTVVFK
STIKFQMK
RSSLLVGNLKK
SGYDYSYAGGR
NSPLLFGRL
GGMQIFVKTL
SGPELQSLDEFTSL
AAMNGHTAAVK
FEDPKFEVVEKPQS
TAFGLLVEKL
SNPDLRRTEPVL
RSFTYIKER
YQDTYGQQWK
RSMMSSYTADR
SAIIDHIFASK
VSMLNVFLK
RGFTDSPHY
ISMPDVDLDLK
APSALLRPFWK
RADDMKWAQK
VGIVGKYGTR
QSIDNSHSMVGK
FVVHMKQKGKK
ASYTKIVVK
KSLHLPKNNSL
SAVTTVVNPKYEGK
FSMVIEDGIVK
KVWDVESGSLK
RIIFPGTGY
GRGGSSGAKFRISL
GTKSPWPPK
TTFTKIVNK
RGYSFTTTAER
ISDRASASPSFK
KAIELNPANAVY
FGPEWLRAL
MSMENKPLY
YNVWLRAQL
ASLQQPAQPVAK
YGVFPLRGK
HPAFSHLRVL
YDPNFAIRGL
YSMKDDLENVK
GSMPAMPLR
KAFDLIEHY
ISMPEIDLNLK
GTMTGGGSKVMK
TTPYVQAFDSL
ASGPLFHGR
KAPGFGDNRKNQL
GSLELMVHR
SGVDFRSSERL
SAFEMKVYY
ASLKDLYKSLK
LSPHFPHTAAL
LGPALQAAFKL
KAFNQGKIFK
GSPELLIRSL
RAPTFLLGGGAAL
KVMDTIMTK
KIMGDYGIKK
ASMQAEMELK
RVIDPKKAMAMK
RQFQQGAAGNMK
QGPLISKDLPAL
KSFDASGNGY
FSLTLPPGKIVAL
AKPVFHVGFL
RGLRYYYDKNIIHK
KGKDSLYAQGK
AMFNIRNIGK
SGPLAGSREQAL
EAIQAQKIWK
RGLEHPLFPK
RSVQLPDGGWGL
NGPTAKAHTGL
RSLTLNVVNR
ISMPDVDLHLK
AGPEFKVSAQFLEL
SAIASTKVMK
SGYQPPRLK
HGIMSPLAK
ISMDIFVRKF
RAFDIIDRLK
SGSVLLFVTK
SVSRGSSLKILSK
VVYTSEMALK
RSLQKGTFDSK
TTLAFKFR
NGLQIKGQAM
KNLGPGMTKM
RIMDRFNLPR
KNFDEAAKVLK
AALQLMQQK
SNTVFRKNSSL
KSIKNIQKITKSMK
RIYKNVMSK
LAYEQVAKALK
DGPLFRYVL
KVLENIELNKK
YNQDLSVRGK
LGPDVGYEAIGL
KSFEELEVPK
ASQEIAEKALK
HPQLSQRHSL
SSPLIDTERNLGL
WGPQNIRVNSL
IGPALKAVGLSL
YGPQITVKRI
VGPEITKTDL
LGPQFVERIIL
FGPDFPGAHF
GGTILGTRNLKGL
RTLEKALEKM
FNPSLSKAMVL
KAKEPPFVRK
NGTEFSVKVSL
SSPDMNETHSL
KAVQFFVQAL
TGPDLTTYGELVL
KGISIYPETLSNK
TQMMIHSKSL
ASYYGGRGVGGIK
KTIDYNPSVIK
NSILGKAVFK
SSAHWPIFK
ANVKLRANAL
TAFQGMLRK
TVYQVMEESQK
TSLQNGRMSIK
HSVMYPVDSVK
KTMEDTLMTVK
RSMLDARSRF
TAMDVVYALK
PGPLLQRALSL
KVFTLPKVSAK
ESLQQVRQQLK
RAIILRDEAAMK
STPELRKTWL
TNPFFIKTL
SSVKVFSGK
TQLNKFYTK
KGVSLGSYLEGL
FEGFPDKQPRKK
KVMTNLDSLFK
KVMTNLDSIFK
YDPFMHLESL
YSFTHIVPY
STIGAGAYAYK
NGPNMHPGASM
RGPELPQKRL
ISMPDFDLHLK
SAYQNIAHY
AGINIGPVHKK
RAANMFKMAK
NTITLGVKLEDAL
VAPLLGGQQREGL
GSMEPAFHR
TAFKNFIEK
HIIDNFFVK
RAMEARAMEAR
GTYHGMTLK
VSIKIAIDKKSQK
KTFTKWVNK
RNMGYVQQR
TAPHFSFHL
FGPDVTKAFL
GSYDPQQIFK
KAYGGAYDVMSSK
SSSFELIVQKL
KSAPSDSLTYK
YSLENFMHSLK
VAAGIWGFVNK
LVVYPWTQRF
RTFGHLLRY
AALSYGHRPLSK
AALGLDPDKHLGK
RIIQHLMDKL
KQFDFLFHK
ATIRIGLATKK
KALQWTKSY
HPTLPAGRYYL
YSFLLGKEVSL
STPSFTDVVGHYL
YSLGSALRPTTSR
MGMNMISK
PGPQLLLRLGL
MGIEFREGSL
ANPTLAFGQGL
RVLDFDVKR
QAYEVLSDAKK
TGPSIKIWDL
KSITEGLLTQK
YSLDLPPFVTK
MGPTLRVAASTL
SILEDYANYK
HSLPMSVVNR
IGYDYKLEQIK
DSSSLPALLFK
FGVLFHNLPSL
YGYEGIDAVK
FDPELRIMAI
SGPVLWASHL
HSILGLLERK
KSPYLPSAHRVSGL
SSSFELIVQK
LGSSPEFNSQFGL
DNPALNAQAAL
LNPYLNLHSL
VNMKKFFPK
RVPELNVQNGVL
RIMEDRAYM
VAYQYWNTK
KNLLLLGKTYL
SMLDLRQLETL
LAPDLPSYHSL
KSLVSKGTLVQTK
NTLSLDIHENHSL
GQLEFPLPAAGH
NNPSLTVKTM
TSMSKMFVK
ISPFLGDDKQETFL
SVPVFNTKKAL
NGPLLYHWL
ASAIYRLFDY
RNLNLIKRTVL
RALDTSEQELMK
AGPGLFHSQTEL
MALPEKVVNK
AGPSFEERKKL
RAPLIRPQNSL
VSPQMASHAGL
FGIDLDTRVAL
VGPDFQKGL
RSMMSSYER
KAKPVPWVEK
KMYEEFLSK
FSPFFHPGNSI
IHLPSPVTAQK
VVYKYLTEK
KSLAFEKAKLK
VGPTLKATFTTL
VSPFLLGRAL
TGPPLKPAVTL
NGVHLKTEL
RNPEWGLRDTS
TGPIMPHSL
RSFGGVTHGPPEK
SGPSVLRSTL
SMPELHNFL
VGPIYPPGSTVL
MAIPFFTGR
NRLSGLLTGTSK
RAFGFMTR
QSYVWNNMVSK
SVYVYKVLK
SNPELSTAASLAL
KSYLLIHQR
KSYLIIHQR
HSYMDPAQY
ASDELKEMR
KAIGNTELENK
SHLWPLIEK
AVTSALPIIQK
YNPQFITKL
GAPSFPKDMGL
KAMEGIFMK
HNINRPLTM
AGPLLRPSVAL
YSIPFLGADVSVVK
LGPNVTKITL
LNTAITRAQSL
SSILDISSQKL
EAMRWFQQK
RVIEILIEKM
SGPKVDIEGPDVSL
TTLPFKPIKK
ESFKEKFIRK
ISPLLSMEAM
SSLSLFFRK
YNNSRMLHF
NNPDFKAGVM
RAYHYFQRR
ENPQLKQIEGL
KTIDMELVKRK
IGFKQHPK
RILPWSTFR
KGIGAGGSITGMK
KGISMSSSKL
GPSPFLRITL
SSPQMAQQGQGL
TGMRGAFGK
RTLEFLMRH
AGIHNPLNK
ATPALMGVGTL
GGPAVGPRGNL
AVLKFIEGISEK
SSPLFKGGQNSL
EGPGLSRTGVEL
AIIDHIFASK
TGKSGAYLIPLL
STLEFQREAI
STIEFQREAL
YSIKDLLNH
SSFAVYSLR
TPMDMGTIKK
RSPDFASSFK
RTLGDLVRKL
VPPSGPVVVVSSL
AMPHIKTYL
HPEYGSRIQAL
RIHFPLAT
NSSPELLRAVTL
FSAPTPIQAL
RALGFPLERPK
TSYEEFTHK
KGVTLGFRYK
HTYPDGIYK
TGFPYKIFK
QSYQGNPALNPK
EITALAPSTMK
FDLSVQGSHK
SNFPVVKK
AGLGLPTRGPGQAL
VVLFPWQAR
ASMPDNTAAQK
TAVEIDYDSLK
RMFSAENGK
NAMKIRDVTK
FAIGSQTTK
SAVALPKLPISL
GGPKITSKNF
KALEHVPNSVR
RGLWHPYNR
NGIILVHDL
AAMLLASKF
MGPAVQAPQM
KGFFIDTRSNK
VGIAGSTLVSK
MQPYFTSSGL
KSWEHQSESLK
MQIFVKTLTGK
SGMPDFLEK
EGPMAASREGL
NGPFINREQL
GNYLIVITK
VIMENPDGTLK
SGPFVVHWL
SHMENYKKRE
FSIHTRDSPK
RILMEHIHK
LNVDLTEFQTNL
SGPYLNKGRIA
LAYIAHPKLGK
LGLELGKVVTK
QAFYLHTTKL
RTLQYLSQGDVVFK
ANYDFVLKK
VAVVVDPIQSVK
GSIDRMFDK
EGYIMGFISK
HNTQLRTTL
SAIEWDGKIYK
GAYGYSNPKILK
RIFEPPPPK
SGPSFPITNYL
WQPDIGPYGGL
LSPQLIAEEF
FSPAYAASGGVLGL
HNADLSRAVSL
ISMKVKYQSLK
RTPALPSAVNL
KVLNIDQRNFK
RSMELGGRIS
RSPEFIHAAM
GGAESHTFK
QSFLDPSVTRK
TTLAFQVHDGL
ISIEELDIIYK
SGAKFRISL
YNPKFSKDM
KSIKMISSY
VSIPDVNVSLK
KAMEGAGTDEK
VTYVPVTTFKNL
HSISDREVTLR
LGPELLALRGL
STPKFAYGKVAL
HSPFFKVLVAL
DSPKMPLKAL
ALFLGMAYGAK
KGLELIAEHL
QSYVKMYNK
YGPDYTQHL
RSMGFIGHY
KVFNDMKVRK
TSLPMFRSK
HNRVRQILM
RAIEVVESDVK
VNTMFVSKTL
KSLTMDPHKL
SSLKDLITKM
KAFSYNGPREK
RIILTEQANEK
STMNFKIGGM
AQVDLRNASGL
NTVNLLHEASL
RNIENADKAIK
SNMEFEERNAAL
SAFGGSGMGNYK
MSPLLQAHHAM
SGPPFSDHEAL
NDPALRGGGL
ATLDFKPLHK
SQLYLFVKK
KNLELMEKKL
QNVELDPEGVAL
SNPLFRTSASISL
GGLSLRVQNSL
STLQVGSLHVK
SGPSPPQKLP
QSMENGLNYM
RIMKKTSLY
SAMPPPPPQGVK
KALEGMFRKL
VGPEFKDKL
TGIKMGQHISL
GNFNWGRVVAL
ESLPATHIRGK
SGPSGTGKTYL
YAPAWVAPEAL
DTPDFPPADSL
FGPEAPKASQL
SGYYKVLGK
RALVQIVKGLK
RAMMVGNSSY
VGPEFKDKLL
GGPELIDPAGM
SSLEIMLEKL
RAFPGPLGK
KAMSLEEVKM
VGPEQKVKAL
NNPSFMSMASNL
RALKEDFGFK
NTMRLGSIFGLGL
SSGGPFRFK
NGIEIKVWAI
KGPFIQGKML
VNLYIQDKEGL
RQPFFQKRSE
TAIKNKYASSK
NSSEFEAPSL
VNPQFKIRL
VQPWVGGQALGL
YAIKIMNMIK
SDPFLMASSSL
NNAQYFLRK
VGPELHEKLL
VAVNFLLTAK
HSPEIQHGSLL
ANARLFGIRAK
IAISPGGKYSAVK
YAPSLRFIHGL
RAMQQQVQKLK
RNPIFEFPGSL
KSMWNHIVHK
ASMPWGDPNYR
ASLDAGTNVDK
NVPKFGLAHL
RPASSSNTKLIEK
YGLPVVVKL
ASYEFVQRL
KGIEALKQVTK
RSVSWNEAASK
ATLDLNAVKAL
SSFENVKEK
NVPMFRNVSL
HGIGDVDTAVK
YGMELRKGSL
AAFGPWIQK
VGPELHHKL
NGMVGLVPK
RSFGHFVARL
GSMRIFTKKL
ATMIIAIPTGVK
AQLGLGRGASAFK
KAILNGIDSINK
RSMMSAYER
YSFFLGKELKL
HSPRFPAQYL
KGFEATPLTK
KKPVFDLKASL
FNPEWSLRDTL
NSPFLTITSM
RAYLTVHQR
RVFNIMREK
SAMLPFATEK
RTYQASSAAFR
TNMKWIEAK
QGPLVENARAL
MMIHSKSLNGK
HDLFFKAVSL
SGIDLLRTYL
RGFGIGSEILK
YNKVFLAK
ATLDVSKLTPL
NGPLLVNPEAL
HALPPGFVLK
ASYEKNLPK
AGGPSFTSKGL
RSANQMGVSAK
KSPVLPSGHHL
APPAASSPALPRL
FQMNVGPPK
RSLPHFEKH
RTLFKFMKK
YGMKFLSENL
SSFLIKRNK
VTPMMGELYGL
SAPHMHAYAL
AGPKLGVALGPSL
ASYDGTFLWK
QPFFQKRSEL
VGFDYKGEVEK
HGYENPTYK
RSLEESPGGSRK
SGPELRRSLFSL
RIMKIDIEKF
YNALLKVYL
HAGSPSFPK
VNPHLLKDLTERGL
QAIKGMHIR
AAIVERASGYK
TGPELISDTYLAL
KSFYWARKK
KALETLVKGVK
RALGVRDLSYR
SNPDLGVYEM
KTIQVPQQK
KSFNLKAGVSK
SGPVLGGPHNL
NTATWGNLTGL
SALELPSVHFL
NSLHIPKALQK
ASALTKLLTK
DGASSLESKLK
SSFLNSFVFK
RAYVNWRSK
FSFAPITKL
AGIDGEKEHAHAK
FDPELRIM
YTMKLKNYL
RIMENVFQH
KGLDYLHSEK
EAPGLRDHESL
TNLHLNTKEL
KNLSASQKALK
ATPELSTAKSTL
RQFETKENK
KGYFAVTEK
AAIASSLIRQK
AALASSLIRQK
VNFLLTAK
STLDFKSFGL
FGPWIQKYL
KIMGSEGSTVHK
TGPVFPAVPPTL
QGYPHDPPK
YTVDLKTYI
FGPVYEGKDLI
KSIMTIVGH
QGILGKSMPK
HNPNPKIPAL
YSVNVDYSK
KNYGPQITVK
KGLDIESTSK
AAIATIKTK
HIRGPPYAHK
SLREHFEKW
KAFEDEMKKL
AQLDMLLEKL
RIAGQVAAANKKH
AAFDGGFTVK
PPWGGPQH
AAPGIAVHAL
MGLAIHQVL
KSMSFPTGK
SPAFGSLAGGSIL
KSMILTEVGK
KSVGLMNVDGL
KNPALKAQSGL
ESFKMVNRL
RVLESLDRPNSK
VGPDFSASVIQM
HSPFFKVL
EGPSYAKKVAL
YGPGVAKTGL
KAYDKAVASFK
LSMDTKMILK
RSFENNLNTYK
ATLSLAEIQKL
TTILLQVAAL
RAIVWLQNR
FNPYFPGQAI
FSFIWATR
RALLKWTEY
HSLPFSLTK
YTKAWEEYY
LNTEFQTPLAL
MGFFQLLMK
RGPQMPLIFL
MAFSQKNPK
RALHWYAKY
GALKAQTWK
FIVRHQLLKK
MTPEFKKLYL
RSFEMNRTR
SAIEMMDPKM
FSIENGLLTPTLK
YTFDWTMLK
KTLIEVMPK
TVTEIGKDVIGL
MSQFPNAEK
RSIKIPVKKF
KSLEETIIQK
STFDMDKLKSTL
GSFENTPEK
MALKADLTSK
SQPLLVANAM
LSLYSVPEHQSK
RSFPNEMGKL
SAIDLEEMASGL
SSKTWLTGK
STLKWEKEEAL
FKPSFDVKDAL
RQILLGPNTGL
QNIQMLLEKL
RAFYGLKQVEK
ISMALGHLHQK
MNRSTNEWK
NTVKMWVQL
KALDFLWEK
RNFDDATMK
KSMNANTITK
GSMEVFQLKL
RVFPWFSVK
RALEIYATRL
LSPALRWVTGL
HSLSPGPSK
KSFHNWPDY
KAFGQSSDLLK
RTLLQQDVKK
TSFTSVRSGY
HSPEIQHGSL
RSLNEYKALK
MAPTLLPELHL
GAYREHPYGRY
SGFPGLPNVLK
LGPMFSGKST
SAADFFSHY
YAMEDVATRR
LGPILGQRGVSI
SSLVLGHRSIR
KSLLIQELSK
ISMPDIDLNLK
RALQAWPLIEK
WTPTLQHYL
NSPGFLGATTNL
KGPKFKMPEI
FEENVLPPKK
RTIELDGKTIK
KNFAMSYVKL
TSLDKFYRK
KSILYDERSVHK
QSMDISLTKL
SGLIALLSTGSK
FSIRSFVSKM
SGPELRPLL
STKKFWIQK
PTPAFHSSRTSL
TGPELISDTYL
KALTEELSALK
HSPGLHPYT
NGPILDKVVT
HGPLITFHL
HGPLLTFHL
EGPKYKSKVSL
KALDTKIGRYK
KLGEFFQTK
LSIKDLITTQK
HNPELTPTKML
MSLKDWFAK
TNPFFAKTL
RQLESYPPPLK
SSLDLGRSDGL
KSFEMTVEK
FGPEVDHQL
AIFTISIEQRK
GPGTSFEFALK
AQFHFTGIK
HSDVFSEPR
RNKDVLAWVKK
QAFEADIAAGK
LSIEVNPTRPL
FTSLLMERL
SSINYGETPK
KNPSIGESSIEGL
ASIAAAVAPK
RNLLLKSYF
VTPSLLHQDLAAL
TSFIPRFK
RKSDVFRDFL
RSPAMGTLGGDFL
KTPYLYSHSI
KAFEDEMKK
KSIEVIEKRM
RAIGYYSATSK
NSPDWGGVITL
RAFVPQLRSGK
ADIELSRNEAL
ADIEISRNEAL
INPAFADAHSNL
SNGSTIKVFKK
RSISESSRSGK
AAPDFPKNDSL
KSYSFIARM
SAFGAPLTKL
RTMNTEKLLK
HSGPGIGPRSGL
STPEFATRSM
SNPSVGSNIPSL
NNSLLGGKAGAL
QGPYFHINQTL
TNRENYIHR
SGPALTGLRNL
AAYAARWVAK
QGIEDKITKM
ATFLLINH
TSPNFVVTQAL
ASLQIPHGATVK
MIYASSKDAIK
YGLAWEKY
SAIDRPVVYK
KAPIYFSTGL
AIYKTPPGIQK
SSPHLINKL
QGPHFARPSL
ATISNDGATILK
LNPTFTFPSHSL
KSLGHGLINKK
SNPTMLRTHSL
GSSPEFNSQFGL
VGPTLKATF
AQIAIDIKSAK
RALAEQKATEK
HSIKGMNMPK
RSIGTGGIQDLK
LAPHLPQITTL
SGMYGTLPR
LGPPPPSFHL
RGPRLSLRFL
RAIKLWAKR
FGPEYEITQSL
ISHYAMMKK
TGVDFTGTTVGL
KSGSALDGVSRK
YDPNFMAMSL
SAFGALLGGAK
YALVINGHSL
LSPELALPTGSRAL
KSHDVQEVLK
AAPELKVRL
TSLQSLIDMAK
KAKKDDQMLK
RGFGGKYGVEK
VSMFVEVHKAIK
EGPEVKVEGL
KAVSKLWGK
GPELHHKL
HSSPSFNLDTL
KSIEKEENMGK
ITPWLEKTGAEL
RAVEMDKKYIK
RVLTAVEMGMK
RGYWGNKIGK
RSLEQFKAIYK
ITMADSDLLAL
AGAVIWRKK
SSPYFRDHSAL
YALTSSTKIIK
TVAAGTMTGMLYK
AGPAWAKAL
RQIEIPKVAK
RSLLPPKKIIGK
GTMEWIMIK
KSINNAEKRGK
ASIELRVTSL
FGLYFHQHL
VSKLWGKQK
AAPSFSPAAGQL
NGLSFIETSAL
SALDMSRSWR
SGPDLQRRTHL
QALGLYVNKM
GGFLLGVRSVNGL
HSFDVKKLSEK
KSLEIEEKINK
RVLEKHFGY
RSKVELTRY
FGQESGPSAEK
SVDYNFPKK
QTLSPQMWK
YAPHVDHIVL
LSPWIEETRAL
ISYSNTGDGAPK
RNIEFALKSL
RSPVFNHSL
HTFIITGK
RSFDQADRAK
QGIKMVVPGL
TGPQWDSSSL
ASLDSPGRMK
RALEHLHSKL
LSLDDLYQFPK
VSPSSFENVKEK
AIYEPKTFK
SSFTGPVPR
VVMRDPASK
GSPLFGVHL
MSPDLRPHAGL
YGPELHVAL
NNPFLPQTSRL
HAILNILEK
YTVEITQQPGL
VGPAPTSKSYL
VNFLLTAKL
ISMPEVDLNLK
FSLPTPVLR
PKFEVVEKPQS
TSPTFRRPKTL
SIFKQPVTK
KAFMNNKFGIK
DLPASYKFHKK
FNFALVGHL
LSMADVGHYR
MSPQLQAPFL
RILKSPQVVK
KGFHIVGY
KVYYPVRHH
TTTTLERTEGL
KGFPFWPAK
KNIDLTAIISDL
IGDSSLHIILK
SSIQGQWPK
NGPEFEARI
TAKQNPLTEK
RIFNELKTK
KNFQIEVQK
SQPDLLHQLVTL
SQPDLLHQLVTI
RAYFETEKK
SVLIQKQIFK
KGLENWLHK
SQLSFDRILK
SNKEGTRWFGK
KVINAENAAHK
VAPELLRIYSL
SSLKTGLEKM
SVYVLVRQK
VAPDIFAENM
LGIQLDFEKNQL
SSLPALLFK
KALDLGTFTGY
ISYPLHHPK
IAIADVDLEDK
VGVGWRVDYTL
GVIVHIIEK
SLTSTSALEVAQK
SSPAWSEVSSL
RSSEMLVKKL
YSFIARMK
RGLAFSSRSKGL
VIYTSHLQLK
RNLPFDFTWK
NTMRLGSIFGL
YKRELKPNEEVTWK
QSIDMKLFPK
SVQEYFVRK
ATYHPWIIR
VIINFPDPAQK
SGMPDFLEKL
VTIRHFENR
SGPTLHGQLL
KILHPLAPKM
KALRPDMGY
FGPSVIRGLL
TGPTWQQSLEL
RILEARPLSDK
RSISLTRPGSSSL
SSPFFREAL
IGPSINKAKSL
ASMDPKRFYKK
FSINVRDFEGK
RAVHNPMIQK
VSLGFATFYK
TAYAQEIQK
FSFEDNAIRGGK
SSPELMGVGSL
AALDGTFQRK
TGIQLNPNNHL
YTIKKPVGK
YDGFPELRAEL
KSLDQAINDKK
RIQEPAPTSGEK
RVLPQMGRLK
ATMAQWKKK
SAFTQDSRALK
GNISLRHYL
SQLRLHLRQK
ASMPRLPEH
RSYESVEGTIK
SSYDTAWKK
FNDKKFVIK
GQPAFLQSREL
SSPALPSGSPHL
LSIFSQEYQKHIK
GQLSFKGKSL
SNNELVRTK
ASIAAPFTSKL
SSPDLRFSM
IGSSPFFERSGL
KGYPHWPAR
VTILMRAVNSL
GSGVRIASAEGL
YGPVVKVVF
AAMAEPNAK
TVITVDTKAAGK
ASLLLHNKF
MFLSFPTTK
AALDWVTKK
YGLLSDFVEK
TSLESFFQK
RAILWLENY
RTFEGSQVESVK
RALELEQERK
LEQPRIVKWDRDL
YNPQFITK
RVYEANLEKM
ISFHLPVNSRK
QTFLLQTTKL
VQPLLVSVSAL
LQPHFIKADSL
AGPGFINIHL
QAITTFGSLK
TQLNMFQTLK
RQPSIELPSM
KSYDQVHSGK
RAMIENFNAK
SNPLFRTSASI
NGVEIHVDSV
NNAEHIAYL
SNPEVRRAVL
YGLPVVVK
IGVDFTVRAL
RNPYFRNKL
SSPRLGYETYL
SSISPEEKMMK
NSLIGIVPK
ENPRLIASSL
SVLWPWINR
RGPGFSSHSGL
SALLRPFWK
VGPELSRRIYL
GQPEIKKANSM
SRGEHRQDRRERPY
YDPAFKYHL
TGGTFVVKGL
KSFFKDLPK
RVLDPSKFLK
KALDDIIYR
FGVGLYEGTGL
KVVDSLYNK
ASLMPLQK
SDPELMQHL
IIEPSLRQLAQK
RAIDRADYY
AGTPMFVVK
ATLDHFYER
KGPLPGPAAGL
SSLPVGINR
SGPGIGPRSGL
SNLPMSETKF
QQLYWSHPR
YGPQIDSHDF
DSPYIRALGF
RSVSFSHDGL
TTPTYGDLNHL
RIIHDYKDILK
HNPSLLGNQTL
SSPYFKVQL
IAMQYLELTK
HQTEMIITK
SGGPFRFK
RVLPPNWKY
RSIPQSATWK
RAIEIYTDMGR
YSFKVITKL
GTGKSGAYLIPLL
SGPELGQLTFL
RNSEVVAIKK
KAYGELPEH
VNTEWGAFGDDGAL
ASIFWLKKR
SAFQAPAVK
KGLPAEVYK
TQMPDPKTFK
IIYQIRSQGSK
PSPVLKNAISL
TALKDQLLAAK
FGPDFKLHI
AQYEPPQEEK
KSDGIPMYK
KSLLSAEEAAK
RSLPFFSAR
INRQLIYNY
STFNQVVLK
ADLGLWRGEEVTL
FMLELQHAL
DSPVYKTVL
HNLEIVIQR
SGPQLLPVR
NTVALTTPIAEL
ISFENVDTAKK
YTAEIKQNL
SSHKTFRIKRF
KGPKFKTPE
HQPAMKSFL
KIFNAALKEK
RSLKEEGVQR
SGISLRSTGSAASL
SNPILTAKESL
KSLGHGLINK
RLFAPWKRK
RTITVGVYEAAK
KSKEFDFPKL
SSLLMDLKYKK
RAFPNKQGY
LGPEHPLASL
NGIPVEEKSRK
VLLPKKTESHHK
SHLPMKLLRK
ASMGLSEGPAGSAR
QSPALGLRGL
KAIVTEPKTEK
KQLADIGYK
FPLSVQKF
TSPVFHSTSL
KGYTLPIDK
KGYTIPLDK
IQRPPKIQVYS
SSMDTTLILK
HAILTDATK
RILDLIKKGVAK
STIEFKNML
KNFEFNKQK
SGPKMKAKKQGF
KQLTLKTAL
ASYENVRAK
YNKDWIKEK
SSLFSKGEPK
VGPELHEKL
VGPELHDRL
FSDDPNVTK
SAVDPVQMK
TSIAIDTIINQK
ISKKWGFTK
YSHLFTIK
TAPNYRLKSL
NSPVVRAENL
RSLPVEEQPK
VSFPVGIYK
LSPDLSLGNATVL
KILHPLAPKMM
SAPAFDRHMVL
RAYAVGDVEKM
KSKEFDFPK
TSFPHESTY
AGPELPDPLGGL
RMFQDIGVSK
RTVEDVFLRK
VSFEIKNMSK
KAFSQKQYVIK
RSPDLRPWASL
RIQEHFNKK
RSMDTIVGMLY
LSFETTDESLR
SSMKSELESVK
RVAPEEHPVL
DSPFLKEVL
KILDVLGHIPK
RNYLSIFRK
QDIQLDPERSL
HVIETLIGK
ATLKAELLSLK
GGPALTLWHL
LSAEWLGVLK
VGPTLKATFT
SGLDLSGHAGMLTL
KTYLNPWKK
ASIRIPWTKL
RAAPPRWTV
AAISETKVKK
KMLEEMQIK
RIFPKEMLK
NGPEIMSKL
HNQSPRNMY
RQLSILFRKL
KGYPHWPARI
KAFSNSSNLTK
FSPFLRASTQSL
SSMEVKEDK
YSMPSTHAM
YAYVTERQK
STLALIHSAL
RSITAAKYREK
AALRDVRQQY
NGAVIHLAL
FSYGFDGRGL
KSFLSKGQVLK
SSLTMGQLYEK
YSYNIRHSY
QGPFVQVDEL
EALPLTTAEGAAK
RVFQTLRDK
IDPELNEIHVL
GTIPVPKGK
ASLSRPLNY
RQLENMEANVK
GSPLLDKELSL
AALPHVEQY
YNPHLLLNTL
LGPLFRNSQL
STMKLVTNL
AGPYFVSEDNM
TDPELGGAVQL
GAFLVLPLGK
AALETPGGPSQQK
FRDGDILGKYVD
SSPDLRFSMAL
RTFPYPGVGK
RAIESLVKKL
KSAPATGGVKK
TSVILMQHL
VTDVKFAPK
RSYVTTSTR
RSPHIETYL
KGIYPHEPK
KALETNTHVK
SSPTFLRAL
VSLPAFFER
AGPELQNKAVL
RTWNVGKIMK
RAYSSFGGGRGSR
RALDAYLSTR
KAEEILEKGLK
LSYVENIKSAAK
AILQTDQTLSEK
RGYFKGYPR
QSLEHSWIK
RAISWTMK
KSIMPGTRKM
KTPWLVGDEL
KALENIKEGVLK
AIIQIQIKDSAK
IKGVTLGFRYK
QQPVFDALRDEL
ASLGLKFNK
ASHISKLPK
ANPAFTYLTAL
LSSYEIITPWK
YIKDDFRFK
FSAEMEKNK
RIYEYVESR
RQLPPNGDPNFK
STIKLFLPDGM
SGVGLRLTTSL
QGPGMVVGDEL
KNPKLLNQL
LAVEIPDLIQK
AALVMTHLILK
KVLELKEHKL
MALPLTALR
RSMQGFPFY
GNPLLHAQL
KTDLFYERK
TGVQFTTKVRL
KGPSFKASSL
AGIWGFVNK
QTYVGITEK
AAIEAAAKKL
NNPRWMTRL
YTNKEMLKYK
SNVNLVNAML
KTIDMELVK
TGFSFNTK
SAMTGLIKR
ATDKSFVEK
[truncated: 5,755 more rows]

## Sheet: 104003_A14
DPEKAAQMRSQVM
GREEYEGPNKKPRF
GFYDKDSSGWSSSK
RVFDHKQGTYGGY
SKYDSNVSGHSSF
DEESDSKAPPHEL
THRSGQGAFGNM
GKYSQVLANGLDNK
NQEFYQDTYGQQWK
FEGFPDKQPRKK
MKFNPFVTSDRS
MGPGTSLRHLFL
SKFNIPDLKVGTL
SPNSQSSKMNSIVY
RGYPLEDATHIAL
YELAVASFPKKQD
GPEDTAQLAHAVL
YKANSNLVLQADR
GMVESSRHNW
MKFNPFVTSDRSKN
SDYNIQKESTLHL
VDPEKAAQMRSQVM
VMQRLLIGW
AHYDLRHTFSGV
SAHWPIFKW
GMSSEMAMKKY
RKMEIYRPH
YSQDAYDGRDYIAL
SKIETEMKNKM
YKFYSVNVDYSK
SDQGSDVSLTVPKV
FDEEGSKIVKDLM
RMFAPTKTWR
RKWAPPKFLPH
RGDYDLNAVRL
SAQGSDVSLTVPKV
MKFNPFVTSDR
AKKLPNWQM
DEEGSKIVKDLM
KLFQQIMHY
RKRPVPKGATY
GVFNHVHFGQW
GKREQAEEERYFR
GVIDSQIHQW
KGPKVDIKAPEIHL
SKASFLPAKKTA
RMFGGPGTASRPSS
PEKGPVPTFQPFQR
RKYDEVLHM
SRNGMILKPH
AKYDLEARQAM
KLFESWLHQW
YKRELKPNEEVTWK
GLDPTGAWHAW
YMKVYKEEW
GMDPKAKQHMW
KLGLGILNNAFRL
TYSLGSALRPTTS
AHYDLRHTFSGVA
GKKLPMGM
HGIDLDHNRFLIL
GKYVLGYKQTL
KVFPTGPSDW
AAIDEASKKLNAQ
SAMYSRKALY
RLAFPVEVVRL
RMHQAIARW
SHFYPHVRL
SVFTEPNRHFY
AHYDLRHTFSGVAS
GKLNYKPPPQK
SKYDPQKEAELR
KMFNALIHRY
YQDTYGQQWK
SKYMPSVKVAVF
YKLKKGMVF
GGYDGYRPSF
SKMFHPNVY
KLMPPLIQKW
RLFEGIIKGKY
SHMMSAIKKY
SQHYHQGYY
RMFGGPGTASRPS
RKHQEIRAM
SKYAPSYYHVM
GIYKVVRYW
SKWNTRESYDDVSS
KLYSDIPHSW
KWVEMTSHW
AIGDPAKKPPATF
MPYSHPSSY
RQSTILKRW
AHYDLRHTF
KVWDKSESGEW
KGGTQYDQNHLIL
RFLNMLRSW
AMYSRKALY
YFFKGLHYW
SSFIDPKKQPAT
GVYDKTARYW
RGWQGLDEVVRL
RGPDELHYTYL
IPNASQAESKVF
RGFNPEVEKLML
GHFEEGKAM
SMDKTVRLW
MGPGSFVALRL
GKKMRAISW
AQISKRKM
SKMDSKGYGMYDD
AFLASKMEPVVY
FAKIPLAW
RLFTAVVRW
KNVHPAEVRLLIL
AKLGTDPTHVM
SKWDGHEEL
YKKKKMEVF
GFHKPKMY
RGPEDDPAALFEM
AFWQRYPNPY
RQYEGPLHHY
KYPPFAKKW
KLHVDPENFRL
KLHVDPENFRI
YPAALPNHKP
KGPKISMPDVDLNL
NMFKMAKNW
HMVVEVPRW
SKFIIHNVY
RQRPRESYQMGHM
YVTTSTRTYSLGSA
RMYPLKPTWW
GKLEQKLKWAF
KSYYTVHLLQL
TKFKITTSM
AANPKVLKW
AMYWGTSRW
AMWKKLAEW
GFYDKDSSGW
YVYEGRGWHW
GKMALNHPYF
SMRETDNPRL
TMYQDKHEW
SFDVTGVVRQW
SVFGMQARY
KMYDAAKLLY
RGPPGGGDAAPPRL
YKFDYKAHQR
KLFSQNSGGHW
RVLNVFRHW
RMYDERAQEW
RKHNQRPTF
RKYELGRPAA
HGPLVEERSVVL
YLSDEGHYW
NWNIPVHKW
GMHTVSVKY
FKFSVTHHY
AAFEQLQKW
KIEVLPSHLFL
SKYGEGHQAW
KFQTHLLQW
KYFIHYSGW
GLSDELAKQLW
RQWEKPSRY
SKMDPPDLPH
GHYGIHEEM
MGPGTSLRHLF
SLREHFEKW
RGPATIPDNLHL
RIAGQVAAANKKH
RLDLVHTAALML
LSSFIDPKKQPAT
AAFAAVLHW
RQKEKSHMM
FLRERLLGW
GKLNYKPPPQ
SKYDPQKEAEL
TLYTSSPGGVYATR
DWVPYINGKFKKDD
RMFAPTKTW
HVFKLVALY
GGYDRYSGGNY
IQRPPKIQVY
TFMDHVLRY
GQYMGQLKM
SVKEESSHSW
RKFMTNRLLQRK
AAPFFIVRHQLLKK
YKKGKDSLYAQGKR
AFYDGSAGRW
KYFDEHYEY
YRGGYEDPYYGYDD
ASMLIKALW
AKFSATPRYM
LGPALQAAFKL
VGPPGMVAHL
FAWRHFYW
GLHPLTLRW
RKADTGKMYAM
HMYEGYPFW
YWHGLHPGY
KFQPYKPFY
TFFARIPYY
SKIKSFVKVY
RMHKGWKKW
LPKKGGAGGKGVW
RVHPETYEW
VFKEKNHSW
HVIEDIKGKW
SHHSMVSM
SKEEAMRWF
KLLDYLNHDW
GMYEQLKGEW
KGLLSAEVARLLL
RKRDKVLFY
GMKEVTRTW
SKHRWPTGDNIHA
SVSGSQRTSNIY
KWNLTVHYY
HGIDLDHNRFL
SKDMESHVF
HLMDVVYTW
DPAQITMKVI
SQMVIRPH
SHAMKITY
MLHIWGKYTRS
YIMNGIIKW
YLWNNIKKW
RKKPPMNSM
GKFEVKWIF
KAPSFERGVYEL
AQHIVTIVH
FVFKMVNNY
RVVPGLPSGW
YVYEYPTRY
RKLQKTYRM
KLELDGESHILEL
TKHSPKKPVIVF
KSFEDIHHY
FPSPPKQVDM
SKYMPSVKVSVF
YFKHPISRW
GHFPSPIRL
GKKESLGTREVL
KVFPEDMAKY
YFKEALDRW
KFMEHIITY
SKKYKEFKF
YLMDPSGNAHKW
RIIAKLAAW
TAKALQAHW
HGPAMQHFL
LPHHVHLTW
RQLIMHAM
IALYMASQPRNK
AKFFAPKMV
KVFMSITKY
GRMRHLKIVY
QQREKTRWL
KLPAVVTADLRL
AKQMPQPTF
GVNDIKNHKW
SGMVRAKF
MMYQEPARW
GQKPWSQHY
AAFDQWREW
AKKDSFFSNISRSR
AKYPHVEDY
TLNEDMRSW
SKFSIKDARKSF
KLYTKVINW
GHRMPGPTM
THFTHSQF
YIFRPEMY
TKRPPALMY
SKFHMLLRY
SKFEFETNM
SQSSKMNSIVY
SQFFQVKIF
YLPAIRALW
KGPNGYGFHL
GGPGKGMFTRLYL
GKMFNALIH
GKLEDRKPLM
FMLHIWGKY
FPAKVTAHW
REFEGEIHW
GKFFRSNYY
FPPLTQRTYM
HKHEMTLKF
RQYDKFLTH
LPPPPIKHNM
YQEFWGKPKP
AVFQAKKSFYW
YPPPVDPKKLI
KVFDGIPPPY
KSFYPEEVSSMVL
RMRAILVDW
FQAEVNRMM
NAYHPMEW
SIYPKLKFW
GQAPVVPYM
EKWKPMTF
APPQIPDTRREL
EVFHPTHEW
RQWDQNERF
SKLDFLRPY
GKFFSQKSY
KVKKTIPSW
RMALEIGALHL
GKYRMPFAW
GMFNRMAKW
HVYESIVRW
RLPTIDPNTRTLLL
WSFDGIDRW
RTLAWVSRW
YFLGIAGGKW
SKFDSERSISFI
WVKQEGPEY
VVDPFSKKDW
GFHTQISKY
KWTNYIHGW
KGAAKDAAHML
MPFPAHLTY
RQHEEPESF
AHFGIHEEM
SKYEPKSYVM
SILDLAHKW
GPGTSLRHLFL
GHRPPMPSF
FVFTPSQHW
MTLKDIYSW
KAFYPEEISSMVL
YPGWPLRNLL
VVSEEKSLMFI
KGPKFKMPDLHL
HQRPITSMW
AKFHPNLVV
THHMKVLM
SQHQSSYGPM
QPRIVKWDRDL
RVFQKYSKY
AMFNIRNIGK
RWLVPGLW
FPHVIKVYW
TDELALVDVLEDK
YKLGVRLYY
GHFDKKIRF
DGEGSQASKIIS
AMETALAHLESL
RSYQPHGRW
KVFEPKLNY
EKYGDKMLRM
VVFPNGKLHTF
RHRLITQVF
KILEYLDKW
FANAHLLGW
RLFPYGQYYRW
KKRGFGFVY
NPPVLSHEFVL
YQFKRLKY
KAFDLIEHY
MVLDIVQHW
KLYVVKQEW
VVWKAVGW
AKPEYISKTY
KLHDAFFKW
KMFHPNVY
AKFGVFVHW
WTQEHVRQW
KLQDLVIPW
YFFKGLHY
SPFHPVTHW
RVHAFLEQW
YKIKYPENFFL
WFNTKISAW
KVWMAPSSW
GWSHIHNTW
KIYLPYLHEW
YKLDKQHTF
SKMDFILSH
KGPPGLHSTSLDL
GKHVPRAVF
HGPFLIQPDGVTL
SQAGLFRVW
YLNKAFHIW
SKFSKYSEM
QMRMATPM
RMHGIDPVVLVL
WVPYINGKFKKDD
SKKDFFKKF
KFFQLAAQW
MFNIRNIGK
TKFLQEQRM
GGPSSAEERHLLL
VKYERQPEY
SKKWSKKFF
GVWDPEKW
FKYNKPVFF
KTQSHVSQW
TKKEHPPAM
KMFSSEKIM
NSQSSKMNSIVY
HFHLPYRW
AKMFAHLLY
GMKDRLEFW
GQVWKMRF
AKFVSWKSRTK
RGPFADENFKL
KLYQEMFAW
GKWKDLHKM
YGVLRFIM
NPPIPRNQM
FMVPAQSSW
YLRLPGPHW
SKFDSERSISF
KIMDVVFRW
ALLTHQSSW
YASKIVGKW
FKKHPEPFF
AHFRGQIYW
RMKFYNLRW
YMSHIIEKW
WPFLIDKRW
FQIGKMRY
RIILDEAALHL
GVIWKTVGW
YGIDKETTIHLTL
SLYKRYPSLW
HVKDPQSGEW
KIMSVIREW
SQRDLDHRF
LEQPRIVKWDRDL
RPMYPILKY
DAPELIHDFL
EVFHETGKW
KVLLSYHGW
RGTTSYADQMFLL
KSVDDIHFLVL
NEDGSMIIAHAF
YQMQHLQY
GYFGKVGMR
RMFKNGSFW
KLFEVPDTW
SQFHGLITH
HKFHHTIGGS
KLFDIRPIW
ALWKFIQQW
AHYDLRHTFSG
KFFRVLNGY
GQFWGQKPW
SKYENEKAM
KGPKISMPDVDL
YLWHIPVTY
TAYEKIKKW
GKFSKSRGVGVF
SKWSAHVM
PSGNAHKW
RQWENPRAL
RILNKLTKW
RLLNKLTKW
KGYTDIVKMLL
GKSTIVKQM
KIYEISNRW
GFYDKDSSGWSS
GKFMKSQGL
YLRDFLRHW
KGPPGLHSTSL
YKRDPSKQYGL
SHFNIRVM
VHPPKVAVF
GKYVGSRPIKL
TKFHLQNTL
SPEGSAQFAAQIF
MQAVRLPLM
AKWELEDRF
WVHSDFSKW
AKKLPIQEF
GKYSGGHLAA
RFIVKIQSW
SVKSIAKLW
KGILGAGYQALRL
RMVEIGSRW
IVRKDRHLW
VFRDLVIKY
AKKYMKSTY
AKAVDIPHM
YQFLHHTL
AQFDVVKHM
RKFDDIRIY
SKFTSILQH
PAKKPPATF
VPYDVVHRW
GQLLFDRPM
SKIKMPKFTF
SSFDNIRAW
SVFEKYFQF
SLRSHFEQW
KLHSDMSTW
AKFHEVFKTL
TQRQKSHTF
AKKYIDQKF
RKYSAAKSKVEKK
GVYDKTARY
MKYPKVKKY
AKIMKVINF
GKIYPYLVM
RIFKVSIKW
SALGVKWTW
YPFKDVNNW
SMHPLYQSW
GKWDHVRQL
KMFFTTKHRW
MPLMSAHW
RWLEGIRKW
TPPVLVHNQL
SQFEKFVRF
GKYAFKPKY
ALRERLHRW
GARQVFERW
SKFIKFQEM
KWIERVVGW
WLHTGDIGRW
KTFPYQHRY
TKFGPRPAVM
MKYEKSYRF
TGKSGAYLIPLL
VWKKRTLTW
SQNPRVAAW
KLLPRPEMW
LVVYPWTQRF
SQGPVKHVY
KVSDLTHLY
RWFDDRSGRW
GVAQAPHSW
KAPALPGSSTGLQL
SKKLEMHVY
SQFPNAEKM
VFRDPSSWRW
RLFEKMQAY
KGPKVKGDVDVSL
AQRFFAQKF
RVFVHYTGW
SMRAILVDW
GKPLFKVSTF
WAYAGIHEW
VVRQASLHVW
MMYEKPERW
RGPGVLKVLWL
TKYMREPTF
GGWLPRPW
SKLQNEKWM
SKVGYQVRF
GQYRMPFAW
GKFMPIMQW
RVNEYRFAW
SQFKFLQRL
RMFGGPGTA
KWFTDGAKLLF
AKYDEIKKVVK
KAAAVEKQVLQL
SMKEVDEQML
SLRSLYLRW
MPMNAKYW
KGFEDEVKKLLL
GVVKKVAQY
LGPKSMMKMLL
QQHSAQAMF
VVFEGNHYF
KFFYQKEHW
RLSEEMTQRRW
SQNGLHAVW
RLKVALEPQLWEL
KFFEKLPDGTW
RKFTQLREY
AQNVRPAM
IHLRAEDALFF
MSNADFAKLLL
KVFKEKNHSW
RLLEGMRKW
KYIPKVRKW
KIGEVDVELHTL
KIWHHTFY
GKFFARMTL
PSSKRQVDPEF
SKNDSNFKF
AQAAKFPAH
RAFPHAEW
AQAMETALAHLESL
YMIERTVSW
KMLDKYSHY
SWDRTVHLW
RHFWGLRVR
VPPIPVHKDF
TVMKDVPGW
KMAIPVLW
KLSELLRYY
SSHLKTTF
SMAGVVKSM
SMNSIKTFW
DDSPPSKRDIDKSM
YYFDSYAHF
FKIDMPHRF
SQTVKKVIEINP
SLKELIMKW
AQFLHFHF
KMFIGGLSW
RKFDRQGRGQIAF
GKHQKIVSY
KMLVHFERW
RLMELHFKY
SKNDPPMEA
KFSSEKRFAYW
PRGPPPPAL
AKPKAPPPSL
QMREMEENF
FQIRQMEM
MGPRLLPPRLLL
RGGQAGPRGLAL
RQYPGKGPEF
VIHEQVNHRW
APLKPALW
RQHANAVF
YKFTPKYVL
FIKKLEHSW
SKNLKEPMW
YAVRPLLW
KFNFKTSLW
RVRELYRAW
GKFHNIVRL
VGPNNVHVALSL
GLNWLAHSW
GKFFSRVSY
RLDLNRKEVLTLRL
VMYPAYAKW
GKDNKHPMY
GKLAKPRQL
SKHAKISTL
AKWFPEVRH
RKYNWSAKAK
HLMLNIIRW
SSARHMVM
YVFNPIFGKW
KGDTSGDYKKALLL
SHFYPSHGL
KGVDAETMHTL
SHFPALLTH
TLKEVNMRW
KKPNVDADDVRL
WMRSHQSAY
SQAPPPPMT
GGYDRSSGGSY
RQREMEEQM
RQLQHQQF
KALFKPGAW
WLFAPHYRY
DLFDQVHRW
KFLARYPNY
HGPLVEERSVVLL
RVRLEQAHW
RLRDLHQSW
YLFHEHQLY
KLKSLMVEW
FAKKHNKKGLK
KFMPIMQW
RGPGPGPTILKL
HLMSKIKEY
KGPTVKGDVDISL
SAMYSRKAL
AQNAVRLHY
RFFDEIHTY
RIFKPWKW
VVLVDQHHW
HKFDLMYAK
KLDIAAVRALNL
SQFMGPPVA
MKRGYERIY
AFFAERLYY
FQYDSTHGKF
KVVPPKEW
RLWISVARY
KNFPLKTKDELLL
VQKDIQPYM
SQEPAHPAM
KLSDLLKYY
RLYNQTSQW
AKAGHPPAL
KVIVKNMGW
GQRIKVFGW
YKSADHPTL
AKYYTRITM
SKMKAHTM
RKFFLSHPAY
KVGIVGKYGTR
KLFDKLLEYM
AAYEDSRKW
KGEHRQERRDRPY
RLANTAPAW
YKYDPPFGF
RFLKLLRFY
SVFKKFNW
AKFDPDHYL
KVLVQALQW
AKRDAEAHPWL
SMWEQAKAL
AEFFHHVL
KYLPEWSAW
WKRIPVVVY
RKREDDKLFL
KVKFTQQNY
SQMNDQRVL
HFWGPVANW
SKAEEQFKF
GKLQKHQAF
SKYSTIPKF
RMFDMGFEY
GQYGNPLNKY
KMMQKTTLY
KVFDAIMNF
YPLERMGFW
SFSEYIYKW
YKTQYRAMF
SQRYESLKGVD
KLGDKVAFYW
RLNDRIEMW
SLKDALFKW
FMKSVKLEW
AMREMNGKY
KGPKVDLPSVNL
KLPEPSSLQYL
VDLASRLVNKVF
NLIKHVQGW
RGPGPGPTILKLFL
SHFEKQLGY
GQHMKVDY
SKMKSVQW
MPHSTSRW
TPPLLPKPSL
SHYSEMLAF
GLMDEFSKW
GFFFSHVGW
KGFEMSSTRDLLI
RAASTARHLYL
KVYTHNLYY
HAFHGALHLW
ALLGQALKW
SFLHNKAEW
AKFSATPRYMTY
AKVVPPKEW
KGFSDKLDFL
KFRWHNSQW
KKMEFGIVY
GKYEAVERY
SHDKRFVM
KVLTLIQSW
FIHHREQVW
RVSPVERFW
VWLRAQLGW
KMKKPEAVRW
STFDAVLKW
ALMEQRLFW
FLREHLNYW
KMKEALRFW
KTFMPIAW
SLDETQHIW
RMLKTHAW
YMYRHKGTY
VMYKQLSAW
SMADVKFSF
YKVENKPAL
SQWELALKF
KGPSLDVEGPDAKL
KWWDRQGDW
AMYKKLSRW
SKASRPPQF
SKHKMIAM
HQFEKIEQF
SQQTKMPLW
KQFAYQNSW
YFSKFPGVW
MPPLIQKW
GGRMFAPTKTW
QQVQRLPFL
WIYNMETGRW
YMRRMVATW
FIGQSAVEKLIL
KVHYPVAW
AVKQWEQRW
YKFERPQY
RKRHPDIHF
KLFPMKALGYF
YFLKPSYW
NKELDPVQKL
AFYEERLTW
SLLKNLGHW
AKSNYKMMF
VLKKYPHLW
KQFGPLVRW
YMRALQIVY
KGSTAARTFYL
KSFDNIKNW
GKLMAKAIM
QAMKHIVM
KNFDKLSFLYL
YKFDFPVSY
RTYEHEAMW
GSRPTDAHF
RLFPGWKAWV
HVADKPSTW
TKYDAAHFL
FQRGKNLRY
KGFGSDKEAILEL
AFYKGVAPLW
KMEGFPKDVVIL
RGPPPPPRM
AKIIPPKEW
SQAESKVFY
GKFDNALFH
RGPSTPGGKLIL
VTYKNVPNW
KGLGAEIAKNLIL
LANVSTVLTSKY
KSFDNIRNW
AKHKGPPVF
KLYDMVLQF
KMISYVENY
HLNPEVKKSSW
IQKEATWTM
KFVDILTNW
YVFDKRLRY
KVFYPNSY
AQHSAIKML
KMHLPVNRW
EHFDRILEM
MPFNKEPKW
GMKYIQHTY
KLHRKIHLW
AKVSHRVF
VQLYGSQVAGEAL
KGPFIQGKMLL
NKFFKERVM
KLKSFTYEY
ALWDGESRW
VGQFIARAV
RMAGPPPAY
AKIPNIFSM
KGPLPAGTILKL
SKWEDAVRL
SKMKPLWVM
AKIESHQEAF
FAVEAHQW
KPWFDFRKW
DYESSAKLLGMSF
KMVEALRIW
SHFEPERPY
FKRDPVWKY
GMLKIRIGW
GKMALNHPY
KAFNDPSSLRL
RVMGPRTLFVL
KTHPYNPLW
AKMKKMEM
AFQRHFAEW
RGAFNSKQLLYL
AKYLMELTM
AMIVNKASW
AVSPKHSYW
RLFAMNKW
TLREVQERW
KVFSVDKW
GQHKHPRTW
KFNPVSFTW
FSAEQIARW
KLHELNQKW
TVRPLLQRW
KSFEDIHQY
ILHIPDAHLW
RLLLVHGRW
FPASPPKGYF
AHRQMDPAM
KWKDDVRLW
SQRALYIRY
GKMDKMRLL
IKYEFPQKM
SMVSTIMKF
KFKDLPQMW
SHFSHLAW
KVINTGIKVW
KLFESIQKGKY
VVNNSVHSW
SKASHHVY
KLKIEPSGW
GHWDGSMSL
MSFTPHNW
ALFHILKW
SLRDTDRQWL
EFNPRIGKW
SQRRSPPTM
WWTNTAHY
SAYQNIAHY
SFDSTVRLW
RGPVGSKRDHLLM
SLDAHIRLW
AKFGKGAKKTSH
AAELRHVM
SHFDSPFEF
VVRELMLRY
FQAKRYVF
AKMKPNIF
YLKDTLQKW
HLFDIITQY
SKFQMHVL
RKFVDKYSM
FLKQIREVW
GQMDAVRIM
GMFYRTIRM
KGISMSSSKLLL
TQMPDPKTF
KMVQAIKW
GLDSIIARRW
KNVHPAEVRL
SWYDHVKGW
KMLDESFQW
SQMLHPIF
FKKQNQPKF
MSLPLTARW
VSVDSQFTHLAW
AKMFSKAF
QAFPNTNRW
SLRDTDRQW
AKVEQILRM
AKYPIKQSL
SFLDKMSFY
KAPGEQTVPALNL
GFRLNEHLY
RMKIPSNMW
GQYEQVKQL
KLYGDFLSW
SMKFKDPVK
YKRESGQQYF
SKKLAGPEL
GQFEQHFQH
VKMYKHLKY
VWRAAANHRY
AKSGTKAFM
SKLWIIMEY
VQRNHETAF
KGAAELEKMTL
YFSRPWQW
KVLEQHGEW
FQQDDAHIF
SLRNYYEQW
YWDRNTRIY
SHYQYHLRL
YKTEEKPIF
KGFNKSVENLFL
AKKLYTLFY
KMIDKKAMY
AKLPFTPLSY
AQMEKTMRW
SARDEVQHKW
TKFGDSQHSH
IKMPKISM
HLHELSLRW
VFDPVTKSW
RLFPMTPNW
VLFETVLKW
KGPGMDVNLGGLNL
AQVFKAKF
HGFSPLHW
HKRPGEPNM
YFYKGGLVW
QSVRPAMW
EQPRIVKWDRDL
KGGAVAGNVAHIL
GQFPSPHHH
KIQFNAHIW
AKMMLIVNM
GQFSKPFSF
GKRKMTPSY
YSYVPPHW
HLKIVYRRF
MFAPTKTW
KGAHSKNLFL
VVNIQTGHW
KVFPQSASW
FLFRYILDY
TMNIKSATW
SWFEHVRGW
KKKEPEPNF
KSFGLFSKW
AHMENQAVM
KLQQLTAMW
AFRALQHSY
SKMFFTTKH
RVDPNGSRYLL
SFKETTNKW
KTFTGHREW
KGPAREPQVYVL
SKHAHEMML
LQRIPDPTM
KLLEAQSHF
FPSEFLEEKM
TKVALFNRL
AVIAQLHYW
MPPNLQKVDL
SKMFAEIMM
KWNLKQQYY
HKLGWVLSM
YKPDLKEASRKSR
RVFDNQDAW
WAFMTTHSW
AFSDAIKKW
FKKYLQETY
TFFRVAFY
RQFQYLHVL
YLHQPALKW
KKRHTDVQF
KMWEVQTGY
TQVVVFKH
KFISPQHW
KLAINSSKYSLLL
GKVMGKVF
PGSYKILGM
YFIEPVQW
SQFELLKVL
SKKKSNLMM
YGMPRQIL
KQDFSPEVLKL
YMRDPDDQY
VFQISVHEW
SWDQQIRLW
SKYQNAELRL
GHFEKPLFL
KVYDLVKAY
SKFDWAARF
SAHEVAARW
MYSRKALY
KKKSVSLMY
NMFQIGKM
SKHQKHQAF
SKFDNIGMNAM
HQRPTFRQM
RISTHLHLW
SKKQHEAYW
KGPSPSEVAHL
GKMNYRLMM
ALNQDLRSW
KKPAPPPAL
GKYEKVLVDEGSAP
LAFRPTGW
WTKEDVNQW
GKFDVKWIF
GWVTSVKW
FVFNLIKHY
AKAAMALKM
VKVPKKISF
SAIIMHVF
TQYRAMFV
AKRLAIMMM
FPYGQYYRW
AMRWFQQKY
YQHVGRVL
YKYEDLVRM
HQFKIAFF
RLLVNPEALKI
YPKEITLTW
AQWEETVTH
YKVDYHVSL
AKFFTESRLL
AKTTKTLY
YKFKVIAY
AKMGMQPHL
SHQEARNML
VFNPIFGKW
AMYSRKALYK
SKFEYVRDF
AKRQQQLTAM
VGGSDGPGLHL
GKKGHVLSY
LPSEFDLSAFLR
STHTPAKW
SKHRAQVIYT
RKYAFELKM
YLLQGIRNY
WTFHAKGLW
KKKELFITH
SKKSVAYNY
SIFDDFAHY
KFYNGLLFY
KVIKAQQLW
TQTRLLSM
GKQENIRVM
YMLDLQKQL
SPAEIVREVL
AKAPFAAHGY
SSSYRRMF
SKDVKVQVM
SAYNVKLAW
AKKPSFPWF
LRVTPFILKKLDSI
GKFEARFF
KMKPLWVMY
AKFNPRVTF
FSLPIKESEIID
GKFLGLRAY
GKFITPAHY
TFRSKVSTW
KMKFITEIW
KVYNIQIRY
VKIQKHVTF
KGFEDEVKKL
MQYPGRTLVF
HGPQDEILSSAFKL
QKRALFFRF
KGHSFLNNLYL
WIADVGTKRW
FALKVLQW
SQTKRLKF
RKFDYDRAL
VSQMLRIVM
FLHVGTMTW
SHVPRITF
KQIDVDHVM
KVFGRPISSW
RGYPFADAAPLQL
SLKRSIVGW
YQHKRMPLL
AQMYRLTL
ALRIPRGLW
SQRPATRAF
RGAGELVESLKL
KLHYKHESW
KPWKVHAKW
YIQENKQKW
KANELQLRW
KGMKYSEIDIILL
YKKPTDFKR
AKWYPEVRH
YQTLHVRF
GKFPSLLTH
KAMTSLRW
VMVVVSRW
KFLSVLWTY
YKRIIRPFF
ALFKPGAW
SKFPGVWAH
YKKDLAKRLL
SVNPGMARW
GKYVPRAIL
SKTQIFIRF
KGPAPAAAVGALGL
KFFPKGATW
SKRDLLERF
KKREQEMFF
AKFFTESRL
KWNPVPLSY
GKFQGFARL
AKYSRPAQL
SMQTGITKW
SVFKYMALY
KLYSLGSGRW
YPKDINVKW
KVKELVSDW
YLFPNRLEW
YPAVIDQRTL
TYSLGSALRP
YLNRHLHTW
HVVRYFSAW
GKAAPGYHM
TKKGKTLMM
LTYENVERW
YLFHPIASF
GLAPTPPSM
WVLETAGRLW
KIPEELKPW
GVAEKASKW
SKNDTVYVH
SKRETEISHI
ISLKQAPLVH
SHFNQVIMM
KMKIQTSFY
GKVEVRPMM
QGSDVSLTVPKV
KWFNVRNGY
KGPKFKMPDI
MQREPNQAF
ILRYVIHLW
LQRQDERFL
YLNDLKQYW
GKQLEDGRTL
KIFKIDQMGRW
FYFAQARW
MTHNLLLNY
VPLPASAKW
AADETLRLW
AQFEAVLQH
KVRAESFDTW
AKLASYVKF
KRYDGSQQALDL
AHFNLHTAL
SKFHLPVRVY
QQWPVRSM
TVYTGIDHHW
KGMDFRDYL
YLFEWRTQY
HVRRKLSLW
GGFGNVIRW
KLFNLSKEDD
KGAPVGGHIL
KGPNVKGGVDL
KGGDPKYAHL
SMYDKVLML
KGPTWKEQATPMEL
FPATLSRSEL
KGFRSYVDLYL
AKVAFKMYL
VFIKYLPEW
SKMAHILMF
GFSEEHNTW
SAHLHVKF
AKGIRNVPY
KGHTDNVKALLL
RGPQKDELKSFIL
AKRSKIKSF
KFMNETTAQW
MKKEASVKF
TQRLKIMEY
ALHNLDRKW
RVISGHLGW
TMKVIQGLY
KIMQVNGW
EWWRVTQSY
GVFQAIKGF
RGPDELHYT
KLAVPFQW
KLKDFSGGW
FHRPPYHLL
FAFEHSEEY
GVKKPHRY
SKHRQPPEY
SKMPPPPTL
GQWPKKTL
KMFVGGLSW
LGPALKDAVLEL
KGAKLKVGQYL
KLGEFAKVLEL
KIFAYINSW
AWKPESPLW
NVFQRVLSW
KGYTEVLKLLI
GKFFSRLSY
RKQPVKIVY
KLLYPVSKY
AMFVASKY
KTKEVIQEW
KTKEVLQEW
GKVEAEVKRL
RGPLPLNKTLFL
SFAEIIMGY
VIFQKVKEW
LPWKMPSSW
AQAPRQAVW
KFYEGTFNW
RGFREVDELFL
GFYPDHVELTW
RGYYDVAKQLL
PFFRTLGW
RKMEQEPVM
LGPPPTGLHL
FKKTKDMMV
KVYNITKW
LPPSLTQQQF
IMKDKDNFW
NKKEPGPGF
TVRAFDLHRY
GKRVFETRY
AKQYKISKF
AQHITYVH
GKKFKGPEF
RKFSNPRQL
YKHFWTAES
GKLEKTPLYL
GKFYPELKL
RKLRGHVSH
TYSLGSALRPTTSR
AIFKAFAM
VHRQVAIVF
SSFDNIRAWL
AKKKMVVM
SQRDREEAL
AKKEHVPTWL
TGPSDWRILYL
RAFKDFQQW
SQFKDHPTL
SKMLKMQML
SLHARIEQW
KYPDLANFW
RKHFPSVNW
VKKTLNPVY
RMYELVHRM
HAFAGSAAW
KVLQKFLTY
HLQKLVHHW
AHKQKSLQF
QQPPPPPTY
RVIDEAKKW
KLTVGEVYKLLL
RPYGRRPQY
SQHGLSKVV
VKMPAVLTF
TYRENTEAW
AKDDKIRYY
SQNSRLRSM
AHRPKDPEF
SQKDTFHSF
TKAETDHLF
AHYPSQPVF
SKMWKQQIA
KQFVAKVM
SMHFLVAEW
SDVSLTVPKV
SKISRPYKM
AKKENHLNF
AQDVGRMF
KGPSPTPQDISM
SAMYSRKALYK
AMDNTVRVW
KFFEMVNTI
KFHRPMYY
RGPGLRNAFRL
RKLWKSHSM
YILDLQKYW
LVRNFVHLW
TQFVHHAL
AQHSAIKM
AKRYIDQKF
SQINKAYQF
RKRWQNMKF
YKRPMDGTY
RLRVTAAFW
TGGSHDKRFVM
SKKETKYSL
SKRKRDEWL
RIFGSNKW
WIRTQQYYY
GKYGPIRQI
KVREEMSTW
IAKIPNFW
AKYELVKAL
SKVQARIAF
SKNLMIVH
ALNEDLRSW
AKKWIQARY
TTSTRTYSLGSA
AMRPPHPGM
RGPANLQHLIL
VFKPISSTW
KALYISSRW
AHFRNMSL
RLLLIKEAFQL
GQKVSMHY
GLKGVAHLW
AQYGNILKH
KLNNLVKEW
SQFQVEKTL
AVKAIIHQY
KMKEREEAW
HMHNRFVVY
KIKVPVDW
QKFDQKQEL
AMKTRQAFY
GQMVNMHM
HVIDVKFLY
ELFRRLQKW
AAFFYDRVW
SKYDEERSL
SKINALMH
GQYPTQPTY
KQIKFLLGW
KIHISKKW
SKWEKVQQL
VGPELHHKL
RGPDPPTGVRL
RVLENVQHY
VNFKLLSH
VVFNDIKLW
GKLEDVPRF
AQFFRVYL
KLHLNLTELAL
AKQKKEKVW
SKQHLRLVF
SKLGWIYEF
KVRPVHFWF
HVYDRLARY
SSKRQVDPEF
SQNEEAHVM
KGPTVKGDVDVSL
AQYLINVRL
FPQDQIRLW
WQPDRQIPF
HVMEVYSW
SLFKGNFW
MVHEGNQRW
KVRYMDLLW
YLHDFLKYL
WKKIQQNTF
AAVKTYRW
AKHERHIFL
GKKLPRTF
SAYGSVKAY
ELFEGVQKW
SLDKTIRLW
SKFDSERSI
RFRKAPPNY
SQYQHFTY
GAYRLWVRW
VHMVHVTF
IPVPGPSQWEEASM
ASYVHYVF
KAMTGVEQW
SKRLLDHIW
AKHSANMNF
TVFQYPVGW
KGFLFLHTL
TKKPHVFQL
WKQDHNPLY
HQRPYVVTF
RGPSITEKEVL
GKTTILKKF
FFRELQQFY
TKPQPSPSF
KFWKGSSY
FIRPVDPEY
HPPPPPPPP
GQGPRPAAM
SQIEEHKVF
RKKLENPKM
SKFKPQKM
KMMAVPDSW
RGPVLEHGL
FQSIPRVF
AMFDQSQIQEF
RKMERTEMM
SHPPIPPVF
QVAPKTLPW
SIFLIDHAW
SMLDHLTQW
RKFMTNRLL
SMKEVDEQM
HINEGKLW
KLVDGLATSW
SKFEPVLQW
QQMQRQLM
VFREVEMLY
HQVVVAKY
GHFLRHYY
KWKDYTSRI
VKSGAAHTF
SLSTYRLYW
EQTRHISF
TKYPDEKRL
AQTWKHQL
AVKSPSQSLRL
KFQKNNYKW
AQMFRLHL
AKAPRLVY
AVNKVIKSY
WVIPRTGNW
YVFERFPTY
SKSEVAYKF
AKHIFPVTF
GKFHPELKL
YKVPQVRVL
GQVLRAWL
QQFQALKM
AQFETKKLY
GKWMGIAF
KFLSENLMW
YLRESGWYW
YPPPLTEKTL
SKFDKGNLY
TKIQHILTY
KIADMGHLKY
SVNKEIARY
AKMMDPRVL
AKRKTVTAM
GVMSAIKEW
VWTRAYGW
GKIELIKMF
QGALLTHFL
RLFGAVVRW
QLFPMKFRW
TQVFRVNL
YLWRTSLY
KGADKSSNFLYL
AKLQRMQEL
GVYPASPSSW
SQMTKMLDL
AKFAEEFYSF
RARPDVHLW
KINRSMQNW
ALNPLRAFW
YKRPFNEGF
HLNAPLMW
KVRPYYFDF
YASGRTTGIVMD
AKKENGPTL
VKFTHDQIM
KSFENISKW
TQHLHVTY
IKDEKSPEW
VQVVKWYL
KGYQSVTLLLM
SPPSKRDIDKSM
GKLEKTPLY
SKKPPKPQL
KLVVTQEDVEL
KLQNLSLEGLRL
QVAEMLGHKY
SKPENLKLTM
RGPPGEVIHL
SKYHRFISF
VMYRIIEM
SHRRAILM
SKFQKLETF
KKRPEDFKF
TQQLMRVY
FINPKPISY
GFKEAAEKF
HLKIVYRRFRHG
SHRSPLSAA
SKFSQKIRY
KVKAQLNYW
KVYNAVANLW
HVLKHPFFW
SMPDVSLHL
MQREVSVQY
RKYYLPHLF
GKIEVEKPF
ALFRELVSW
AQQIQKVVM
LPFSRTYYW
FPPNLEKPTL
SKRLITYRL
MQWISSKL
TVKEEFMPW
QQQQPQHAF
KMNPQTAFF
GQLPHTVSW
GQYDVPKWL
YQHQRQQM
KKYGKSLYY
SMLIKALW
ALLERMPVM
KLFVGGLDW
KISYDVVKRW
TKKENVKPF
HKRLPDVRF
SQMNQALRL
SKSDRLYAM
KGFTGSVADLAF
KWLIKIKEW
AQRPTEQEM
KFRENVPAW
VVHPFYAYW
YVFRYAAKF
EEGSKPRAIVV
KMYGDLDVLFL
FKVKSHVY
SAFKIQRW
KMMDAFDAW
SKMDRHSVL
YIFIHRKW
MGMFYRTIR
TQMNHIVM
IKRPDDRAHL
RVLKIPVTW
GKLPRSPSF
YVQRMKSKW
SMIEAMERL
GKNQAKFSL
KGPEFLENGITL
VPLHPAFW
SKAYIHTRM
GMWKTSFAW
KGVLQPLAVLEL
AQDEHLITF
LGFSATDKLYL
KPFTPAKY
HKIHGVPAM
RLQQLKSEW
AKDQSIRVW
SKYTGPLQY
RVHNSTFLW
VFFKNARQW
SAHLMVAGW
AKKGPNPLM
QKRPKEEEW
AKYPDRVPVI
AFFSRVETY
SQFTHLAW
KVFERYKSY
GQFKPSRSIVF
SLNEDLRSW
VKFGADARALM
RGHHEVAALLL
GVKPPQNLW
SKIMIFVTF
KGDNINIKQLLL
YMLRLTDRW
SVYKAFVM
KKHEDVKQY
SQFQKRLTF
SPLNPKLW
SQLEAYRVY
AKHDSMKVVF
SKPLPSQVW
SLRGLVHVW
KGPKVKGDVD
WLLSHLEKW
GKHQYPHRH
SHLDKASVM
AKFSATPRY
KGGPKQQSEEDLLL
GKFFSQMSY
VTNPHSSQW
FLYNHVAMW
RGPPLREGEEL
KLKNVIAQW
FKLPLTPVF
TVRELKLFF
KVIGAGKSW
RVYKSLKVW
TKYFPSHHSY
TFLKRTYEY
HIFPASRW
SKYPKTKKYL
EQYRKMVM
AKLNVVIVR
HQVNRQVF
AQNPSEEKM
PQRATSNVF
YKKDAKLVM
RGHADIVQLLL
QKYPREYAM
KGPSLKTFTHL
SQAAAKLAL
SIMEKHNQW
MKMRGQAF
KLVSDIANAW
LPRLPEEWSQW
KLQSLLQKW
SLIRLVKHW
SLLRLVKHW
MQIKNQQM
AKFKKYEEIDNAP
KLSDIKSTW
YIRSETYKY
AWRTATEEW
SQRPATRAFL
GHFDAPVQF
GKQGKHILY
NQHVKSAL
GKNPKPEEL
KLDLPDDLIGY
KLRPLWKSY
KINNHTHIW
ITYTFHSTW
SKNPHIVSF
SQMLRIVM
TQTMRVKL
SVSNKLLAW
LPFIPPQRW
IVYTDPHFW
TKMSVHLIH
KGMTLVTPLQL
SKMDIPNTF
GKVQKILIW
AGGHKLGLALELEA
KVLERASWW
TKKEKDQAW
SQTDPSPSM
SKIATMETM
KIYKAYKW
RQRYEDRIF
SKKIAHSVF
SKAPVHNGL
AFYDPTHAW
SKSDDFSTF
SLLDPFPRY
SHYPFFSTF
AQIYKKYAL
KLLDVLQQY
AVASFPKKQD
AKVDHVQM
AQILAYKM
AQFLRERLF
SVFREINTW
KVQYVIQGY
PPHPPPPPP
AKVEVNIPR
KLTDITNIYW
KQMEQISQF
KLTELLRYY
KGFTPYYARL
TKETQTPVM
AKIVPPKEW
SKITHPVY
SKRSKVNLM
SKYAPSYYH
TKKYIERVL
GTFLGNKW
KLFDKLLEY
SEFYKHIVL
AILKKVIQW
LPQRIVARY
SKEDSKMIF
HHFDSILSM
YKLLHILEF
AKAPYLAKF
QLYETIQRW
KVKNSQSFF
SAFDSLRLW
HGGPSPGFF
RSLNIQLKW
MWKTTFAW
SLRGLNPPH
GKPPISVKF
RVLDRSLLEY
QKLSRVINM
GFLNRKHEW
SQFDEHVGY
GFLRVPKW
NQRSMTAQF
KGYDGVKRW
YVNADHGLY
SKKEKDKEIKL
KLMYPVSRY
KVWKGLFY
NQHTRVAL
KAFGQNSGW
HLRAEDALFF
GREFSGRAL
GQVVIIHM
AQREADMHRL
ITTKVISRW
KVASALEKW
GKLEQVRSL
KKFENTEMF
AKMISAVVW
SKTPTGPEL
GNFGGSRNM
KVQDSTMQW
KVISSVSYY
EQHIPGSPF
SLRQPPVAF
HQRSFTETM
QGPGGGAQASALEL
AKINEIRQM
SMDETHPGY
VKKLKDYAF
SHLPQQLKF
GKNIRVVVM
YQRMPGNAM
KGPKVKGEVDVSL
SQFPKAKL
SHNIQAMY
SVKRNQAVW
KWNAVAMW
SKMSELQSY
VKDNPKKSY
AKRLAIMM
IPPAPTKPDF
ALLDQVEHW
SHRPDSPAL
KSFQVAAKW
FQMARVIF
GGMTGFHM
KGPLPGPAAGL
AKFMPVSSL
KKRKFQPLF
SKDNTAKLF
HKYEPTSTL
AQRPGPMEL
SHFDGIRAL
KIKAVLQEY
TKNGHVYKY
AKKAKPAML
RVFERVANI
HHMQSISF
SMLEFVQQL
YVHKPYLY
GKFMKPGKVVL
AKTFHHVY
QQFRNAPPF
HMMEKIKSY
KMTSAIARW
TKYGKGNYF
ALFAHILLY
YQKTPQEW
SLDKKKALW
KGPQVTGEL
EKPPAPPSL
GQVIMSIR
AGMTHIVR
KQFQSPSTL
TKFGKYPVL
EKRQMERIL
SMVPPEWHRW
WQDDTGPPM
SMFAGVPTM
HQRHKTVAL
LKHPFFYPL
YVTTSTRTY
SLFKSLSRY
SKNPQHHLF
RLRKLLLEW
SQDYPTLAF
FIFVNVEKW
FFFSHVGW
GQRPTQPVY
GVVEGIIRY
VQFSHHVF
QQQDQKPIF
RKRGFEVVYM
SIFDDFSHY
GMWKTTFAW
SQSYYTVAH
MQIFVKTL
YFHPLLRNW
VWNAVTQHW
EKYEGHQQF
AQFHPEVGL
QQAKRMAW
QKMNHSITM
GMRKTFARY
NQRPPYGYY
SQRFPLPSM
AKLLSHPFL
FKFGKELTF
SKYAPIEGNRY
MQFGQLLTH
MQYEEDSYNHIM
REYGRRLVM
FKRKYSSMF
HKYFLPRAY
FLREFHKW
SGIERMGP
RVSGETDLSKALVL
RKMEKIRQL
TKTGTAYTF
KTFDRGMVW
FSYRDVNLW
SFRAVLEMW
SQNPVVIIR
KLYYDKRWY
KKRERQVLF
YSIVPQSW
GKSSLLLRF
VQHIHVKF
RKHSVMLEF
VGAPMHDLL
SKVDHVMQL
KLRGHVSH
RVWQEARLW
FVVKNPSSW
AKDEVAHTL
SKFKAARL
KLFEAPNFF
AQNDFPVAM
KVFESIGKF
SHFRWSAL
QKREHERQL
AKVKQRIEY
YLHQPALEW
KFLGDIEVW
RMNKVFHIW
SFLREFHKW
LQFPVGRVH
GKKEKPPFL
KLLTKGLSW
GQFEELLRL
GTFFPKPW
KGPVREGDVLTL
IQFEIAHAY
SKHRAQVIYTR
TQAARKLL
QVLVDIRLW
KVFERAVQY
YALRPETW
DLFRGTHYW
IQKSDEGHPF
QQTLPPPVF
SKTTRFAL
SKFGSVPKF
FKVERPEY
GKKKDTPTL
VAGSAESAALRL
TQAVMKVY
AHFPHQVL
GFQNQVKKW
KTLLKIFAW
RLFGATGSW
KGAPVGGHILSYLL
TVYPKPEEW
AKLERSHYL
GKFGFAESM
KVLEKIESY
GKTLSVKVM
KTFSVTGW
SQFQKTYSL
AQYDRQIRL
TQVRHMKF
KAKANLIGW
YVTHPERW
AKYKNQVVY
KMHDKVFAY
SSHKTFRIKR
RKMIQHAVF
TPKAPSGW
MVFEAVMRW
WLHDIILGY
AKLPKQFKF
AQMNRAVY
KGPKILDHL
AQFETKKL
KLLVEKKFLAL
RLVVEESSFLTL
AQYFKKVL
SVHGFQMLY
KGPIHSPVEL
HKFHHTIGGSRRAA
FKRQQEQGF
GLFAHHSLW
KVLQVQNPW
AKFPLPMEV
KANPGYKW
LGPPATAVPEL
TKISTHVSF
SQAEKVYIM
TQMKKVML
TPFPVIRW
TQVRAMMY
KGPEFREFLL
TQLVHVYL
KFINDTATW
TFFTPPSHW
GKNIRIVVM
GKLSHLTSL
TQNIRKVF
SKNKQEMAF
KGHTDVVRYLL
KVRGENFFW
GKLYQPHTF
SQFKYALVW
GKNNRLFVF
EQMFRLLM
AKFVSWKS
AKARLNQYF
AKYPEIKSL
KVIQSVANY
SKYQTVEKL
SANGKVSFW
SQKISGPQY
PKFEVVEKPQS
GKMGKGVSF
AKNPRINQL
GGYGGRSRY
KGPLVLQQAYL
KVWGEVGRW
WMFTQHGRL
TQVRVEFM
LPREISHKW
EQREPAPEA
FVRSIVAQW
SVTEVQLRF
RMIDGKPEY
SQFSSVIMH
HGPTGSFKDLSL
SKVKHFAF
KAKREVSSW
KGPKVKGDVDISL
VVRNITYKY
GSHSLRYF
GKVEAEHVL
TQHRIPVY
AKLRSIMM
TQFRMMVPL
AQFYRPIL
SSAPTARVF
KGFDVFNALDL
TKHEWRPLF
KLIDIFRKY
KLFDRPQEL
SKFGQIRKL
AVKLPHLW
SMDEKKKEW
QKKDTGHVY
[truncated: 4,641 more rows]

## Sheet: 2229_A14
SHMLSAKL
SKLNKVTQL
DAPELIHDFL
GKHKNKPDM
TQHVQETY
SKAVSRLW
GQRLVYQF
AKVEGQRL
AHKANTLVY
RGSIGFLYL
RGSIGFLY
KLLPRPEMW
SQQRALAL
QQFLKIYL
GKRPKPKTL
AKLLTAAEL
SKYHRFISF
HGAGLTHLLFL
HGAGLTHLL
AKAPRLVY
SKRWSDYTL
KMEKDVYAVLQL
KQVKKSVF
KKRERQVLF
SKQASAVVF
AVNSLISRY
RGGSFENNWNIYKL
VSWHDVAGW
SKMGMEAVM
SQHARGPAF
HVIDVKFLY
RVDPNGSRYLL
GMYGKIAVM
STVRLYEW
GQTRVLML
GKIAVMELF
SHLSDQLTL
KGAHSKNLFL
KGYWLVTVL
SQHEKAALYF
TAFRYLAQY
SQHEKAALY
SKWSAELAF
KLNPRYLGAW
GQVKNEAL
SQHEKAAL
GVMNSLQDRYGSY
AQKVSSQSF
SSVSHSVL
RGPQMPLIFL
AKMMTNLVM
GAVIHLAL
KGGYLKGLL
QKHNILLKY
GAWHAQIQW
KGSSNHHLL
KGPAGPPEL
SQKISGPQY
SKDPSQRPSM
SVFVKNVGW
KMIDKKAMY
SQRDPPHNNF
KGLGAEIAKNLIL
AQYDRQIRL
AQEIVKAL
KISYDVVKRW
MPPNLQKVDL
RGSAYAGFL
QQREKEIAF
AKVLKTVTF
AKVENQYQL
VLLKKTFSW
SKVNIIPII
RGPPGEVIHL
GKFMPIMQW
AKYSRPAQL
VKVPKKISF
KLLDVLQQY
SKRKEDLEA
KFRTWRQLW
YVKTVEKW
TKLPFIVVM
AKQDVVLNYPM
YFNPKTRKF
RLWISVARY
VKTKKFTL
AKRLWGDIY
AKQDVVLNY
VQQLRYIL
AKMMLIVNM
KDLRLAIAL
FQELLKVM
GQKVQKVM
RIMLKGDNITL
DEYMNLVL
IGFDEYMNL
SQVSKLTL
AKAAGSLEL
SKLPKDTAL
GKGHSVVF
SKVSSQPKA
KGAAELEKMTL
KLKDIRNAW
AKAKPAPTT
KKRKASPAL
SKLPAAKGF
AKFPNEKVL
VQAQKKIL
SKASKTFSF
GAVIPGPPF
GKNPTDAYL
GIYRANRW
VKRYNDYKL
KVLDKLLLY
SKHNLGIFY
VQIVNNKF
MQAVRLPLM
GQQLDPHAL
SLYSLPKL
AQVVKGEL
SQYRKSLM
FKIVRVLEM
SKFKAFTF
SKLSRRLQM
SKVTKILVA
LGFTDVNKIYL
KKKEKDVQF
RKRKLDTIL
SLAVDPNGIYL
SHFDGVRAL
KLWKDEGRW
SKLHKNPEL
SLREEDRTL
SKREEGSL
YLGGHIQGALNL
GQIVQSKI
SQIRHLVR
AKIPHLYSL
YWHGGFAW
GKKMMQEAM
RGADKVNTFSALLL
YKKKKMEVF
WYPDHLKHLY
RGAMLSLATGL
ALMNGVTSW
GLRPLDVAF
VKKGFDFTL
FKRQDAEM
LIREKDEEL
AGPPGRSSLDSIEM
SQARALITF
SQFQKQLL
KIEVLPSHLFL
VLPSHLFL
QQARRLAM
RVLKIPVTW
ALRDLKIQW
HPRERTALW
RGPVRGISIKL
SARPVTQAF
VVIEDIKRW
ELREKDRLL
QMFGQLARF
RPMYPILKY
RGGNSGGSDLVL
KLYYDKRWY
SQGKKRTF
AQTWKHQL
YKFKAQEL
RKYGSVTVW
RGFYSVETF
MKFFQKAAL
QQTLPPPVF
RKRRSDPNF
IQMKMEKL
SKMDLIEHY
AKLDPLRGHYF
AKATQAQKL
AKGKVPKSAL
SAHVPNTY
KGSWATHKL
SKNKAVGVM
KAKREVSSW
AQFEHTLL
GFFVPHGY
RKKEEEKRL
KKREEEKEL
ADLKVLQQF
HQFKIAFF
SQVDRVVL
SQKHIDFSL
TQVFKLGL
MKLDYILGL
AGPSRTVGLFL
SHFVKLLF
AQKEELQSL
SQRALESEL
PRGPPPPAL
RGPPPPALF
GKYSGVSLY
SKRDLLERF
TKISTHVSF
SKAKTRVF
VKFDGNKQHY
SQRYPDIRI
SQRRSPPTM
GHFSALVAM
SQFIHLYL
GKDGVKLLY
AMLERLLSL
TQKPITSF
AKPLKKAVVM
GQNASVLAY
GQFDAAKAV
YLWHIPVTY
KFNEVAAQY
AQQGKRKTL
QQGKRKTL
VKADPDVTL
AQHSAIKML
AQHSAIKM
HGPAMQHFL
RGAGPGDAVL
GQKENVVVY
RLRDGHFKY
GKRDEEHEL
AKALYVANF
QKNEFISEY
VLFEVAHQW
GIYKVVRYW
SKYAPIEGNRY
GKQDPDKQLM
GQVVMVNY
GVNPHVNHLY
GKHPAKFSL
GKSTSIQSF
AKAPKPKAA
KGAKLKVGQYL
RFRQEKAVW
GQVVKVVVL
KLKDGTLAY
KGSRGVVTL
GQVVKVVV
KGGQLLVSL
SAHWPIFKW
YKLDKQHTF
GKFFARMTL
GKIELIKMF
LPPVLTHLNL
SEFYKHIVL
IMKDKDNFW
HKYEFDLAF
TFLKRTYEY
GKLHPSSSL
RKFFKFQVL
IKQEPDPTW
SKVEKARQL
RKFGEAIGM
KGPVTIPYPL
KGHKEIAQYLL
SKTERINAL
SSTIRSML
KFRTKSRTW
TKKGIGPVY
VKREINEEM
RKRDYEGYL
LGPDWHEGLDL
RGPLVNASL
SKRIAVAL
AGPGFINIHL
ALLDQVEHW
KSFGRIRKW
SKIGDVIVL
AQLKQKVL
GSWRVLAV
SGHVGVIF
SVRAVAVW
SHRQPETVL
AKYPAPERL
KLFDAPLSI
YSYVPPQW
SKFDWAARF
GKLMAKAIM
EQFPVKVH
SQDLKIVV
AKKPKALQH
SEFINSKL
AQLELISRI
VKKEVEKKL
YQHKRISL
AFLRPLLW
VQRDGDPAF
GFPPAVQRW
GQHPVLLAL
KGSPLDQFL
GKEETRRFY
TQRDFMLSF
VKRPGDLNV
KKREQEMFF
AKFQEQLKL
AKSDPPTLL
GLDPTGAWHAW
LQRIPDPTM
RGPPEKPKL
VQTLRQLL
RGMDNRYLVL
YKIMPLEL
RKRWPAMTY
KVIDKRLWGW
LLIEKVDSEIL
AKLDSLQTL
GFLKLQQKW
KGMGKETTLLL
GKVKSVEL
KIFKPWKW
HKHEFDSRW
LPLHIAPRW
ALPLHIAPRW
KVTRVVLLW
RGFENLFML
RGFENLFM
YQKTPQEW
YARRHHWW
IVMGGVSGW
FLFQKVGKL
SMQTGITKW
SQKETNRQL
SKREASPSL
AAFQNVLTH
AQKQAEKL
IIHKPAEW
ALKETLIEW
TFFTPPSHW
KKKPAGPSV
SKERSGVSL
AAFDQWREW
TQRIVAPPG
FLRERLLGW
AQKINVPAF
TQHKVLEL
KLTVGEVYKLLL
RMKEVGKVFL
IQRDDTERF
GKFEWGSKH
AQWKVRAL
RMRAILVDW
KWNLKQQYY
KGPSPTPQDISM
YVKDIYQYL
AKYLMELTL
SKLLKISTI
ALAQLSRW
SKYAFQEAL
FLHAIRLHW
AKLGFVSGL
SQEIMRMF
SMVPPEWHRW
KQFFGRHRW
RWLEGIRKW
GKLWKHIKH
HINEGKLW
AKWDYDKNEWKK
AAPFFIVRHQLLKK
YAFSARPL
LGPRGLVVL
QQYNSFVSL
KAKTNVKLW
VQKHNIQAL
SILESLDKW
AKKRKMFESF
GQYFGELAL
GVNDIKNHKW
LPSEFDLSAFLR
IQRPPKIQVYSRH
QPRIVKWDRDL
IQRPPKIQVY
LEQPRIVKWDRDL
EQPRIVKWDRDL
PRIVKWDRDL
IQRPPKIQVYS
VNFKLLSH
SHSLLVTL
AKPKVAKPK
SAIESKHF
NKELDPVQKL
PKFEVVEKPQS
AKDEGPKAF
KVFERYKSY
SAYGSVKAY
KKYGKSLYY
KGDYQKALLYL
TKKELASAL
GVSDIKTHKW
YKTEEKPIF
RPPTFGDASVIAL
TEFKANAM
GKRPPGVLH
QQDVVKKSY
KKMEVRAIF
GKAAGAEEY
SQALVRSF
DWVPYINGKFKKDD
GKFKRPTL
EKLDSVIEF
TGPMVEDSGSLLL
TQFVHHAL
GKISKQEAY
SLRSHFEQW
SSYGSGRRF
GKKRGFAF
GKIEVIEIM
SQRAGLQF
LQFPVGRIH
NKRISFLY
RSPHIPYKLLHL
EQRKAWKM
HEFLIAAL
AKYDEIKKVVK
FQYDSTHGKF
GKFNGTVKA
FQYDSTHGK
MVHMASKE
GKLTGMAF
GKFEDMAKA
GKMSSYAF
AKADKARY
KAAVEDPRVLLL
GKVEVRPMM
GKVEVRPM
GQIVQFKL
SHNIGIAM
YLWRTSLY
YKEEGLKAF
SKPEQLVVTF
YLWNNIKKW
GFRLNEHLY
KKAQAQPVM
RQKEQEHMI
SKWSGPLSL
GKFKVASF
AQREGAKY
GKKEPMQVWF
YGFVNHAL
HGILSHINTVFVL
VKIQKHVTF
SFDVTGVVRQW
TQYSKVLAL
VPPGPLPEAIL
KSFYPEEVSSMVL
KMKEIAEAYL
KMKEIAEAY
QVYEGERAM
KGPAVGIDL
AMNPTNTVF
SWAKGTARW
KKMEFGIVY
GVVKKVAQY
AKYPIKQSL
KQFGPLVRW
SKFNIPDLKVGTL
GAHSVGLMW
FQMEQYIY
GQRAVLKF
VQRDVQELY
GHFPSPIRL
QFSPTAIDARW
HAWQHRQW
AEIVHLTL
SKAVVQVF
GVFKIASW
AKFYPEDVA
NKKGTDLWL
SQWNNDNPL
KGYPIDLYYL
SGMGVIVH
KIFPMGDRLYI
VQTVAQRL
GKWEKPFEM
SHFSHLAW
HLAAAANHRW
AKGEKFVM
EQLLRVQL
MIREQDLQL
KTFTGHREW
YKYLQKPMY
EQIHAHTL
AGPSIRGALVL
RVFQKYSKY
SKHDMNKVL
AQRQQIKAA
SEFLKQAW
QQIKAAYL
GKMALNHPY
GKMALNHPYF
SGIVHQEL
AHVSRVIL
QKRKPETPR
KMYDAAKLLY
SKFKPQKM
SKMKAHTM
SLFKSLSRY
YLFKGNNRW
GQVQKIVLY
KMREHLELFW
GQVQKIVL
GQLVKMLLF
GQLVKMLL
GKSPYLYPL
GKYIPSIAEQM
SKFLRTKGL
RQASRHPKY
TVQQLVGRW
VMMQGRFHMY
QKLEQFVSL
RGPDGAIFEL
AQKLPLTL
YQMTKNEM
AMLRQLAQY
GVFRKFSRF
VVHMKQKGKK
GKVGFQSFF
MKFNPFVTSD
VQVVRGHY
GQQIGKVV
RGFDKAYVVL
YKYAAGVRNPQ
GKFGPALSV
YKIKYPENFFL
SKPGKNVQL
GQYYDLLRL
AKRQLVTLF
SKIKSFVKVY
GKFMKPGKV
AKRSKIKSF
GKFMKPGKVVL
GKFMKPGKVVLVL
SKIKSFVKV
SKIKSFVK
FRDGDILGKYVD
LQAQRNEL
QQLYWSHPR
DIGFIKLD
FKKQNQPKF
IVRKDRHLW
AARLIQTTW
SQVIQQRF
SKIRMIIAV
SILTLQKHY
SALKIQRW
RIAKIQALW
RHREKTLAL
SKINVNEIF
KPLNPALW
MQIFVKTL
IQKESTLHL
KQLEDGRTL
VKLAVLKYY
IQKESTLHLVL
GKMERQVFL
GHTNNLRPKKKVK
SQAESKVFY
YQHSKVNQW
GQFALSGSW
TKDVLSVAF
GQFHDLMEL
RKYGNANVW
SQKARHPQL
KGFPAEFAMYL
QMISRIEY
FQRTAWVF
RGGPNIITL
GVKKPHRY
TIMPKDIQL
GKAPRKQL
AQDFKTDL
KLFEVPDTW
SKKLEMHVY
VQKVSKKL
QKVSKKLEM
GKRKLEEVL
SKQHLRLVF
KGFGSDKEAILEL
RQQIRQTF
SAVARVEL
KLTSTVMLW
GRMRHLKIVY
LSSFIDPKKQPAT
KGAYIELTL
VVKPHTPLI
VKRLLSLEM
RGGHLTIRLAL
RKRAQEVLL
RKPALELLHYL
ILHIPDAHLW
KGFNDDVLLQL
SKMFFTTKH
KMFFTTKHRW
GKAWGILTF
GKKEMRILM
GQDKIRPL
HGYVESEPLTLQL
SQYQHFTYL
SQYQHFTY
AGGHPSVQL
YKFYSVNVDYSK
AKRHPSLIP
RVRELYRAW
RVSPVERFW
KFLQDGALW
YFKHPISRW
RFLKLLRFY
SKFEYVRDF
IKPNDSRALHL
GQRELIESY
KGVNVVPFL
KGPLLLYTL
YKILAHLW
SKTTRFAL
LGPALKDAVLEL
MQILARLL
LGPALKDAVL
AKKQMLISL
AKKPSFPWF
GKYKAHFF
YLTGIAGKW
AQHQGRPF
SKAFTAKTS
RLAAHLGSALVL
AKATTVPDF
VKRIKEMDL
AKDFNHYKM
AKKFTMIPF
SKVQRLLSM
TKRPVAVY
AQRKFAHSL
KVKKTIPSW
KGFSGTFQL
KGASGTFQL
AQYGKLESL
LKRPQDQGL
SKIGKYVAL
MKRKWEATL
LGPPHPVAL
VKSYPGPQL
AQKLRLAY
TKKVTSVVF
AKFIASTGM
HKIDKSHEF
SSKEKAAVF
KEGSSKEKAAVF
IQADEPAAL
AKDDKIRYY
KLKAINENW
SQKQVYIQL
KLNLQTFQW
GKDSFKRIF
SQPLHIVL
AKAQNKPFY
AKMLLRVH
KLVSDIANAW
TKMLNHVL
SQNQKRLY
QKRLYIMTL
SKNGKDLGL
AQVAQTKF
HKMDQAIIF
SQVRFLVL
SKAPESFVV
TVFDMSGQGRY
AKKAFAVVA
IQLDHLNL
IQTATRDL
KGLPVEPVL
VLKKYPHLW
KVLKKYPHLW
RGAPLSSAPIL
RGPNGVWTL
RGPNGVWTLL
AKYELVKAL
SKTIAEIF
RGPFADENFKL
VQKDIQPYM
YMRRMVATW
SKLKETIPL
SQLPKLLVY
GKVKLVVRY
SHPRVVEL
QKRPQGLSF
SQFEKFVRF
KTFSVTGW
SQINKPNF
GVAERSWLY
AQKTLFPL
GREEPDLVL
SKYWKEECFG
RILNKLTKW
SKFIGYTL
GGPGKGMFTRLYL
YLNVLNRHHW
KGLDTVVGLL
SKDEILLTL
RGPDPPTGVRL
RKLMMILAM
AKLKKFIAY
RLFQVSTLDAAL
GQARKSQL
SKSIAPSIF
AKAGITTTL
GLSDELAKQLW
QEYLRAVM
SHFPRTARW
RLDLNRKEVLTLRL
QAMKHIVM
AQLQTTLKW
RQPLRVQHRALEL
KGFVHKVEL
MLYGMKIANL
RGVPLLPSDVKLKL
RLDLNRKEVLTL
QKHGLGYSL
SQAPFLVAL
SKYSTIPKF
KFKEKSAEY
MGPVDARIYL
KGSLVDYL
AQLKQKVM
YKLLKPSL
LLREQVAQL
RKLERIARL
AKAPPPPRP
QPHAGALW
AKSPKRPKL
GWVTSVKW
GQFLRMPLF
GQFLRMPL
MMRKPSPAY
GMKEVTRTW
SKHNLMFLF
VQTIRNVF
SKIEIHAKL
AKTLKIKY
FIKDKSAVY
KLVVTQEDVEL
SLHARIEQW
AKVPKRASM
RKFDRILYV
AKKAADAEPVL
YQSKMLAL
AQDKEHPRY
SKAAVMATL
KVFADYEAY
FALLQQPL
RKREDDKLFL
GQFPSPHHH
RIKELPELW
SKISEIRQM
KVVKFSYMW
TQIKVVKF
FQAHKAIL
KKKERGHTY
SKKEASRHAIM
AQNAVRLHY
AQRVRAAMF
YKKRLSVEL
AQRVRAAM
SKKEASRHAI
FKSGGIPAL
KMRWTNLLY
AQAQPGLLF
LPPPPIKHNM
SQLRHIRL
GKKSDQREL
LQRDFSETY
SKQELIKEY
AAFDKIQQL
FQFRHLSL
SKVDTGVIL
HGYYEPTLLIL
QKVHPVIW
AKRDALLLSF
GKNGALSVL
AKRDALLL
GQYGNPLNKY
SQADVNLKM
AHFPHQVL
GSKIKKLVY
ARGSKIKKLVY
SKIKKLVY
AKHTNFVEF
RLMAEYKQLTL
SQLQRNIL
VQARHIVV
SKMLQHIDY
GKSSKMLQH
KAFDKHMNLIL
TKFETVHQI
ILDIEPQTLKI
HKQDKVAIL
KGAQADVVL
AQKDRVLTL
RKRYSDVML
TKVGTPVSL
GQRFTVQM
SKPDRRHPLY
RSFQNVHEW
RQFRMRVR
SGFGKNSL
GFFHAHISY
QQFLRHYL
GKAGRGVVF
KGFPHVIYARL
AKRAIESLV
TQFEGKRISF
YALRPETW
KKKQVGPEM
GHRMPGPTM
GQYTNIKKF
QQIVRETF
AFYDPTHAW
SQPEKVYTL
YQHTGAVL
RLKYQHTGAVL
SQSNRLMM
RGPPLREGEEL
KPWFDFRKW
AKKAKTVKY
MTVKEQQEW
AKGYTIPL
VGVWSHEGLVL
RGSHIVGLL
KLGTEPAEALVL
SVQPYSHEW
KKFGGVQEL
WMRSHQSAY
YVNADHGLY
AKIQAMETAM
SLFPRQRKY
YQWLRPEL
VQRSKSFSL
AQREHEEYL
SQVGHVAL
SKHAKISTL
FQIRQMEM
TKFQIRQM
AMFVASKY
AKYLMELTM
EQAVKPKY
AKISTLAQL
YVKDIYAYL
RQMEMKIL
VQDLAKAV
AKRVPVAAV
KLKEVFSRY
KGVTGDPLLTL
FPASPPKGYF
FKAGKALVI
GQFRSYVW
VGPPPPPQL
RGLVNLRHLIL
KRYDGSQQALDL
KRYDGSQQALD
RKYDKSWLL
SKSAIAKSV
AKRDAEAHPWL
SVRPDDYLLW
GMFNRMAKW
SKIAGILHY
SKFKNSLVVSF
SKFKNSLVV
RGSQYQPIL
FKNSLVVSF
SALGALGQW
RKYDEVLHM
KNFDKLSFLYL
KNFDKLSFLY
KNGVPAVGL
VKISKVKY
KNFDKLSF
DKLSFLYL
KGAPVGGHILSYL
KGAPVGGHILSYLL
AKVKQRIEY
KGAPVGGHIL
KAPSDLYNIIL
HQVIVARF
SKTRGIEW
KKFGWVKKY
RGAFGEVQL
IEQLRSQL
KALYISSRW
AKMKNKQL
AKKVYEEVL
SQKQYVIKH
SQKENLLTH
QKYGGKPYTY
KGFEFVYN
KGPDPSSPAFRI
PSSPAFRI
KGSIAGLSMVL
AKKGPNPLM
SKFVEEQNL
GKEDVIWEL
FQSPHGKDL
KGGKKPWFL
AKLTAILSH
SKAEEQFKF
AKVHSVAW
GKYDSSREA
GKKDVAQIF
WPFLIDKRW
AQRPRNAQL
GQRQVFFEL
SGGHPLEFL
IFHEGMKYW
KGVREVERALQL
GVREVERAL
KGHREIARYLL
GKRKSDAEF
KGAEQIGFEL
KGNSTLKGLRL
RAPSRDEGSLLL
RGAFGHLRL
RGAQPAPLL
IKPDGLLEF
EQFVVKAF
GKQENIRVM
AKKRKVLEF
SAIIHTSM
GKTIKSISY
RGAQFLTEL
SKYQTVEKL
YLFIPSKF
RGWQGLDEVVRL
YKVENKPAL
AKLVSEKL
HVSTHQHNY
AKLDSGRVL
KWLIKIKEW
SKHVAHVL
AKKEEEAYF
SKKNFEAII
SKTRSLVL
AQRFFAQKF
GQIERVTW
GKVVTKKF
WIRENISEW
SLRNYYEQW
GGYGGRSRY
GNFGGSRNM
GKELIDLVL
AKSLFSLVL
GKTTKLQL
YKIGLVEAL
VKFENLQEL
SGPRGMGTALKL
AQNISKTI
AQFLVEKA
KPPKKPFVKL
RGAHLTAQEML
SGVKKAIF
SSARHMVM
QKAKKYAM
ATPGLVSPAL
RGVQHPLRGLFL
KHFHNTLEHLRL
GKAEDTISI
SHAQTVVL
FQREFALRL
ALRPTDVVL
SQIQGHKEM
TQLVHVYL
SVLRGIGYY
HVYDRLARY
FKRGADPGM
AKQRLQQLF
FKRGADPGMPEP
FKRGADPGMP
TQRRKHLAY
KKRNSELSY
RGGALRTFL
SQLKNKEM
VQIEHISSL
SKAKAARL
AKSEKRTF
QKFSLPREY
GKVDRVARY
HGAVQNIAHLL
SQSKSLTL
GKLPALQTF
KGYTDIVKMLL
TDIVKMLL
SKSEVVRQY
HILWPPKRW
YVKVPRGHIW
IKRLEEPSL
GFMRGHGTY
QQLDNIRTM
AQRLSVAY
RMPSESAAQSL
KNLGESAALRSLLL
SGTIKAML
THFSDISAL
KVWGEVGRW
SQVKRLSA
RFFNPDSW
HKYFLPRAY
SQHVIHKY
HQAGRTLTM
SKIRNLLGL
KLGIEKEAVLL
SQALQHAL
RGYPLEDATHIAL
GQVKNKSF
GQYWPSIYH
SKRSSYPVM
AKALRLLAV
ASYNIPSF
EQFPRQVL
AKLQAQVR
GHYDRSKSL
TKAGVKATL
SALKRSEL
GKKDQVAQL
AQKSISQHY
RKRDQEEEM
AARDKEEIF
VQYKATSL
AKYYTRITM
SQLKQAVA
WTFHAKGLW
GKKLSLPA
RKLQKTYRM
SLLPIHPVM
AMRFPPKSY
RIKAIQLEY
SQRELDTVTL
SGFKVVAH
GKPPISVKF
GKSKSVEL
KLKDFSGGW
RLQIEREKLRL
TKRKEVIF
SMKEVDEQML
SMKEVDEQM
LQLDRISVY
QQYRALTV
AMFRRKAFL
RGASTPFQF
KPPNVLTDEMLL
TQALRVTL
KGLLPEELTPLIL
KYFDEHYEY
SSAPTARVF
SAPTARVF
SKQSEEISL
GQVVLRTL
SQLYPEVSL
GLRPLMLSW
AKLRGALSW
PVLPRLDPE
YLLKNKAQF
SVKEQEMKW
AKQNERKEL
VKKGFEFTL
GKHQYPHRH
ILRTPLENLVL
AQRVSHEL
HKQEKHLVF
RGVLHQVM
VKNDDIRIL
TKRKVDWLT
VKRDELTL
GVLKEKPLW
IPATLIADSM
AKHHGIPF
AKHHGIPFY
GKYKNSEITF
GKFSKSRGVGVF
GKFSKSRGVG
GKLINAIEL
VWLVKVPKY
SQEQRIAM
AQKISALL
AKMMDPRVL
EQFQNIMKM
RKMIQHAVF
SQSQMAKL
SQVMKTRL
HKAEVEAIM
FLRKAFKHKF
GKHWSKSVM
NKPDFHLAM
SQLRKPAL
TETVRSIL
GKRTIEVSI
AAFAYTVKY
GKLIFPREF
SKFDEQRTA
SKKRQWAL
LTYENVERW
SVFGMQARY
GKTTILKKF
KQKERELRL
SLRGLNPPH
GQHEEFYRY
EQVRRHYM
KLEKNLTATLVL
AKHLQDLLM
SARGMDASL
GKYTADGKEVL
TQREFMLSF
SKYDATKQKRK
RIMKKTSLY
IILEHVSAW
SKLDFLRPY
QGYIGAALVL
GVFQRLQDW
AKLEKAKAK
TQLLKLAH
KKVAPAPAV
AQLVVIAH
AKKVVNPLF
SKRRREEGF
SQFGHFRL
AKLPSGKLQAH
SQRLGSQKF
TVIEKTESW
ALLGQALKW
GKLERTLTV
LLRQTDPMI
GKPEPKVVY
SQKDFKVVL
IPPEIIMKGL
KLPAVVTADLRL
KKRETEAKM
GQRPTQPVY
SKQPPPPAA
RLMLNPQHVQL
SQRDYTQYY
GQAMPGPPL
HVYEIARV
YLHGLRNLW
SKLQTRKM
SQTVKKVIEINP
SQTVKKVIEINPYL
SKLLANMVY
AFWQRYPNPY
GKAAIVEKL
LKADEDPIM
SKEKDRQVL
RAPGGASVQNAMLL
KVSDLTHLY
LLKVPVSELLL
YKRDKEELY
KLNIDKVIMKL
SGFPRRAF
SQVDRLVAL
SKMDIPNTF
AFRALQHSY
TVYPDPRGAHW
TQLVLNKL
AKASGATVL
RQRETEAAL
TPKAPSGW
TKRPPALMY
YKTKRPPAL
FKYNKPVF
KLKNVIAQW
SQSIKNEL
TQFLPRIVTL
SQLGIFISK
TQFLPRIV
GKKYGPKGY
QQVVRVAL
AKAEAIRIL
KIKEYIQKY
YKVPHPLEH
KMFHPNVY
SKMFHPNVY
AMIPPPPSL
FKKYLQETY
GKRLQQELM
GRVGQDPVM
NGQFKTYAI
GQFKTYAI
AKDHASIQM
AKADGIVSK
IGAKDHASIQM
RKIEEIKDF
PRKIEEIKDFLLT
RKIPGVPIM
AKLDLVQSM
RAASTARHLYL
GQRDLDRIA
QQEFVRAL
SQSPWRLSF
TFMDHVLRY
AKMFSKAF
AKKAKPAML
AMFSSEVQF
LTLDGVKSW
AKSGASLKL
SKFGFAIGSQTTK
GFSDNQKLW
SKFGFAIGS
SKPKEPVPTL
KNIEIKKLVYVYL
GQVVIIHM
SKYAKKIFL
IEIKKLVY
KGHTDNVKALLL
KPPAAGSAALDL
GKIDDTLAL
SQRALYIRY
KLYGDFLSW
TQQLVVRL
IPALPRLQI
YKNAGVIEL
AKYHGFGNVHAY
AKYHGFGNVH
KLGEFAKVLEL
VKSEIIPMF
VKAELRQYF
NQHVKSAL
TKTDLVPAF
QQVAVSRL
SQGPISKPK
IGPKGSTLKALEL
SKFKAARL
GKWDHVRQL
WIRRTIPW
AQANVIGPW
KLDIAAVRALNL
MGPAGAKTLESVVL
GQRQVGVGY
SQLKGVSTF
IAAVRALNL
AQLDAVVSF
AKQKALEL
SKVKQVPF
RGGNNSFTHEALTL
HQRPYVVTF
SKIRAPTTM
SQMATILNL
AKLSFLVTL
SKAEENLLL
SQITKIPIL
GSRDGSMGLW
AQRFLEEKL
AKFDPDHYL
GKFLTVVPF
SKKATPVF
KGAGGQHVNTTD
GGFKKVEDLAL
KVADISLAAW
RKFYKGKKY
SQLRVAKV
SKLSKIRVV
RKSIARVL
TGSYIANRV
TVKSILAEY
KGAKIQLL
QKKGILVQM
SSTTVKVF
QKLAGVTAL
MMYEKPERW
SVFEKYFQF
SHREPPLEL
KKDRVTVVF
QGPGIPELL
SKLPSLAL
HGGNGFLKF
ILFEHFRSW
MGPVRLGTLL
VMTHALQW
KIWKKNTPFL
IWKKNTPFL
HGFSPLHW
SMADVKFSF
SQAVKFAL
TQVRAMMY
VKPEKHLRF
AKKEDLISA
SKPEPVLSF
YFYKGGLVW
FQITQVVR
GKMQPPGKLAAL
GKMQPPGKL
NAYHPMEW
IQFEIAHAY
AKVYTGEMGRL
AQRIFDLGL
SKFQVTDSAVF
SQAHSIAF
RLKDKDPEF
KVFDAIMNF
AKFAAKGEGQL
YLAEKYEW
AKNPADLPK
GKKLPRTF
KKSDPVVSY
KLIEKLDIKL
VKTGTITTF
RGVRFDVHDVTL
SVVAGFQW
GKKEDLYL
AKHEAQRL
AKLKAEAL
KVRELELLY
VKKVRELEL
KGYLENEYMKL
RLAKVNQW
WKREEELAF
RVFDHKQGTYGGY
RVFDHKQGTYG
YLRRILHTY
QQMENRPSV
AQSAPKVVL
TSSSFDGIIAM
SSFDGIIAM
AKFIMNRL
TKRGRDLGA
GQLVGMAVR
AKVIPSPF
AKIKWVISV
VAVVPSKW
AKVAGKKAY
TGFSFNTK
AQQIQKVVM
QQIQKVVM
AQQIQKVV
RGIDVQQVSL
YKKGKDSLY
KKRKGQVIQF
AKTTKKIVL
QQIQKVIL
RGGNSQFLL
GGPKQQSEEDLLL
KGGPKQQSEEDLLL
YKNVKFVL
AKSSALFF
AQRYNELSY
IQPRVISF
SKLYNNITF
GKTSLLMVY
AQRQKQHRL
AKSVGPLQY
SAHLMVAGW
VVRNITYKY
RGGQAGPRGLAL
GQREKSFQP
AGPRGLALL
QKREHERQL
SQRERTLVP
VKLEHAKSV
TLKNPILW
AQQAIKRTAH
KGPNGYGFHL
KGPNGYGFNL
KLQLQEALLHL
AKFPTATL
AKFKKEVAQ
SQFGTVTRF
AKFKKEVA
VVRRHQFRW
HQAVKIVF
HGPPEPVLL
SQLKHIEA
RGAPSPLIFL
DPPRPTFDSL
SVYKAFVM
YKAFVMETF
QQVQRLPFL
GLFAPLKL
DKKGAQIIKEVL
KGAQIIKEVL
AQIIKEVL
KGAQIIKEVLL
AQIIKEVLL
VGPPSPLKM
AKKKQDLYM
VAGSAESAALRL
SSMARAAF
GKRLSTPSA
KGGIFSAEF
MQNVLLQM
AKFRISLGL
AKNLYIISV
AKNLYIIS
KSYRRKDGVFL
AQAISRFAY
AKQEAERAM
ASYVLPEV
SKKDFISVL
IQSIRMGM
RGAPNPWLL
SKEEAMRWF
AKHRISKEEAM
AMRWFQQKY
QKYDGIILP
AVRAALEAW
KVRKWEKKW
SFNQSLAEW
GKSESTAFL
RGGTPAYL
GKRPAEDMEEEQAF
TQTTIKLF
GKYVLGYKQTL
KLREIFGLY
YKKSGKLVF
SKVELNALM
QQVSRIAAY
FMRQAQLAQW
TVMKFVPRY
GSFRAPYL
YVKEQFAW
NQYVNKKF
FQSLGVAF
TKVAYSPQF
KKAATKVAY
EQAAKAVL
LGPKSMMKMLL
ITTKVISRW
KAMTGVEQW
STIRLLTSL
TKRESGRKV
GQYPTQPTY
TQRKGNFF
AAFPGASLY
AQTKQQLL
SQMLHPIF
RVFERVANI
GQRKPATSY
GKGVVVVM
GQEKLRPL
KGGFPERTL
AKLPFTPLSY
LPFTPLSY
DEEGSKIVKDLM
AKWNPTAGVAF
AKKGFGKEH
TVYPKPEEW
AKYDLEARQAM
RQIIKEAF
SKWDPVVL
SKKTVELPL
ITYQHIDRW
AQILLKAL
FQNKKRVLL
RILSGVVTKM
GKIERAIGL
SKIQVNKPAVL
KGARSLETVYL
TKIEGLQSL
KIDRHMYHSLYL
SKKIDRHM
QKRLASSVL
LKVKGNVF
RKKTATAVA
ISKALVAYY
SKALVAYY
TQSGGVRPF
TKHIGLVY
GKLVQIEY
VQRVASVM
SAFQHLGW
YKVEYPTM
SKLGHVVM
AQLKQLQA
IHIPINNIIVGG
SKMNPLWNTM
FQYLKQVL
SKLLSNMM
FQHGVIVAV
SLRSPELAL
SQFGGGSQY
RGAVIATEL
AKTQGNVF
KQFGVRQKW
GQLVVRLF
QARTPAQW
SKKNEIMVA
SKYMPSVKVAVF
GKTAVFVL
GQVSVLVM
KVFESIGKF
VNITLRILF
AGHRAVIF
SKIETEMKNKM
YGVLRFIM
GQRAKSMKF
SGKLRGQRAKSMKF
GKIGPKKPLP
AQAESLRY
YKLLGGLAV
SQVRQMLF
SKAEEAKKL
QKFGGVIEL
AAPDPPPLF
RGPPLPRDL
KINNHTHIW
GKNPDEVSY
EDWRKKKEL
AKVDLAKRTL
SKLGWIYEF
GKNLVDFTF
ALKGVSTVF
RGAPGGLLVL
AKALRMLPT
LGPKGMDKILL
FQVKRQVLL
TKAARQALL
FQVKRQVL
SKFIKFQEM
AQHITYVH
KQPAVPESL
FKYGNQLVQL
TQRPADVIF
AKAGILTTL
VFKEKNHSW
KVFKEKNHSW
EQHVRLIY
SKMNKDAQM
MKRTLNAVF
KVQDSTMQW
SQAKKIKM
FQDLREVM
GQMGSFIRL
RGGVLAHLERL
AKMISAVVW
KLTELLRYY
IPPAPTKPDF
AKADRMTRSH
SKDRNFHVF
AKFESLFRTY
HLSSLQLFY
WIPDGRGRW
MLGKLKDLGNLVL
FQKDRSVLF
TQKSKPVF
SQFILNRL
KQRAHVIVM
AQIKEMVEL
SKMADLLSY
NSFVAIKI
YKRKQEEEL
FKKEGKIY
AQTVGNTY
YKNDVMIRK
QQFHNAKF
AKVNKAVW
KGAYIYNTL
SQIAKIVAA
SQIAKIVA
KKKDFDTAL
AQAAKFPAH
HLNVTRKW
AKFPAHRRL
SKFDSERSISF
SKFDSERSISFI
AHVSGRVVM
SKFDSERSI
SKQAGQSVF
SQLIQREF
KGPVAGWINAL
GKYREFHRL
TVKPMDLHLY
GLFAHHSLW
SIRAKDAAF
QQTKPLTL
AKMETQSMY
SFMEEIQGY
SLQEGHRLW
IWKEENGTW
SQDGRVFVW
KGFDQTINLIL
MQFGQLLTH
QLYETIQRW
GKIDTMKKF
AILKKVIQW
QVRKENQW
AKREGPPFI
KLYSPSQIGAFVL
KGAVVGIDL
GKYWAIKL
AQTTRTAY
GKHVPRAVF
AKRAFVHWY
GKEIIDLVL
EKYGDKMLRM
FQRTTYKY
YQDAIRVF
AKVSGGPSL
RVFANILLY
GKTVIRVL
GKRPFGVSL
TKRKYESVL
GRALTAHLY
RKYESVLQL
QQSEVTRIL
SEFKRQQL
MSVAEVEKW
NQIRKTSY
RQIRKKMM
AKGIRNVPY
SKHRAQVIYTR
SKHRAQVIY
SKHRAQVI
SKHRAQVIYT
KGPVREGDVLTL
KGPVREGDVL
TQVRVEFM
KGPVREGDVLT
KGPVREGD
KGPVREGDVLTLL
AIFKISGL
SGMVRAKF
NQREHTALL
AKFRSNLPA
GKLFMAQAL
AKKDAPPMEKP
AKKDAPPM
GRVDNLAVVM
ALRERLHRW
TQAPVSVSL
PRHASASTY
APPQIPDTRREL
AKAEKPSPL
KLFSQNSGGHW
QQQIVRVL
AQYIRSEL
AKPEPPVNF
NQRSMTAQF
GKVEAEHVL
AQVDVHTGL
AQLLRSLL
GSYEAQLL
SKDGSVRVW
AKYRAQLL
KGANIQLLDL
YVFERFPTY
AKSLLVVHF
GQFEELLRL
AKEHQQVSF
WMRKLAFRY
SFRIPGAW
QSFLRAIL
SQLRQILL
SQDDVLYAL
SVNPGMARW
AKKLPIQEF
GMFYRTIRM
YFHPLLRNW
VKLEQPEAL
YLSDEGHYW
AKAKKFYL
AMYSRKALY
AMYSRKAL
QGYLRSVF
AKHYHKEY
RKARRKLIY
GKRFKEANNFL
HGAPINSLL
HGAPINSLLL
SLMAPVGRW
SNFGYNIPL
AKVEVNIPR
RMFAPTKTWR
RMFAPTKTW
ASALPALVM
YKKTKEAVL
GRMFAPTKTW
SLKGVDPKF
VKPKEIKPKM
AQAPTKAPE
MQANNAKAM
IKKPRSQRY
RGYQGDPSSALLEL
RGYQGDPSSALL
TKRPLEVVV
QSRRPSSW
SQIPHIVV
DFNSELLRL
SQPFPSLQL
RGPGTSFEFAL
RGPGTSFEF
GQFKDISL
SKYDSNVSGHSSF
AQSARIIY
GMIKDLGATW
GKFEARFF
GKFEARFFHL
SKDNTAKLF
GKFEARFFH
AKDPIVNVW
AKLFDSTTL
SKITSAVW
TKYDAAHFL
TKKPRELVL
AQYESKKAKKPAL
SKKAKKPAL
KKAKKPAL
AKRLREERL
AKKPALVA
SKKETKYSL
SQINKAYQF
SMAGVVKSM
QSPQGRVM
AIFKAFAM
SQSPQGRVM
AQYLINARL
GQHTISPL
LMNVDPDSVVL
MWRRPEEW
VQRNVNVF
QVNSDLLGW
RKKGPAPKM
VKYKAIVF
GKYGFVIAV
YIRSETYKY
STILHLVV
KLLDAYLLY
GKLPRSPSF
SQRFPLPSM
SKKDDGISF
RQPKHLLAFLL
QQKQIENVL
AKAVDIPHM
GKFPSLLTH
YGMPRQIL
AKFSATPRYMTY
AKFSATPRYM
AKFSATPRY
AVNKVIKSY
AKLLHTDSY
SKAKPSVL
GKHKERIGH
GKITGEAF
GKTALVVRF
FANAHLLGW
EFNPRIGKW
AQQEDRKRL
KMFKMSEKILLL
KMFKMSEKIL
YIQKNVQLY
RSRTPYHVNL
SPFHPVTHW
AQAGARRVY
KALFKPGAW
RVRDDIAEY
ALFKPGAW
AQRFYNLVL
VQEVSRLL
RGVAASFRFKHLFL
YQIIKNRL
AKAAAHPGL
VVSEEKSLMFI
AKREQDVLF
SKQKLVPIM
KGGNLRDKL
SKAPAPVTY
QQQQKIIAL
LGALPNIEL
AKKLYDSAF
QMFALGNHW
AKLKQTLSL
KVLKKVSKY
SKFKTKSL
KGYGLGSGISL
AKHKGPPVF
GKNYPIMNL
KMVQAIKW
SQEYKIVL
KGLQDFDTLL
KGLQDFDTLLL
VGAREAILAL
SKNLLLVAL
AKALRSLQF
GKYKFLQKY
GKRPDYAPM
KRFEPGTQRF
AQDMRVTL
AKNSQPNRY
SKVKTASKL
GKWERKKFM
RGGIVDEGALL
TKKEKDQAW
SQIKGYVW
SGIQRAIW
AQKNHIPVL
AKIGAFLGY
AKAYPPTSL
FKVEPAQGY
RNSVAPAALFL
FPPLPTMAQL
AKSSSINF
GQLSSPLHF
GSYRSVEL
RKRGFEVVYM
RKRGFEVVY
AKSGTKAFM
KLSELLRYY
RMKENQKHIY
GQLEFRAL
SQFIGYPITL
FQAEIAQLM
FQAEIAQL
RKHGLEVIY
IQARMGVF
SVLERSESW
GKVEAHKL
LQEVKSVL
KGFEMSSTRDLLI
SKRNPRQINW
AQREQAIRA
KIYPGHGRRY
SKKTAMAAA
AKQKKEKVW
AKFFTESRLL
AKFFTESRL
SKRQTFALF
IKERSAVF
AKREAQDLM
GKRPSEPTL
GREFSGRAL
FQYKEDHPF
HAMKQAVM
VKPGQVKVF
KGYADIVQLLL
KGYADIVQLL
KGYADIVQL
SKAEEVVSF
FIFQKVGKL
GVDKRTQFW
KGAWSNVL
RGMGGAFVL
AQLAMSHL
GKNQAFIEM
TKRGSDELF
SKHQSVQL
AQLNPQERL
AHFRNMSL
TKFAATVRL
SKYYTPVL
ALRQMQVLY
AQFAQLAQL
TVMKDVPGW
SVFHTTRW
GKFMKSQGL
SQFGEMGGKFM
AQFAARAIISEL
AQFAARAII
GKLDLIHESIL
ALFQVNQW
KTFMPIAW
TKHSKEMSF
SGFKRHVI
HKMYQKMVF
HGATGILVF
FSKESDDPM
KAYGDRIERMLRL
YLLPDTKAY
KFKDLPQMW
AKISKPAPY
SQFTHLAW
IHLRAEDALFF
HLRAEDALFF
LRAEDALFF
RAEDALFF
KWTNYIHGW
NPPVLSHEFVL
SKFNESGQL
HQFEKIEQF
IQFALRTL
EKRFKDPGL
SQIKKVRL
AKHKPVAF
SQMKHLTV
SKVPAFVRM
KLVTIKFKW
GQYTHKIY
SKYPAASSVF
GFFFSHVGW
GKLEKTPLYL
FFFSHVGW
GKLEKTPLY
IKRTGEESY
AQRLPGITL
AQLQKTSL
AKIPSIIEY
QWIEGQAW
SMDKTVRLW
KIHISKKW
AKFKFPGRQK
GQVIMSIR
VHIGQVIM
KGPLVLQQAYL
VFIKYLPEW
SHLDKASVM
TMNIKSATW
TVFQPTQM
SVMRLTISY
IQHDLIFSL
FKLELVEKL
IGSAIKDNPAFITL
DDVSLTHLSFSPEY
MQNVLIQM
RGLDVQQVSL
KSILAKAI
QQIQKVVL
SKDEHKKLY
EIKERLAALAL
SGWEGRTL
AQFEHTILI
SKVDRVSL
GAGYDIVK
NKMASSIF
LQFPVGRVH
AGLQFPVGR
VGAGAPVYL
YPPELKLRFL
SQARALVF
KGAGGEDLIML
IQGLRAVF
THILNFAL
KGAGGEDLIM
SQEAKSVF
RIFGSNKW
KKRTLNPEF
HVAKALLW
TMRPEEIEL
AQIVHLLL
AAILRAIL
QQRPVLPSL
TKRFKRPQF
GQLAHVSNW
SAAKSWVF
IGVKFRSDLFKL
RGPGVLKVLWL
RLKVALEPQLWEL
AKGPGRLLY
GKWPQVLFF
SIYRVPLL
SKLEAELRKL
TKLSKALAL
VMYKQLSAW
GGFGNVIRW
SGPTIQDYL
SQHGLLMQL
KWVPGLSQW
SGFGHSRL
SAYRSNQW
AKKYIVPAL
SKAKIRAAH
AKKISTPSF
AKVWKIAL
SHHSMVSM
AWRTATEEW
SKSTSAPQM
LPPGVPPLL
TQYDIHLVH
AKFKSSIY
GKTAAFVL
SAHLHVKF
RGPGRIDLL
SFNNVKQW
KKRGFGFVY
AQHLFLQTF
HLQKLVHHW
HGPPGVASASQLLL
SKFPGVWAH
YFSKFPGVW
GQNPSIPVY
SGPYASHSSLLL
VFLDASGRW
RKRERERKM
SKRDSLEEGEL
AMFDQSQIQEF
GKNPTDEYL
PQRATSNVF
GQWKKGFVL
SLKDPGPNF
HGFTQLQTLIL
GAEIRHVL
EELVRMVL
MRYVASYLL
MRYVASYL
RGDYDLNAVRL
VHRQVAIVF
YDLNAVRL
SQRPPDPAP
VQKEDIEVY
KKRDLEQAI
QQRLQSLYF
QGALLMHFL
GQGPRPAAM
TKVTAPLIF
RGPNMDGSVDML
AKIEDLFSF
HGPPPMDQYL
[truncated: 4,903 more rows]

## Sheet: 641_A18
NQHLHTVTL
SQKPGSPPSIVL
KQKNVSEEL
VQVYPDGIRHI
SMLQKTWLL
SQKTMDDLSL
KQAPKWYQL
KQKELAHMQAL
KQYPDSREI
GLDPKDIVAVL
RQNVLTEFERL
AILQKEPDITL
LQKEPDITL
RQKVIQKSQL
KQKYPHLQVI
QQWTRSFPHL
KQFQEKVAEL
RLDESQKVLL
RIQTKEPLPTL
KQVKKSVFDEEL
KQAHRMHILL
RQAPVTRVL
ALRAAPDILI
KEERKKEKI
SQLKKKRAATTL
AQISKEMRDEL
AQKQLEVVHTL
RQISHTEMEHEV
RLYEWTTEKEL
RLYDGLFKVI
RQHLQEVGL
GMYGKIAVMEL
ALYLKTKGDFIL
FELLHKEML
LFKVIPLD
RQVLHGEAL
KLFPKLQRL
RQINLNDLAKQL
SQWLKTVTL
AQMYREKIRQL
KQGVKSVAGKMAVL
KLFDRNSLPIPVL
RLQVKVTQL
QLLEKLQPSL
KQKLQYEGIFI
AQVRKEYEML
AQLQVVRKL
SLHKKLRTEVI
KLQEKVELL
AQVRKEYE
IMKLPLPESL
RLRFTTDVQL
SQRDPPHNNF
ALKRTTPDYFL
AQYDRQIRL
AQKRLRASQVLL
RLRASQVLL
KTLEKIRPVL
RQAEIRKECL
KQKKRVAEL
RLKEASGWQL
QQISRHQEQFI
QQNPALLPAL
RQVIQQNPAL
KQRPKDFWDIL
EVKEYSSLDEL
RSQLKYTQL
SQQQKEQLERL
LQKDMGSVAL
RLIKHAVQERL
VQFHAFGRVL
RQLQKDLESI
RQKPKEFRL
RIMLKGDNITLL
LKGDNITLL
SQKTPPSMRL
KQAKKVATL
RQVSKERGEKL
ILKHTGPGLL
SQIIPFRTL
RQQEKKEKKL
RQQEKKEKKLL
EQVKKAVEALL
QVKKAVEAL
KEKYKLLVEGDNL
KMKESVLML
YLKRPGLTYL
KMASKSIATTL
LIFQHITLL
AQLQRVHGFL
LLFLHIQQL
SLFLKSNFEYL
LQKLVDIIQI
KQRHSYPERL
SQIHRELVKL
HQREVTKILL
KQLALRDALL
QLVPKRDHALL
RQKEQDVDKEL
SQLPPLREIIL
RQMKQKVQSL
AQLSLIRDI
EQAPKSRQELI
KQMEDVLKAL
KQMEDVLK
FQRKAFGTIL
RLQEKTSKLPDM
GQIQEGKKVL
RQKLKEHLL
AEKKAKKPAL
AQIGRADALQVL
SLIRLHFIPRL
RLWGKLQTQGL
IQKEVATSL
VTLEKLPPVL
ELRWPPEEFL
ALKQKIREQL
ALMPKETQAL
KQRILHTLL
AMYVRQTVL
VVLDKGTLDAVL
SQRPNLTVGSF
RQRKLQEYL
SQANKLIKEEL
IQVDKAYDYL
KQKSTLVDAL
KQKSTLVD
ALLGKKKSSNL
KQKSVLLEL
IEVDPDTKEML
KLLDFGSLSNL
IQRGPVRGISI
AQKLLSEALEL
AQKLLSEAL
KQFAAIQKEQL
EQFERLMTVYL
IQRIFLITL
RQQIRFQPSL
KLMEKGIEVM
KQQLKESQSEL
AQVERLRAEL
LQRHRQEAERL
VQKGSELVAL
RLREKAGQL
GQLQRGLFVI
QQYKERIRNAEL
RQKEGPIVI
IQVRLVREL
RQQQRTEAL
SLYKKNIQRL
KQLEKLFSFL
KQLEKLFS
SQFREPLQQWL
KIQMKMEKL
RLKRTVVEQL
AIKKAWDDL
GQKLVVPGLL
REMEKGSPSL
AQKHRQQYEEM
ALLRRGLELL
KTMLHLTDIQL
AQLQRLGVLHV
AQLQRLGVL
IIYGKQVIINL
KLKAKEWDEFL
AQKLWVDRI
AQKLWVDRISL
RLRILPGTEQEML
AQFRKHIDL
RPFEKSRLDQEL
RLFEGNALLRRL
RLFEGNALL
RQHQRNVKL
KQRPERVSHL
IQKNPYSHKENL
AQMAALQAKAL
AILMKTAEENL
KITEKTIPTL
AVLPKDKLVSL
RQADKHKVPRI
KQKENNEAERL
KQHKKYRSVI
KMKRAEESIL
KIMGKGQIQL
HQGEKKLEEML
KQKLPVGTDPEFNL
IQAQRLDTLL
SQRYPDIRI
AQNKRQQVVL
TVQEKLFDEVL
AQRPSGTII
AQQEKRVSSAYL
KQMESFLKANIL
KQKELEAKVL
SQKLSPLQKL
RLKESGAINTSL
RQREGKLYL
RWSLLEALPEGAA
RWSLLEALPEGAAP
RWSLLEALPEG
MQLLHINAQL
GLLLKIEPLL
EQKSLYREVML
RIAGKEGPGL
RLRAPGALL
KEKKKAKSEL
RLAEIESTQAQL
AQKSRIQDEL
RQKMGNEGIWL
TQISREQVPSL
ALKKADVVVL
RLHRGEARYL
RLAAKEGLL
RQRLAAKEGLL
ILFPLDTIKTRL
GQFFKEAIEEL
KMQKPKKIGL
VQRDRVDEEAL
KQAESERPIL
QEKSKVGKL
RMNKKNEDLL
KSNMKLWTEIL
KEKENSKQAAL
ALFQKKILQAL
GQVVKVVVL
VQKVTPLGLTL
YQRELLETL
KQHTFRVNL
RLNPVNTTLL
ALRQCLPDQL
KQLYLERVL
SLYRKTVDSF
SLYRKTVDSFYEML
KQAVKVPFAL
LQKFIPEITI
RQAGHRIGEYL
ALRAFNVEL
RMHDIVKEF
AVMAKGFDIL
RLFEFAGYNVL
KLKEKERDKVL
KLKEYEAAVEQL
RQRDKLIGQL
AIFEKSVKTLL
AQRYVNTLL
SLQHKKPPWL
RGYFHEEATL
RQRVPFSVF
KFQLKTIETLL
KQYLPHVARL
MQLGGRVLLVL
MQLGGRVLL
SMMKKDALTL
LLREQVAQL
RMQDPKSVDL
FAYLKDGDVML
RMMKRVQNLL
RMMKRVQNL
AQAKKHNLTVNL
KVYKKLGQTHL
LQKDVALSVL
REMGKGYLAL
IGRAYFEL
AFARKQAQEQL
AQRPLPDRDSL
AQLMKEDPEL
KQYRHINNFQL
KQYRHINNF
KLKEMSQLML
KQIIKPFIL
RQTQKADTLHL
RQRQTQKADTL
RQTQKADTL
AQRHVALRVQL
AQREAYSKLL
RQQLYNLETLL
GQRQTLWTLL
TQKNLDIGVL
VQQRRQELEQVL
QQRRQELEQVL
KQQLKDQYFL
AQIEPPHHEL
GQMYPVPAKHL
RQQLKVISDLL
LLIEKVDSEIL
RQRFFTDNVPAL
KQFSKDVVDLL
TELLKSLPYL
AQVKRFTQDLL
HLNVVPPVCL
SQRPTVAEL
GLNQKSILDMI
AQDLDLRIKNI
MMKENGEESL
TQLSMRNFEL
KILDKTRISIL
AQKFPEGLI
FLFQKVGKL
KQLYKRELL
RQRAALDGGPRAL
AQKAVGKDNFTL
KQQAPPVRNL
AQKAVGKDNF
QQAPPVRNL
KVMSKSAAEVI
AQKINVPAF
SLYERGMESL
RQKQIQEDWEL
RQKQIQEDW
RQKQIQED
HQSLKHISEML
KLRDMPDGTFL
RMKEVGKVFL
RQVDTKTGKL
GQKYLTRVVKL
RLMELHFKYL
SQKVLGQGKWNL
YQYLRQLEVL
ALQARHGEAVL
KQIESKYAFQEAL
KQIESKYAFQE
KLKQYIEKL
ALRDLIKSSL
SLWNRMPDQI
KEKEKASWSSL
AAPFFIVRHQLLKK
FIVRHQLLKK
SQKRNPQTHL
QALLKDSIVQL
VQKHNIQALL
LPSEFDLSAFLR
LEQPRIVKWDRDL
IQRPPKIQVY
PRIVKWDRDL
QPRIVKWDRDL
IQRPPKIQVYS
KLLSHSLLVTL
LLSHSLLVTL
GQDDRPKVGL
YQQDLDRELFKL
PKFEVVEKPQS
VSLGFATFYK
RSFEGRELLVL
KILDKQKVVKL
KQMKSEAANL
RQAVITKEL
AQLKEKNQWQL
DWVPYINGKFKKDD
SQFQKEYSL
AQHDVAVDLQPL
AQHDVAVDL
RQAGKSGSYL
RQAGKSGSYLI
AQREKFARRVVL
ALKPKGVLL
YIYDKDIEII
SVYIKGFPTDAAL
ILFNKEMIESM
AQIQGAKEVL
FQKDVLNLVYL
KQFDVDRSGTI
RQFRRLFAQL
RLNEHLYNMI
KLLSKKAQAQPVM
RQKEQEHMI
KLNEQKIAQL
AQIHSKPPREQL
QIHSKPPREQL
SHMENYKKRE
EQIRRDYTSGAML
AQGELVRDL
GELKKELIEVL
LLQDFFNGKEL
GVFQHGKVEII
KMKEIAEAYL
KMKEIAEAY
RQATKDAGTI
FQHGKVEII
KMKEIAEA
RQATKDAGTIAGL
LMKDLADEVAL
TLKDQLIQNL
AQILRDVGGIVL
TQIEWFRAGSAL
QMYQKTLGTMI
AQRLYQAGEGRL
RLYQAGEGRL
YQKTLGTMI
KLREVLYEL
VQAFKTSLPSL
RQKEVNENF
IMKSIIPVVM
VQAQPQIATL
YQKEVSHLSAL
GQQVKVVSQLL
GQQVKVVSQL
RQAMRQGLL
VQHSIITDL
RMRKRDPGSAPSL
TLKVPGFPLL
AQARKLVEQL
RQMRPVSRAL
AQIEKRIQEII
ILRTPVSEDML
RQIYPPINVL
RLALTTAEFL
GQIYVDRQL
AMKAVVGEEAL
RLMQKKETNL
RLMQKKETNLCL
HQKQLERQQL
KQFETEVGKQL
KQFETEVGKQLI
REYHRFEKEKL
KQLSPQEVTL
KFDKGPFAK
KQQLFSYAIL
AQRLKFRLNL
HLFETISQAML
SAKEQIKWSLL
KEQIKWSLL
KQISRDYGVLL
SQKAMDDTFYL
MQLLRAGLTL
RLRRLALFPGL
IQQHKDQYNLL
KQQENVTLLL
SVFKKEAEL
AQRQQIKAAYL
QEKGKPLDEVL
RQQIKAAYL
ALLGHLEEVVL
KLADFGLARAF
YQATIDGVRFL
KMLDEILLQL
AQHFGSGAML
VILKKERSLNL
TLFPKDVQL
KQLPLVKPYL
SLFKSLSRYL
GQLNKYESL
KIKDLSTIEPL
RINHKMDPLI
KQKALNAGYIL
RVFRLLGVETL
AQKLEQFVSL
AQKLEQFVSLL
RLLGVETL
VVVQKQMAFML
AQYHAKDPNNL
VQKQMAFML
VVVQKQMAF
FMLGRHGVFL
RVFDKEGNGTVM
RVFDKEGNGTVMG
GQNPTNAEVL
QVYRKKYVIYI
QVYRKKYVI
QQIGKVVQV
KEKGKYKEETI
AQKKVERQTEL
RLKDLFGKF
RAIEKMNGMLL
KFMKPGKVVL
KIKRHTPLSKL
RQYAKDIGFIKLD
RQYAKDIGFIKL
RQYAKDIGF
RQYAKDIGFI
GLIRKYGLNM
AKDIGFIKL
RQYAKDIG
LQKMHNVDIVL
RQRTKYQSVL
AQLRRYNQL
RQYKLKKDL
RLQRKAAVSL
RQYLQQRHSAL
KQKKNSSVSL
YQAKKRAVVVI
AQRAKYLMIL
ALRRAAVML
RQKVLNWLL
KMHNVDIVL
AQRAKYLMI
RVVGKEQGQNL
AQIKAHVASL
VMVDGKPVNL
QIFVKTLTGKTITL
IQKESTLHLVL
IQKESTLHLVLRL
IQKESTLHL
TNNLRPKKKVK
KQLEDGRTL
IQKESTLHLV
GHTNNLRPKKKVK
VKTLTGKTITL
ESTLHLVL
SQAESKVFYL
GQKYFDSGDYNM
KQLPSAGPDKNL
GQKPGGSDFL
LLIRKLPFQRL
TIMPKDIQL
TIMPKDIQ
YQKSTELLI
HRYRPGTVAL
HVYSKRLEIML
ALKPPHVIL
KAFYKGTVPRL
LQKALEDAFL
SQRDENGEL
AQRQQIRQTF
RQMEKDETV
QQIEKNLSDLI
KNLSDLIDLV
AQKINEGLEHL
MQKLPEAVQL
KQFEQAKDA
KQFEQAKD
LSSFIDPKKQPAT
AQKGAYIELTL
AQKGAYIEL
RERQEREQL
AVRAVFGAL
KEKRRQLEAL
MQKIFHDLDML
AQRGLWNVF
SQYQHFTYL
SQFLHEVDVEDVLP
AQIGPPDVHL
RQADCHINNL
LMYRKGTVL
AQMREVRAQL
RQYGKVLIPVHL
VQLPAYLKRL
QQKDSLINL
AQQLPYLTSL
KMFAQQKVTL
AEYLKLEFI
ALLGPALKDAVL
ARALLGPALKDAV
RQFYQKTEIL
RQQVKQYLSTTL
RQYSGPKANM
RQQKIQGKVL
SQLKKLQETI
KQVDILGTVI
AQHQGRPFFL
KQLQRNAGL
RLAAHLGSAL
KQFDKNMEELDVI
KQFDKNMEEL
SIYSKNSD
HQAIKSLFPGL
AQRKILSAQAQL
YQLSKDGQQL
RQAEVTRLLL
RQAEVTRLL
ILRQTEVLL
FQFTRTATL
SQRANNGRFTL
AQALRDGVLL
AQDKKRNEL
IQKVNEMSAIL
KEMLDILVKHL
AQLDKMGFTIL
KLPEKNKEML
KIKAPLSKVRL
IQKEVMNGAIL
KLQQKRQKEEL
QQKRQKEEL
LQRAVERGQL
GQIDVLRLL
AQYGKLESL
KVFEHDSVEL
QQILHRNLVYL
IQKLQDKATVL
VVFDKSSEQIL
RVIKKKLYSSEQL
RLWPKIQGL
RQQPRHEYQL
AQYQASHPNL
RQQALRQEVL
RQQKLKQAKL
LQRAQVDALL
TQVTREAISL
IMIERGEIFL
RQIEKDLTLFL
RQIEKDLTL
EEYEKLASELL
SQNQKRLYIMTL
SQNQKRLYIMT
NQKRLYIMTL
KQFKKYIDNPKL
KLNLSQVRFL
QQVARTVAKVEL
RQRLQSNALL
TQKLIDLEHLL
RQKGSPDGYQL
TQKLIDLEHL
AEKRHREMEEQL
KLDAKSKIRALL
KLDAKSKIRAL
KLKETAENNL
IQKDRTFAVL
LQFLRLVGQL
RQFNITESRKPKL
KMRPFPGTQL
VQRGRDLEQIL
EIIKRTGIPTL
KLRHSAPGLL
TLRPPERQAL
IVHDLPAAVL
VWRIPAVL
RQAVHHYEAEL
QILQHLHAVQL
VSTVARPRRSRH
ALRQAQLTPLL
LQHLHAVQL
RQAQLTPLL
YQKQLRFAELL
TQRSVAESLL
RQKNSAVTRL
QMKEKRKDELL
KEKRKDELL
KQRKRTIVEEL
TQMKEKRKDELL
RQKTAGDGWF
KQKVSTPSDYTL
KQKVSTPSD
RQLLRFQEDLI
RLAPIGRRQL
RMKEFLDSL
IQIQTVGAL
LRFQEDLI
FSKPISWEELL
KQFEAEDFPSL
AQADRAFQQL
TLFRKLMMIL
TLFRKLMMI
RLKAAIQSQL
VQKNAKYICL
KLYDRSLESNPEQL
MLYGMKIANL
RLLLHLEELQM
RLLAPSRDIHL
TQKHGLGYSL
LQVEPEWRNEL
RLLLHLEE
RLLLHLEEL
RLRQLLPVL
RLRQLLPVLL
AQIRDARGAL
RLLDKATSQL
RLLDKATSQLL
IQNEKTELEAL
TQLRHSNLVQL
KLLKPSLALNL
RLKSVGIPVL
KLYQHYHFL
KQVERMQMI
IEKKKAVSF
GQMQDRRAIPVL
ALFRHEIGYVL
MQDRRAIPVL
QVDNKAKLEATL
GQMDSLLAQL
RQYDKLRKREAFL
RQYDKLRKREAF
AQLELENKEL
RLREHDAAAESL
KIQEKLAQL
AQQPQKEAAL
AQLWNKPLL
ALRDLIVATI
RQYKDVAKPVI
HQAPPPKAEL
KQRDMNEVL
HQHEHGYTAL
RQKTKDQNSQM
SQMLKHAVVNL
RQDDPSYRSF
AQRVRAAMFPETL
AQRVRAAMF
AIFKSGGIPAL
RLAEPSQML
IQRVAAGVL
AEPSQMLKHAVVNL
LKHAVVNL
AQKFIYESDVL
RQRSVGPSL
SLRIPVAVL
RTKDAGLGVYSL
RLKDSLVSSL
RQRPRESYQMGHM
RQRPRESYQM
VQIGVKKFMI
SLPKKLALL
AQKSAVPGDLL
RLFEAQGKPEL
RMPHPETKEMI
VQKYPSAEL
KQIRKQKPVL
QQRETLAQL
RLRDPDVNPCL
YLFDRNGVCL
RQWIRPLAVVL
RQLIDYERQL
RQSTKSGEEL
SQYAHYFDL
AMKETKGMISL
KQLLKEGNAF
VQRKPVAAL
RMAEVARLL
REKQKYEAL
KQKKAENSAI
RIKQKQSQL
KQKQSQLQELI
RQQWKQEGVASL
GQHGKAEEIL
AQYLKGLEVL
IQMKKDEKMNM
RLAYKDLEIQM
AQLYRERIKAL
AQHQLFDQIPEL
AQVMGRKYIRL
GQWVKAHEL
GSKMPFGQL
LLNDYRGFL
KQFDKAQDQLHNAL
AQYQEMEKKVNL
KAFEHLGNTL
KQFDKAQDQL
KQFDKAQD
GIYQKAFEHL
KQVARSLFLL
RIKTPIPTSL
RLKYQHTGAVL
GAFLHSQGTGQL
AQNIYRPSKNL
AQKEKEKHEEKL
KEKEKHEEKL
SQRSRQTSL
NIYRPSKNL
QGALDRVALGGLL
QQKKSGEVAVL
RQHQLDAARL
RQRVKDADGVL
AQREHEEYL
RMQDTSVSFGYQL
RQRWGMTVRF
SEYVKDIYAYL
AQLNSALVQDL
VQVQIKFRLL
VKDIYAYL
HQIEAVDGEEL
QQKDAEAEGL
GQWEKHRVPLL
IVFSKDQFPEV
TQYLIRIRKL
KLHSKITLL
ALFAPRDPIPYL
RERERKEEL
SVYNHVLEEVESL
KFYHKGIASL
QLIAKSQLTSL
MEFDREYDAQL
LQMEFDREYDAQL
KLFKKIFPSL
KQFEGLADKL
RQFPNKDAL
ALFEKKGAL
RQRRINRQLEAL
SQRLPEGENL
GQKLPQKGDVEML
RQKEIPRVVEQL
KLPQKGDVEML
RLKDLERDSL
VQYRVGDGVYL
VLDRMHSLLIKNL
RMHSLLIKNL
YQRTKNFDKL
LQKKGYPEVAL
KAYAKVNGSYEAL
SIFRKFDLDKSGSM
SQRFRNWNTTL
RQLEREKALL
AQARRTVQQL
AQYSRLGDKWARNK
AQYSRLGDKWAR
AQYSRLGDKWA
MQSGNLWRALGL
GQRDLYAGL
LAQRKYGVVL
AQRKYGVVL
RLKHLSPTDPVL
RLKHLSPTD
KQLTVKEALL
AQWEDVVQKAL
ALRPPLPPLSSL
ALRPPLPPL
RQSLKLLGELL
AQRPRNAQL
RMLDPSIKGTF
AQFEEMKAAL
GQRQVFFEL
RQIIQQNPSL
SVYAKNSLPEL
RQRLQDTVGL
GQKSKADYEL
RLFEKRPAQFL
SQRFRSISTL
SQKSSASGLNL
SQLVHAPPVQL
SQQRKRQTL
RLKEAGNINTSL
RSVVKHIGDLL
RLKAALHDQL
RLRLLPPELL
SQSKRLGSL
ILLATDVASRGL
ALAKKPHIVI
AQYDRRRGMDI
AQYDRRRGMD
REQLKLKLEQI
KIFSKHVAHVL
REYVKANDAYL
REYVKAND
AQQQARVEQL
QQQARVEQL
SQDQKKTQEQL
HQKQMERALL
KQRIDEFESM
LQKMPEGTFL
GQRPLWAQSL
GQYTHKIYHL
SILPKRGALL
IFRQVDVLI
EQFRKLFIGGL
RLQGKLGYFL
IQKEIEELL
LQRPASTTVL
GQILRVSTAL
RQKFTEPGAGL
RLFPKGFSVEL
AQRILRVNL
AQQEAQRAQFL
AQQEAQRAQF
ALRENTYPFL
SQSPRVGFL
AQSLKEHLI
KQLEKIGQQI
AMYPHVTQADL
ALREAERFVI
KLLRKQESTVMVL
ATPGLVSPAL
AQRQRALAI
IQKIREDLPNL
VQHPLRGLFL
YQRTRISLL
VAAKKRKKDML
TVFSHAQTVVL
LMFQREFAL
ALRPTDVVL
AQKVIDTVPL
GQQDVSKVLL
AQMDVKLRSLI
AQMDVKLRSL
AQLKHQIILLL
AQFQVRRPEL
AQFPDAYGKEL
FPDAYGKEL
KLYDNLLEQNL
KMDDKALLVEVQL
RLWDRNMDIAM
RQAAFKLYASL
KQKANLIVL
AQKPDRLRDEEL
AQVEKHKEKL
RQRHLDQAAAAL
RQIEFIIKQL
AQKAALVLL
AQRRKEAADML
QIKRLEEPSL
RLLMHHIRD
RQIKRLEEPSL
IQKNVEQSSNL
KLRNEYGPVL
KLKKPPWVHM
IQQIKEGTL
AQLETAVRGLSYL
GQRSWTPWLL
KLFEKYDLIL
KLFEKYDLI
RLLDKNGQVLL
KLFEKYDL
RLLDKNGQVL
SLFTKELEHAL
AQLQRKFPHL
SLLSHVEQL
RQFERFRRPELL
RQFERFRRPEL
ERFRRPEL
RQRLIEVQDEL
KQYEKSENDL
KQYEKSENDLKAL
IQRTLMELL
REIQRTLMELL
RIVEKYGYTHL
ALIKLLPGQRDL
RLKNFLEANL
RLQEVIETLL
QQQLHQEQEQL
FQYDHEAFL
REVAKEFDQL
TQAVRTGNL
SQRELDTVTL
RELDTVTL
ILMEKEEEGML
KIIEKSGYQAL
RQMHLARFL
SQFLKLTSI
KEAEPDLLAVL
KQFYKASQL
RYHQHLQEQL
RQAQSKEKTL
AMLEREAERL
RVKEPVKELL
LQIEREKLRL
ELIKKEMITML
TQYLKEIAKL
RQDHAKPNLL
RQYQEEEVL
ALRGLLGAL
AQYLPREQYL
RLEEKVGQL
RQRNPRYEKL
RQLPAHKFYFL
TLRDPAPASL
KLRGALSWPSL
PVLPRLDPE
AVFRKELVSKL
AQFAKQTGQWI
AQFAKQTGQWIGM
RQRYGVEALL
KQIIKGRDVI
VQIQKGLLAL
AQLDPLFERVTTL
LQQGKDEAAVL
QLRSTPFRYLL
RQVPRLGVML
LQKQPQPSSL
SQHLFLDLPKL
RQRAGTVTGL
RIYDKFVTQL
RIYDKFVT
RQMSKDYQQVL
IQHAVFKELVKL
GQFTLRDMY
RQFQQGAAGNM
KQEDSLFEEML
AQMVKKMGGIKGL
VQRPVTELTL
SVMDKQYEVL
GQYTKALDILM
GQYTKALDIL
VVFPKKHLI
YLLGKDFVSL
QQEAKYLLPPL
LQKGIHPTII
ILRDALSDLAL
IQKSILRDAL
FQKALEKGIEI
IQDGKGDVTI
KQIKKTGCNVL
KLLQKGIHPTI
KALEKGIEIL
TAFAKQFDIQL
KQKQKAQDEL
FMVEKGPTL
AQLEKAGVEHQL
RMHDEKVDL
SQRPTLKEVL
REKQSKFIL
QLYQRSGDMGL
RVFWKGVLEEL
RVFWKGVLEELL
YMIAHITDL
KILRKVETI
WKGVLEEL
KQKERELRLL
QQQEKKQFDLL
AQQQEKKQFDLL
AQQQEKKQFDL
GQFPTGSSSTNPFL
QQQEKKQFDL
QQQEKKQFD
KELQKVKEEII
ALRPLDKLPGL
GQALPDMEIHL
SLRKQPYNNL
RLRHPNIVEL
FLRPPPLPSL
WQYIKTHKL
KLFDDDETGKISF
SIYPHGSTDKL
RQRAILYKRL
MQFSKQTIAAI
LQKPPYQDGL
LLRQTDPMIML
MQYLKENSL
LLRQTDPMIM
RIFYHPETTQL
RQRNLPRETL
ALYKKFMEDGL
SQKDFKVVL
SQKDFKVVLL
AEKEKVDLVL
RLKEKKLVKEII
KQMLKKEWL
ILKSTSDTPQL
RMKELEENL
AMREAARILL
AQRNNEDVSVIPPL
KQKDKQNISQL
VQKENEFYMQL
RQLSILFRKL
QQIIRETFHL
PQYLKIFKEQL
KIALKEITRQL
FPQYLKIFKEQL
VQYKHLIEL
VQYKHLIELL
QVQYKHLIELL
RFLEKREPKL
ALKKPYGIL
KQKPRKEHL
KEKAKETAL
SQLSKLQDVSL
QQFLKLGGL
QQFLKLGGLQVL
KQREREEREEREAL
AQKLPNLVEL
VQVHKTRPLL
RQFLRGLDFL
KQKIHPTSVI
RQKVWSEVNQAVL
RQRETEAAL
RLKSFTLVVL
IIARKINQL
RQYKLLIKAL
SEFPKKKQNVHL
REFVRQYYTLL
VQEEKSEPVL
VRQYYTLL
AQKRKAGQL
TQFLPRIVTL
TQFLPRIVT
TLKKPPGAQL
FLPRIVTL
KQRQRAEIYAL
RQRAEIYAL
KQKSAQQEL
RQMTVASGNQL
KQFMRRQQVL
QLQRKLHLL
HQFDYGEFVNL
SQLLKDPQVL
AVFPHLTVVLL
SMNIKAHIHML
REYEKRVSAI
RQFVRHESEVASSL
KLKQSLPPGL
IEEIKDFLL
EIKDFLLTA
VITDKEKAEKL
SLVEKYIEEQL
QQVAKYVTL
MLFVRGDGVVL
STKRNIPML
AQVIVLRAL
RQHFPATPLL
KLWERNIKSHL
KLWERNIKSHLG
AMKRIVGMI
ALRGLVGPVL
SQISVRDSQRAL
VQKEIYGSTL
VPFEKKDFVGL
ALNIKQNKAML
SQVKKGKAITL
RIVQKGTQYSL
MLRAPPWVRL
RMLPHAPGVQM
RQRLIGPKGSTL
TLFPKYREAYL
RLIGPKGSTL
RQKDYETATL
IQKSPLSETL
AQRSNSELEL
KQLRKGANEATKTL
RLYQGINQL
KQKALELEEF
RQQFRHVQSNL
QQFRHVQSNL
LQFDKELRSLI
KQISVADLPGL
AQRFLEEKL
RILSKYTLL
RQKSLQRYSL
AVIAHDFLAL
KLRETTPLTI
RLQEPKKDLI
SSYKHWRFELL
KQWEEQREL
KQIKNSSLLSF
VQAEHSESGQL
SQYQQSMDSKL
KQQRKERLYPL
RLNKHEENL
RVVRKSIARVL
KQQRKERLYP
FMYFGPKAL
KLFSPAHKKL
MQWSKVTDKVDLL
MQWSKVTDKVDL
QQKLAGVTAL
KLKDAEKPVL
RMRAKTSDFL
GQLAKQMIGYNL
RLNAKEIVL
KQIEGLVKDL
KQIEGLVKDLL
RFYEKAEESQL
FQKPVEVGSLL
KIWKKNTPFL
KIWKKNTPF
QQRDVIDEPIL
DVIDEPIL
AQVSKAEAL
RIFSHPNVLPVL
KQLRKFVGNL
IMLLKDQVL
QVAKKEDLI
RQLGHPLWSL
QIFGRKSYPML
RQIEGLKLL
RVLAKQLVHL
SSFLKGVML
RQQGKEVGETL
RQQGKEVGETLL
KQAAKQHLTPKL
RMLLKRMVVL
SQWRKLRDREIQL
AVILKLSKVNL
MQRTLTELL
RQAIAERIKPVL
AIAERIKPVL
KLIEKLDIKL
ALRVTDGAL
IAERIKPVL
RQELKQRARYL
RLQSKYDPQKEAEL
VQKTLAQAML
TVQQKLEQL
KSKQPWRDTL
LQWMRNFIRL
RMISKQFHHQL
RQVPFHLHINL
AVVIKKLNEIL
QLAEKLGSL
KMFAKGTEI
YIYAKDRTDRI
RLPQGIVREL
KQFEERLRTL
KQLEDKMVQKL
AQVRRFLLDL
VQFGKDAYVYL
RLKEIKEELL
SQLGKIEELL
RQAQSMIQQL
SQLGKIEEL
KLRDSMELL
RLWEKLTLL
RLWEKLTL
QQIQKVVMAL
QQRAILPCI
QQIELDLKATQAL
RILVKKEEL
REKVKDVPAL
KLILKEELRTLL
KQKPQITEEQL
QQIQKVILAL
QQRAIIPCI
AQQIQKVIL
KMHARDFTVSAL
RQYRQTVRAL
VAFAYKNVKFVL
RQILEKAIQL
QILEKAIQL
QQRSRMLATL
AQASFREGLQL
RQAQASFREGLQL
ASFREGLQL
SQKLVEEAKL
TQKARFEVVL
FQLKKDQVVLL
FQLKKDQVVL
KLADVQIEQL
HQQDVLLTQL
RLFGKKQMRIL
RVNMKDLPSL
RLIFPGEKVLL
RLAIKLMTSL
AIFSKKNFESL
NAIFSKKNFESL
AIFSKKNFE
AIFSKKNFES
FSKKNFESL
SKKNFESL
RMRPPLQSL
AVLDHTIPYL
WSKKNELFSNL
RIRAALNSVRL
KQQEKQKPTP
RLAKKGIDYNFPSL
AIFNKSTGKVVL
SLYRKLLTL
KLHQDEKKKL
KQRKTAAELL
QIQEKSIQAVL
RAARLVEIAAKNL
KQKEDVDIV
VQRLPFLPSSNL
AQIIKEVLL
RQKDVKIVTV
QQRQSPTQVI
KQQVKDVQKL
KMDRKDKLFVI
AEFLKVFIPSL
FLKVFIPSL
LKVFIPSL
LQSQKFQIGDYL
AQAIKGMHI
ISQKKLKKQKL
GQKLVAAYVL
TEFSKKTGDYPSL
TEFSKKTGD
RQKTDVFAP
KQKQNRPIPQWIRM
SSHKTFRIKR
RHWRRTKLGL
KQNRPIPQWI
SVMSRVGTAQL
KQLDKKREWEMM
SVSKKDFISVL
KEKEKLKQERL
KQLDKKREWEM
LQKLKEKIALL
AVFHKQMDSL
AQMAAKLERL
REKDKHIEEV
RQRYSAPPTL
EILKKIIPTL
GEILKKIIPTL
RQYSTRLAVL
QQAERLFENQL
SLRSLSNINSEML
KQFQARVISVML
IQYLRDYLHL
HQRKRIHQL
SAYRKALDDMI
SVAEHFLEQQM
SAYRKALDD
STIRLLTSL
SQKFLQGLVYL
MAWRPIQAL
AWRPIQAL
LQLEKNLTMI
KQIEAKIEEL
RAQTKQQLL
IVANKQDLRNSL
AQKSGYFLCL
AQKSGYFL
KVLNNMEIGTSL
SLMPKMHLL
KQALKDFEKL
RQKLADRSEASL
RILKKGKAKQAL
KLADRSEASL
LEARQAMQEQL
RAVDFAERHGYI
GQFVYCGKKAQL
GQRKGAGSVF
RLRGTKTVQEKEN
AQILLKALTNL
QILLKALTNL
NLATLERY
KQPTIFQNKKRVL
FQNKKRVLL
TIFQNKKRVLL
RILSGVVTKM
AQAKSKQAIL
IQVNKPAVL
KQQQKHRLENL
SLFNRMDFEDL
RIRAIENIDTL
QQIRKLIKDGL
QQIRKLIKD
LQKRLASSVL
RLQKRLASSVL
QQIRKLIKDGLII
LQAKKEEII
RLQAKKEEII
AQQEARTEFL
KQRPKGPPSL
AQTQPPWYQL
GLAWIVGRVL
RQMQSTRDGRML
RQVLKDLVKVI
SLWGKLASEIL
REKRTTVVAQL
RQFVKDSIRL
FVKDSIRL
RQRSDPGHYGFSL
RQRSDPGHYGF
KQKERERIRL
AQHHKSFDPVL
RSKKNEIMV
YQNNKDFIDSL
RTFGKQQWQQL
SQLPRIFTSI
SQLPRIFT
ALRYPMAVGL
RYPMAVGL
ALRYPMAVG
RLRAPDLEYL
KQLAKKIEPEL
QLAKKIEPEL
RLRAPPNPTL
VQFPSRKSVML
LQYRGRVRVQL
KMKEKVERIL
FQVKRQVLL
KMKEKVERI
ISIAKAGILTTL
KIRGNINICL
TQRPADVIF
SLHLPPNCVL
TQFPGREQHVRL
RLASGKPVQL
IQEKKENLL
YLRIPDEII
KLKEIFDKIHSL
KLREAEQQRL
GQARLRGLYAL
RLLYKDLTTTL
ISMEKGDMITL
KQIQRRNPEL
KQIQRRNPELL
RQHEDFVWL
KQIEERNERL
QQKQQYTNQL
RQRQLEQSL
RQMHSLKGEASL
IERRKTGKEML
QMHSLKGEASL
KLLEKKKTEL
AQKARKEIADYL
SILKKVLEAL
ALKKPALPAL
SQFLKAAEI
RQIAKAYARI
IQFKKHEEEGI
SQASRTPLTTL
AQAWFNTHREL
KQQHKLRDEDL
KLKVPFGNKL
KEIAKMAEML
GLFAHHSLWQL
ALLEHKELL
AHHSLWQL
ALFAVPKNYKL
AQMDYYGTRL
SQAAKVAEL
KLLGPDAAINL
KQSVTIKTML
KMKETAENYL
RQATKDAGQI
ALPRLNPPVL
AIKKFAEAF
HIYAKVSGGPSL
RQIHKFEEL
QLREKYGDKML
AQLSTIRSF
KQDYKEGEMTL
KQKEVEQLI
GGKRPFGVSL
AQYQREYSEF
RFRIPWKHGL
RLRPPIMTMM
VQIKTIWSTML
RLKDSWVERL
SQLNEKVAQL
QLNEKVAQL
RLRPPIMT
IQKRRESGEKI
AQAPARDGGAQL
AQHQQVRQI
RQIRKKMMEIM
GQKVVVVDDLL
VLFDKATYDKL
YQHAIEESVVL
KQVQIDGLVVL
RLIEGAHPGSL
RQRLTEPQHGL
RLVSHFPEEAL
AALYKEVRDLL
KQRLKDKPLL
SQQPKEDEAL
GQKPSSGATQL
GQFQKIVGGLIEL
KQREAQQQQL
MMKAGIIEEML
GQKDVCVVL
AQRQSLSRAQTL
RQYLKPDAVL
AQYIRSELV
LQKGQHPAQL
RLARKPDSVVI
RQKGIFYLTL
SLLQKSKLGFL
KQKDLLEQMM
RLAVKAAAL
AQVSRAWNVL
VINKKLPKELL
GQKIRFGEAL
FVFQHEEIAQL
AQKLLQDVKDTL
AQHKGHATAL
VQIKMTGRAL
GVVRKSREWVL
AQFIRLLERL
FTYPKGAGEML
SVYDKKLLIGTL
RQMYRTEIRM
RQIFNGTFVKL
AQALLGAAKML
SALRKMGVNL
ALRKMGVNL
RIRDTPEDIVL
KQRENYLGNSL
RQAAKTEIEKL
AMYVHAYTL
KQVEKANEAM
RVLKKNPLKNL
SLLKKEFEL
GQMQKPFEDASFAL
SQHQVHAVQQL
SLFPHHGTFEVI
QILLKGAERL
RQHQSAAKDL
AQLLRKIQLL
ALKLNIGDL
AQLLRKIQL
QLLRKIQLL
AQYESKKAKKPAL
HMFTKEELEEVI
KEAIKSSLIIL
SIYGKQFEDEL
RQFPGSHRVKRL
RQKNQAVNFL
KLIEVDDERKLR
KLIEVDDERKL
KLQRKLPVESI
AQLKKSADTL
KLKDEEVAQL
RFQQKQIENVL
QQKQIENVL
MSFRKVNIVIL
KQLYRSRMNTL
KQMEQISQFL
KQYDADLEQIL
KQFAKFVVDL
KLREVVETPLL
KLREVVETPL
GQRFLVGNQL
KQVDVFRQNL
PQKIIYLNQL
RMKEKADIQL
RLRDFEVKDLL
IQAQKYIEL
IVKQAGLERM
LLHIKQVDPQL
ALYRHLGTLL
RLKESVAPVL
RSRTPYHVNL
LQKRFILNL
SRTPYHVNL
RQLKKLDEDSL
RQLKKLDED
RMFEKHDQDRDGAL
RMFEKHDQDRD
SIITKCSIPVL
YQATRIFASNL
KQRHNITLL
VQKINEMYTSL
DSQMDDVEVI
VQKDPQENILL
AQNPDQGPKL
SLAERFGVL
VQWPRGALSL
KQKLVPIMTI
KQKLVPIMTIL
RQLPADFGRLVNL
GQLEVFREKSL
ALKQIPPLNL
QQQQKIIAL
RLYQPTVPL
IQHDPLTTDL
RLAELSDYRRL
SQLSFRRSPTKSSL
AQRVPAFETL
ILRIPPNVLL
QQFEETVRTL
AEYSHFVLGNEL
LQKGYGLGSGISL
AQKLFGMTI
QQAVKSPPLL
QLRLPGQQL
GQKVLVNVL
HQKGLQDFDTL
KLLQKKWTTFL
QQRLLESVVVL
HVYIHHFDSIL
RLFDIHKQVL
GMPAFKPGEKVL
RQIQNQLEEML
RQRVRMADNEVM
FQIYRPRWGAL
FQIYRPRWG
KQKVAYGDL
AQKNHIPVL
AIFAKRTGMIIL
LSKPAFASL
ALMAKIGAFL
RQKAVSLFL
AQSLPPAWQL
TQFTGRYHYL
SLMGVEVRQML
GQILAQERALL
VQFMKLGML
GQILAQERAL
VILPKTGIVLL
VILPKTGIVL
IAPMLLQQL
PSNWTLEEAASVP
HEDSQNRKKLSELL
KIKEKYIDQEEL
SQFIGYPITL
EDSQNRKKLSELL
SQFIGYPIT
DSQNRKKLSELL
SQNRKKLSELL
GQLEFRALL
SQNRKKLSEL
FIGYPITL
VQIENIYKSL
KLRPLYDIPYM
KQFQKVITEYL
RLLQRDVQIIL
VQRGIVKMVL
LQRDVQIIL
HQKPVNAII
RQIPSTEKKIVL
QQRDTMQDNLL
RQSQKLQLI
RMFDKNLQDLV
AGKRPSEPTL
KQMEKIQPAL
SQKIQQLTTL
GQVKVFRAL
AQWRRSEGL
AQLLKGSPELQL
AQLLKGSPEL
FIFQKVGKL
RLLEKEGLTL
ALITKVGLAL
IMHDYPPLL
RQYLAINQI
YQMNAGWKYL
VVHHKIEML
SIVVHHKIEML
EVFSKYYTPVL
QQKQVSLEAWL
RQQIRRAEHL
AQFAQLAQL
ALQQKQVSL
QLLRKQQTIIL
QQIRRAEHL
IQWKRRQQL
MLKPPLPLRSLL
MLKPPLPLRSL
REHRKQPKQML
RLYETFVVQL
AQLNHRSLDF
KLAEKKEFL
RQKEIWHLL
AQFAARAIISEL
AQFAARAII
SQLYHNQSQGLL
AQFAARAIIS
FAARAIISEL
RVQLKDMGEDL
AARAIISEL
LEKKKRVQL
AQFGKDLIETL
GQQDITNKLSL
HQISKDYGVYL
KQKARAEERL
HQFEKIEQF
KLKEFMPPGL
SLREIGNLL
KVQPKGRGML
RLYRLLKPAL
GLFRRGEAHL
AQRLPGITL
KLNYKPPPQKSL
VMVDSKPVNL
VQIRRVEERL
SLADAMSQKHL
RQVEPTVTIFL
KLKPVHGLIFL
AVFKKALPAL
SQRTTAPEEEL
AQRKRKIEHDG
AQRKRKIEHDGSL
IQHDLIFSL
ADPALNQEVAL
INRKLNLKIDI
RMDDKSGGLL
GEFEKKYIPTL
RQMQVKLNLP
IVHQKFLGAVL
TQYERIKERL
GQIQDVFKRL
SLKSALIDTLI
SLKSALIDT
AQFEHTILI
ILRTIVQQL
RQYMNRRGGF
RLFNFATKRI
PNSVRKIILSNV
QQRLFTDVLL
RQQRLFTDVLL
RQKPSNTEDFI
SQKDSEQVTI
IQTQKSAEL
GQSKKQILL
LQVDKGATGISL
YQFRRHPRAVL
RLKAPTVGL
QQHQKQHTRETL
HQKQHTRETLL
HQKQHTRETL
KQHTRETLL
AIFSKNSKYIL
QQLYKLIISQL
YKLIISQL
AVFNHTEDYVLL
AVFNHTEDYVL
QQRPVLPSL
AQFKQLLISAL
TQQEVPVIIL
AQLRKKKESL
RLKVALEPQL
GLFLKGIGLTL
RQSSLLFKIL
RQKELWNLL
RQAPKIAQI
SQKEIKKAYYQL
ILFTHKEDL
FQIWKPLGQVI
KQQKKKASL
RIKKKEYVEL
KVKDAYLVHL
AQAPVRTVEQL
ILIATDVASRGL
GLKQPTPVQL
KQKERFAAL
MMLRKFNFPTV
MMKQKERFAAL
MKQKERFAAL
AQKPEYDVVL
RQLQQDPLSQL
RLFSKGFLVAL
AQILTAFPAL
KVKEAERDISL
RQFAHFLMEKL
SQRGPDALL
VQKVVVHPLVLL
NQKRVVGVLL
GQWKKGFVL
KSYRRKDGVFL
MRYVASYLL
ALKQLLEVVL
ALRGAFGTL
RLHIKFKESL
SLRSHPGTSL
HSFPHPLPSL
AQIAEIIRSF
KQIIISEIINSL
AQKEAVIKHSL
GQYSHLVLL
QLYKSADHPTL
VIRAKQIWEIL
KLLEKLYKVNL
EKLYKVNL
GSKPVIYPVL
KQLERHQELL
ALRSPRPPVL
EQWERALEAGL
MQFLKEETL
KLMDLRNEYL
SQYEVFRSSRL
RQKEVITKTF
KQFLMKVLI
RQHRHLVTLL
RQHRHLVTL
RQHRHLVTLLL
RQHIPDTYL
RQVVRDMKDQM
RIRESVSEELL
SQKELYRDVML
LQLDRLKTQL
AQFLGHVETL
RQQRNEPTQIL
SIFKKHMEYL
RQYMNRKGGF
LQKTPPPVLI
LQKTPPPVL
ALKQSSILNQLL
LQKQRLKEIL
LEKKKYEEAL
GQRYHEKQISL
RQFSTPFQL
AVQTKLIML
GQRERRESL
AQKLYEHEINL
KLYEHEINL
SLFKKETNIQL
VQKNSEKYLSEL
AQYKKPPITV
SLYKDLKPVL
RLLSRKQFQL
KMQERMSTQL
RQKKLEMEKL
IQIETGAKVFL
AQKRRFTEEL
LQMAHSAEAKL
KLKSPQAVL
KFKQVEKAIL
SQVDVDAFRQL
KMKIPPSEMF
ALRDNVLPEL
AQKIYGADNIEL
RQVEARVSTL
AGKPPPGLHL
EQFRREGFL
VQKPADLARHL
RLHQHGKLTLL
RLHQHGKLTL
HQHGKLTLL
KQQQRKEKL
EMIKKEEERL
RQRSLLEKELL
RQQEIEREREL
RQWKKISAI
RQWKKISAII
TLLQKLDFPTM
RLFSHPREPTL
RLRERELSVQL
GQHTNVDML
KQKDNGVAL
AQVAKESVL
RQVELIRNSREL
ALFLHRAFHL
AQRSVNPGEI
MLMRKGQESL
RQVSKLLPVI
VHIMKEGL
RQRQQQGGMI
KQKFQSMDVSL
ALFSKPASL
ALFSKPASLSL
KQKFQSMD
KQKFQSMDVS
KQKFQSMDV
RSKFLDALVTL
KQAGVAIGRL
AQRLRVLEEL
AQRLRVLEELL
RLRVLEELL
VQHVKNLLFDEL
TQLRHVLTQMI
KQQNEKTIAQL
QQNEKTIAQL
RQVTRKLFGHL
LQRETEHSVSL
RQRLLPPLL
AQKKVERQAEL
RQAELKRKF
GVFAKFRDIAQL
RMVETLSNLL
GLYKKQSQI
KQIQPFQVL
VLLEHGLERL
KQLPKRTFQDVL
RLRMVETLSNL
MAFEKTLTPII
FQAGIISKQL
IQYQKRFIEL
SQFQKTYSL
LQKTKQLEEL
SQLHRRKVISL
QLYSKRFGVFL
SLPEKIGQL
IQKADIFMF
KQRLKAAITI
IQKADIFM
TQNPYNAVIHL
ALLEKVPAELI
KVFDLRGTFQPL
SQLSHQDLQL
RVRKLPSTTL
LQKLTEILNL
ILQKKTYVTL
VQWQKTYESL
KQFDKVREDMEL
SVFRKGDSAYL
KQIQSDRQNLL
KQIQSDRQNL
AALRKIIPTL
RLWSKYSADQI
KLMGKKGTFL
KVKQHTKEEL
ITYAKGFGML
RIFGKKQMRIL
SIFNKDLLATL
SIFNKDLLA
SQRRKLAAVL
AQATIDRNL
YLYEKANTPEL
KQKPRFHAFL
AQLSREADL
RLKETLAQL
VQRLPSIALL
TQWKKVLIVL
SQYQQMLHTNL
QQMLHTNLVYL
LHTNLVYL
RQHNYTEAFESL
RQIYTLGRYL
AQRTQLFDTL
RQVTKEEGL
RQVTKEEGLAL
LQRSKETQEEL
IQKQTMLESL
RVKLQDGVHVI
AQKIQTRKDLL
KERQKQYD
KERQKQYDCL
SQPGFRKHLGL
AQELKNAEIAL
KMKIQTSFYEL
IQRSPVTLL
LEIARSLDSFML
QLGQQLVSQLL
AQREHLSAAF
AQRVADEMDVML
RQLDRIIAKL
ILRSNLGSVVL
KQKVYNPRI
RLKSSEGMSL
LQKKIEENERL
RQVDTGNTGRVL
AQKQQVQEL
VQLERVGLL
AQIARLEQTWVTL
ALLHKTIQL
RQRHTEGAIL
FIYAKGNFPMI
RLREINSMI
QQHFDKSKAL
DGSLIQKMQIPTL
SLIQKMQIPTL
GSLIQKMQIPTL
IQKMQIPTLL
IQYSGSLLNSL
RQKAAVLNKL
KLYEKKLLKL
GEQRKDVYVQL
EQLQRQGLLSL
AMRTVDILASL
RLFSHLHEL
RTILKAPDIVL
ILKAPDIVL
AQRSPLLPAVL
KQVPSFRKLL
RSPLLPAVL
KLKKSNVVSL
KMKAMEEEVL
KMKAMEEEVLI
QLRAFIPEML
KQRVSWTQAL
AQFSKSIEVI
RQDTKEAQL
AQYWPTKDDREML
YWPTKDDREML
QQKTKAVVML
AMAEPNAKFI
RLRSMPASFL
YQISPNETRVL
KLWRKLLKGI
QQQQKTSAL
FQIQAERIL
AQKRSSDGRLL
KQADWARNI
AQYFKDRHKL
GIPLKEKPVL
VQVDREDIVEL
KLKEIAQLL
SQRKKEQDKL
RQQPREAAVLL
KELQKEFPAL
AQFQKNSKL
RQQPREAAVL
RLRERLEYVL
VQKDQHSFEL
RVQGKEKHQTL
ILRDTLQTDTL
ILWEHLEIL
IQQKNMAML
RQLSKLLLHRQL
LQREIYNDL
RIIYKNSTSVI
QLSKLLLHRQL
GLFSHAEIKAII
AQQMKNLEVFM
GSIQYKKKEEML
SIQYKKKEEML
IQYKKKEEML
REKKKVERL
SLKKNVGQF
EKGSIQYKKKEEML
KLKKPPTDEEL
SQFRKINTL
RQSLEIISQYL
RQSLEIISQ
LEIISQYL
AQFPSSGRFWKL
FPSSGRFWKL
QQVERHREHL
RLQEIFTEKVL
ALLSHWDPTL
AEYLRDMEANL
SQKSALGSAL
RQIAIKAIGQTEL
RLREPLVLTI
GQYKKAIASL
RQFWGSRSEL
RQNAKLRVDQL
AQKFISDIANDAL
AQKFIDRGKDFNL
HQKTFIGKIPIML
KFIDRGKDFNL
LLLKKRHIDQL
KLLLKKRHIDQL
AQKFIDRGKD
IAHGAAQFL
FIDRGKDFNL
GLWVKLTKEQL
TLFEKNAAPIL
VQRITDATL
AQVKKATVFL
RQRQRIKELEEM
RQRIKELEEM
GQLVKTDSIPVL
SQRMRVPEKL
VKTDSIPVL
LLKPPLEQL
RQHEKKSIYNL
RALQKRTQTLL
SQRFIPELI
LQKRTQTLL
AQKPPPGAL
LIYEKLEKL
GQVTRADILQTGL
IQIDGAGKTL
[truncated: 4,615 more rows]
